# Supplementary material for: COVID-19 Related Myocarditis in Adults: A Systematic Review of Case Reports
Source: J Clin Med. 2022 Sep 21;11(19):5519. doi: 10.3390/jcm11195519 (PMC9573317; doi:10.3390/jcm11195519)
Supplement: Supplementary file 1 [file jcm-11-05519-s001.zip › jcm-1908176-supplementary.pdf]

| LP | Title                                                                                                                              | Author (one surname et al.) | Number of reported cases |
|----|------------------------------------------------------------------------------------------------------------------------------------|-----------------------------|--------------------------|
| 1. | Myocarditis in a patient with COVID-19: a cause of raised troponin and ECG changes.                                                | Doyen et al.                | 1                        |
| 2. | Diffuse myocardial inflammation in COVID-19 associated myocarditis detected by multiparametric cardiac magnetic resonance imaging. | Luetkens et al.             | 1                        |
| 3. | COVID- 19-related myocarditis in a 21-year-old female patient.                                                                     | In-Cheol et al.             | 1                        |
| 4. | Acute myocarditis presenting as a reverse Tako-Tsubo syndrome in a patient with SARS-CoV-2 respiratory infection.                  | Sala et al.                 | 1                        |
| 5. | Endomyocardial biopsy findings in Kawasaki-like disease associated with SARS-CoV-2.                                                | Bonet et al.                | 1                        |

|     |                                                                                                                                                                                   |                 |   |
|-----|-----------------------------------------------------------------------------------------------------------------------------------------------------------------------------------|-----------------|---|
| 6.  | Coronavirus disease (COVID-19) associated delayed-onset fulminant myocarditis in patient with a history of severe acute respiratory syndrome coronavirus 2 (SARS-CoV-2) infection | Ishikura et al. | 1 |
| 7.  | Presence of active myocarditis at the 6 month follow-up appointment for a severe form of COVID-19: a case report                                                                  | Meyer et al.    | 1 |
| 8.  | COVID-19-related myocarditis post-heart transplantation                                                                                                                           | Roest et al.    | 1 |
| 9.  | Cardiac involvement in a patient with coronavirus disease 2019 (COVID-19)                                                                                                         | Inciardi et al. | 1 |
| 10. | Coronavirus fulminant myocarditis saved with glucocorticoid and human immunoglobulin                                                                                              | Hu et al.       | 1 |
| 11. | First case of COVID-19 complicated with fulminant myocarditis: a case report and insights.                                                                                        | Zeng et al.     | 1 |

|     |                                                                                                                       |                     |         |
|-----|-----------------------------------------------------------------------------------------------------------------------|---------------------|---------|
| 12. | Clinical and Histopathologic Features of Myocarditis in Multisystem Inflammatory Syndrome (Adult)-Associated COVID-19 | Aldeghaither et al. | 1 of 3  |
|     | Clinical and Histopathologic Features of Myocarditis in Multisystem Inflammatory Syndrome (Adult)-Associated COVID-19 | Aldeghaither et al. | 2 of 3  |
|     | Clinical and Histopathologic Features of Myocarditis in Multisystem Inflammatory Syndrome (Adult)-Associated COVID-19 | Aldeghaither et al. | 3 of 3  |
| 13  | Clinically suspected myocarditis in COVID-19 patients: Case series and review of the literature                       | Amin et al.         | 1 of 11 |
|     | Clinically suspected myocarditis in COVID-19 patients: Case series and review of the literature                       | Amin et al.         | 4 of 11 |

Clinically suspected myocarditis in  
COVID-19 patients: Case series and  
review of the literature

Amin et al.

6 of 11

Clinically suspected myocarditis in  
COVID-19 patients: Case series and  
review of the literature

Amin et al.

7 of 11

Clinically suspected myocarditis in  
COVID-19 patients: Case series and  
review of the literature

Amin et al.

8 of 11

Clinically suspected myocarditis in  
COVID-19 patients: Case series and  
review of the literature

Amin et al.

9 of 11

Clinically suspected myocarditis in  
COVID-19 patients: Case series and  
review of the literature

Amin et al.

10 of 11

|    |                                                                                                                                                                      |                 |          |
|----|----------------------------------------------------------------------------------------------------------------------------------------------------------------------|-----------------|----------|
|    | Clinically suspected myocarditis in COVID-19 patients: Case series and review of the literature                                                                      | Amin et al.     | 11 of 11 |
| 14 | Case Report: Co-occurrence of Myocarditis and Thrombotic Microangiopathy Limited to the Heart in a COVID-19 Patient                                                  | Menter et al.   | 1        |
| 15 | Case report: high-grade atrioventricular block in suspected COVID-19 myocarditis.                                                                                    | Ashok et al.    | 1        |
| 16 | Management of COVID-19 myopericarditis with reversal of cardiac dysfunction after blunting of cytokine storm: a case report.                                         | Li et al.       | 1        |
| 17 | Microthrombosis as a cause of fulminant myocarditis-like presentation with COVID-19 proven by endomyocardial biopsy <b>COVID confirmed by antigen test (not PCR)</b> | Nakatani et al. | 1        |

|    |                                                                                                                                               |                  |   |
|----|-----------------------------------------------------------------------------------------------------------------------------------------------|------------------|---|
| 18 | Delayed acute myocarditis with COVID-19 infection                                                                                             | Ismayl et al.    | 1 |
| 19 | Fulminant Delta COVID-19 myocarditis: a case report of fatal primary cardiac dysfunction                                                      | Thomson et al.   | 1 |
| 20 | Arrhythmogenic Cardiomyopathy as a Late Complication of COVID-19-Induced Myocarditis                                                          | Campoamor et al. | 1 |
| 21 | Veno-arterial extracorporeal membrane oxygenation for COVID-19-associated acute myocardial injury complicated by refractory cardiogenic shock | Flagiello et al. | 1 |

|    |                                                                                                       |                                    |
|----|-------------------------------------------------------------------------------------------------------|------------------------------------|
| 22 | <p>Cardiogenic Shock due to COVID-19-Related Myocarditis in a 19-Year-Old Autistic Patient</p>        | <p>Pascariello et al.</p> <p>1</p> |
| 23 | <p>Successful heart transplantation for COVID-19-associated post-infectious fulminant myocarditis</p> | <p>Gaudriot et al.</p> <p>1</p>    |

|    |                                                                               |                      |                |
|----|-------------------------------------------------------------------------------|----------------------|----------------|
| 24 | Myocarditis and Pericarditis in Patients with COVID-19                        | Shah et al.          | 3 (2 included) |
| 25 | Myopericarditis and myositis in a patient with COVID-19: a case report        | Shabbir et al.       | 1              |
| 26 | SARS-Cov-2 fulminant myocarditis: an autopsy and histopathological case study | Gauchotte et al.     | 1              |
| 27 | COVID-19 fulminant myocarditis: a case report                                 | Bernal-Torres et al. | 1              |

|    |                                                                                                                        |                      |   |
|----|------------------------------------------------------------------------------------------------------------------------|----------------------|---|
| 28 | Myocarditis Associated With COVID-19                                                                                   | Oleszak et al.       | 1 |
| 29 | Fulminant myocarditis in a patient with coronavirus disease 2019 and rapid myocardial recovery following treatment     | Gay et al.           | 1 |
| 30 | Cardiogenic Shock Caused by SARS-CoV-2 in a Patient with Serial Negative Nucleic Acid Amplification Tests. Case Report | Gomila-Grange et al. | 1 |

|    |                                                                                                                                                                                              |                  |
|----|----------------------------------------------------------------------------------------------------------------------------------------------------------------------------------------------|------------------|
|    |                                                                                                                                                                                              |                  |
| 31 | An Atypical Presentation of Fulminant Myocarditis Secondary to COVID-19 Infection                                                                                                            | Richard et al. 1 |
| 32 | Evidence of SARS-CoV-2 mRNA in endomyocardial biopsies of patients with clinically suspected myocarditis tested negative for COVID-19 in nasopharyngeal swab                                 | Wenzel et al. 2  |
| 33 | Case report: lymphohistiocytic myocarditis with severe cardiogenic shock requiring mechanical cardiocirculatory support in multisystem inflammatory syndrome following SARS-CoV-2 infection. | Bemtgen et al. 1 |

|    |                                                                                                                       |                      |   |
|----|-----------------------------------------------------------------------------------------------------------------------|----------------------|---|
| 34 | Acute myocarditis associated with COVID-19 infection                                                                  | Beşler et al.        | 1 |
| 35 | Focal myocarditis in a young male with SARS-CoV-2 infection.                                                          | Meel et al.          | 1 |
| 36 | Myocarditis revealing COVID-19 infection in a young patient.                                                          | Paul et al.          | 1 |
| 37 | A Recovered Case of COVID-19 Myocarditis and ARDS Treated with Corticosteroids, Tocilizumab, and Experimental AT-001. | Coyle et al.         | 1 |
| 38 | Fulminant myocarditis due to COVID-19.                                                                                | Irabien-Ortiz et al. | 1 |

|    |                                                                                                      |                 |   |
|----|------------------------------------------------------------------------------------------------------|-----------------|---|
|    |                                                                                                      |                 |   |
| 40 | Virus-Negative Necrotizing Coronary Vasculitis with Aneurysm Formation in Human SARS-CoV-2 Infection | Frustaci et al. | 1 |
| 41 | Myocarditis detected after COVID-19 recovery.                                                        | Sardari et al.  | 1 |
| 42 | Terra incognita: clinically suspected myocarditis in a SARS-CoV-2 positive patient.                  | Warchoř et al.  | 1 |
| 43 | Management of a critically ill patient with COVID-19-related fulminant myocarditis: A case report.   | Shahrami et al. | 1 |
| 44 | COVID-19-associated myocarditis presenting as new-onset heart failure and atrial fibrillation.       | Gaine et al.    | 1 |

|    |                                                                                            |                  |   |
|----|--------------------------------------------------------------------------------------------|------------------|---|
| 45 | ST elevation revealing acute myocarditis with SARS cov 2 infection: Case report.           | Taouihar et al.  | 1 |
| 46 | COVID-19 myocarditis and postinfection Bell's palsy.                                       | Dahl et al.      | 1 |
| 47 | Delayed Acute Perimyocarditis and Bilateral Facial Nerve Palsy in a Patient with COVID-19. | Matsumura et al. | 1 |
| 48 | Acute Perimyocarditis in a Case of Multisystem Inflammatory Syndrome in Adults.            | Praet et al.     | 1 |

|    |                                                                                                       |                          |   |
|----|-------------------------------------------------------------------------------------------------------|--------------------------|---|
|    |                                                                                                       |                          |   |
| 49 | Self-limiting COVID-19-associated Kikuchi-Fujimoto disease with heart involvement: case-based review. | Masiak et al.            | 1 |
| 50 | Stemi mimicking post COVID: a case of focal myopericarditis post COVID infection.                     | Atif Masood Noori et al. | 1 |
| 51 | Suspected COVID-19-Induced Myopericarditis.                                                           | Okor I. et al.           | 1 |

|    |                                                                                                                                                  |                 |   |
|----|--------------------------------------------------------------------------------------------------------------------------------------------------|-----------------|---|
| 52 | COVID -19 Complicated By Acute Respiratory Distress Syndrome, Myocarditis, and Pulmonary Embolism. a Case Report.                                | Bulbul et al.   | 1 |
| 53 | Coronavirus disease 2019 (Covid-19) presenting as purulent fulminant myopericarditis and cardiac tamponade: A case report and literature review. | Khatrri et al.  | 1 |
| 54 | Delayed acute myocarditis and COVID-19-related multisystem inflammatory syndrome.                                                                | Nicol et al.    | 1 |
| 55 | Case report of severe PCR-confirmed COVID-19 myocarditis in a European patient manifesting in mid January 2020.                                  | Hudowenz et al. | 1 |
| 56 | Fatal lymphocytic cardiac damage in coronavirus disease 2019 (COVID-19): autopsy reveals a ferroptosis signature.                                | Jacobs et al.   | 1 |
| 57 | Coronavirus (COVID-19) Fulminant Myopericarditis and Acute Respiratory Distress Syndrome (ARDS) in a Middle-Aged Male Patient.                   | Hussain et al.  | 1 |

|    |                                                                       |                 |   |
|----|-----------------------------------------------------------------------|-----------------|---|
| 58 | Atypical Manifestation of COVID-19-Induced Myocarditis.               | Rehman et al.   | 1 |
| 59 | Subacute perimyocarditis in a young patient with COVID-19 infection.  | Monmeneu et al. | 1 |
| 60 | Myocardial localization of coronavirus in COVID-19 cardiogenic shock. | Tavazzi et al.  | 1 |

---

| Demographic data | Country | Origin/race/ethnicity | Age (years) | Sex (m/f) |
|------------------|---------|-----------------------|-------------|-----------|
|                  | Italy   | NR                    |             | 69 m      |
|                  | NR      | NR                    |             | 79 m      |
|                  | NR      | NR                    |             | 21 f      |
|                  |         |                       |             | 43 f      |
|                  | NR      | NR                    |             | 19 m      |

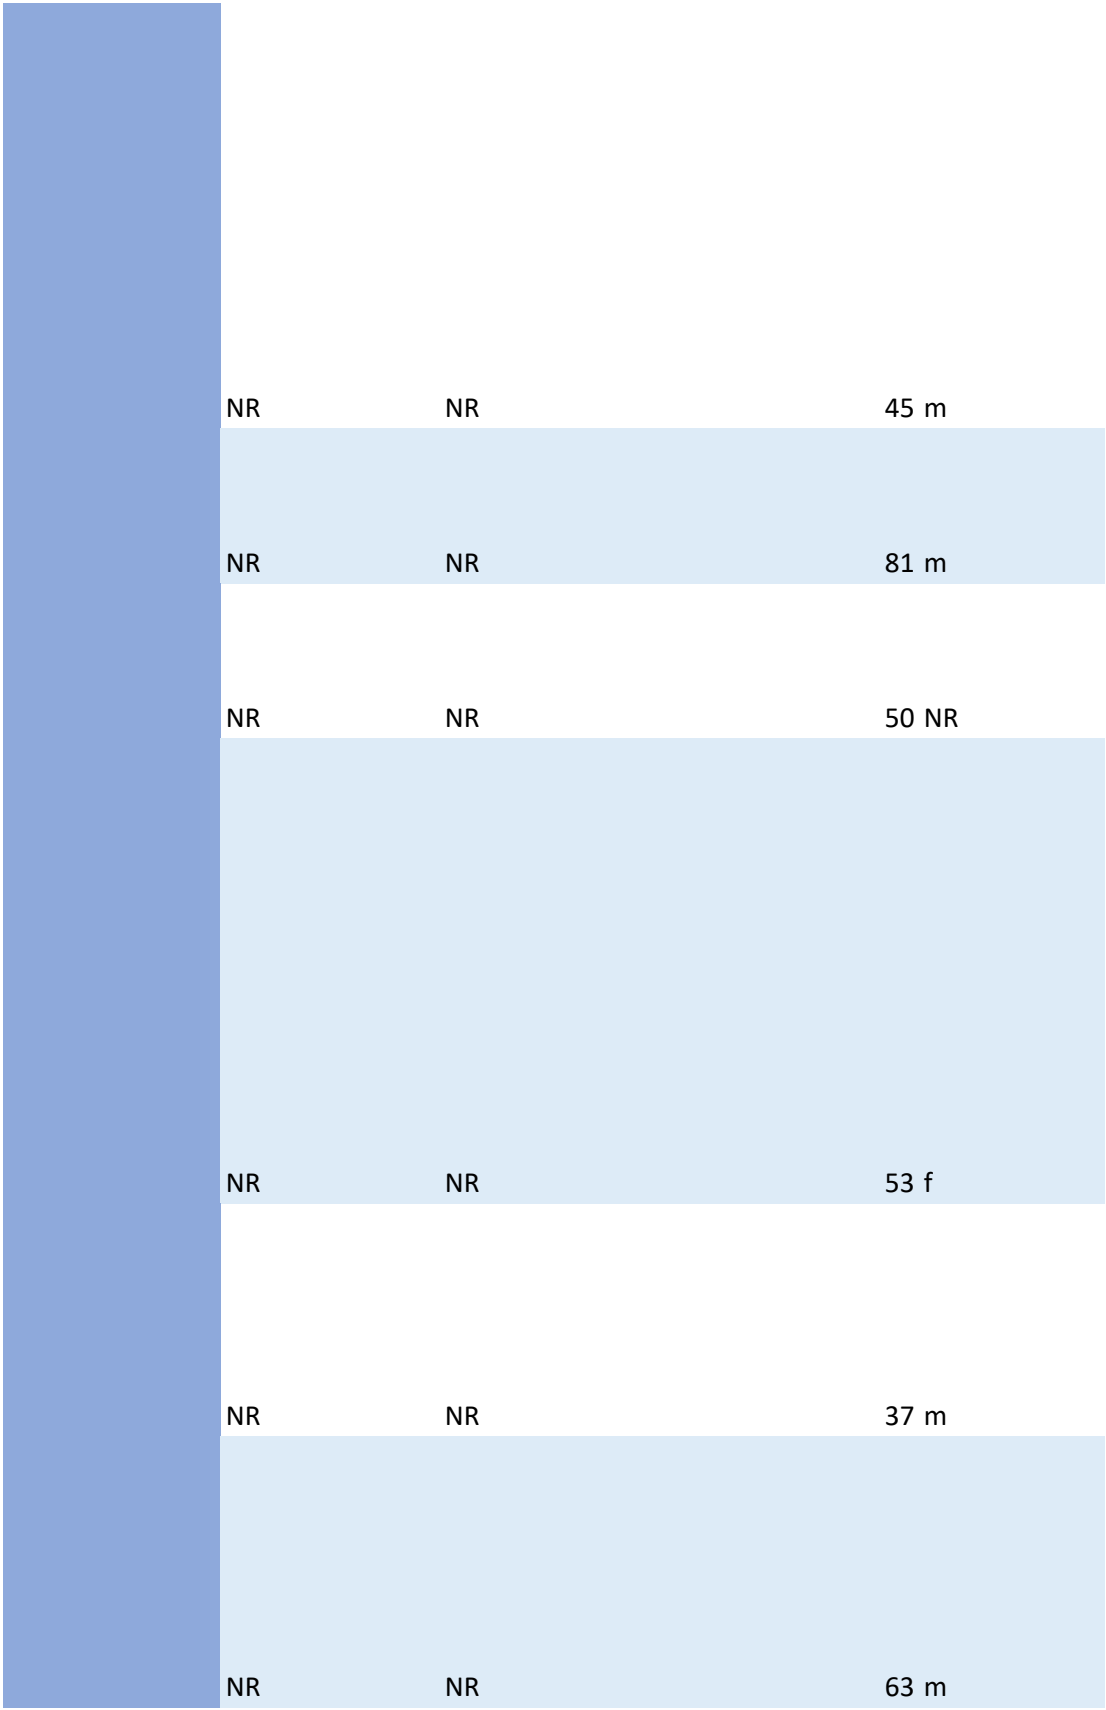

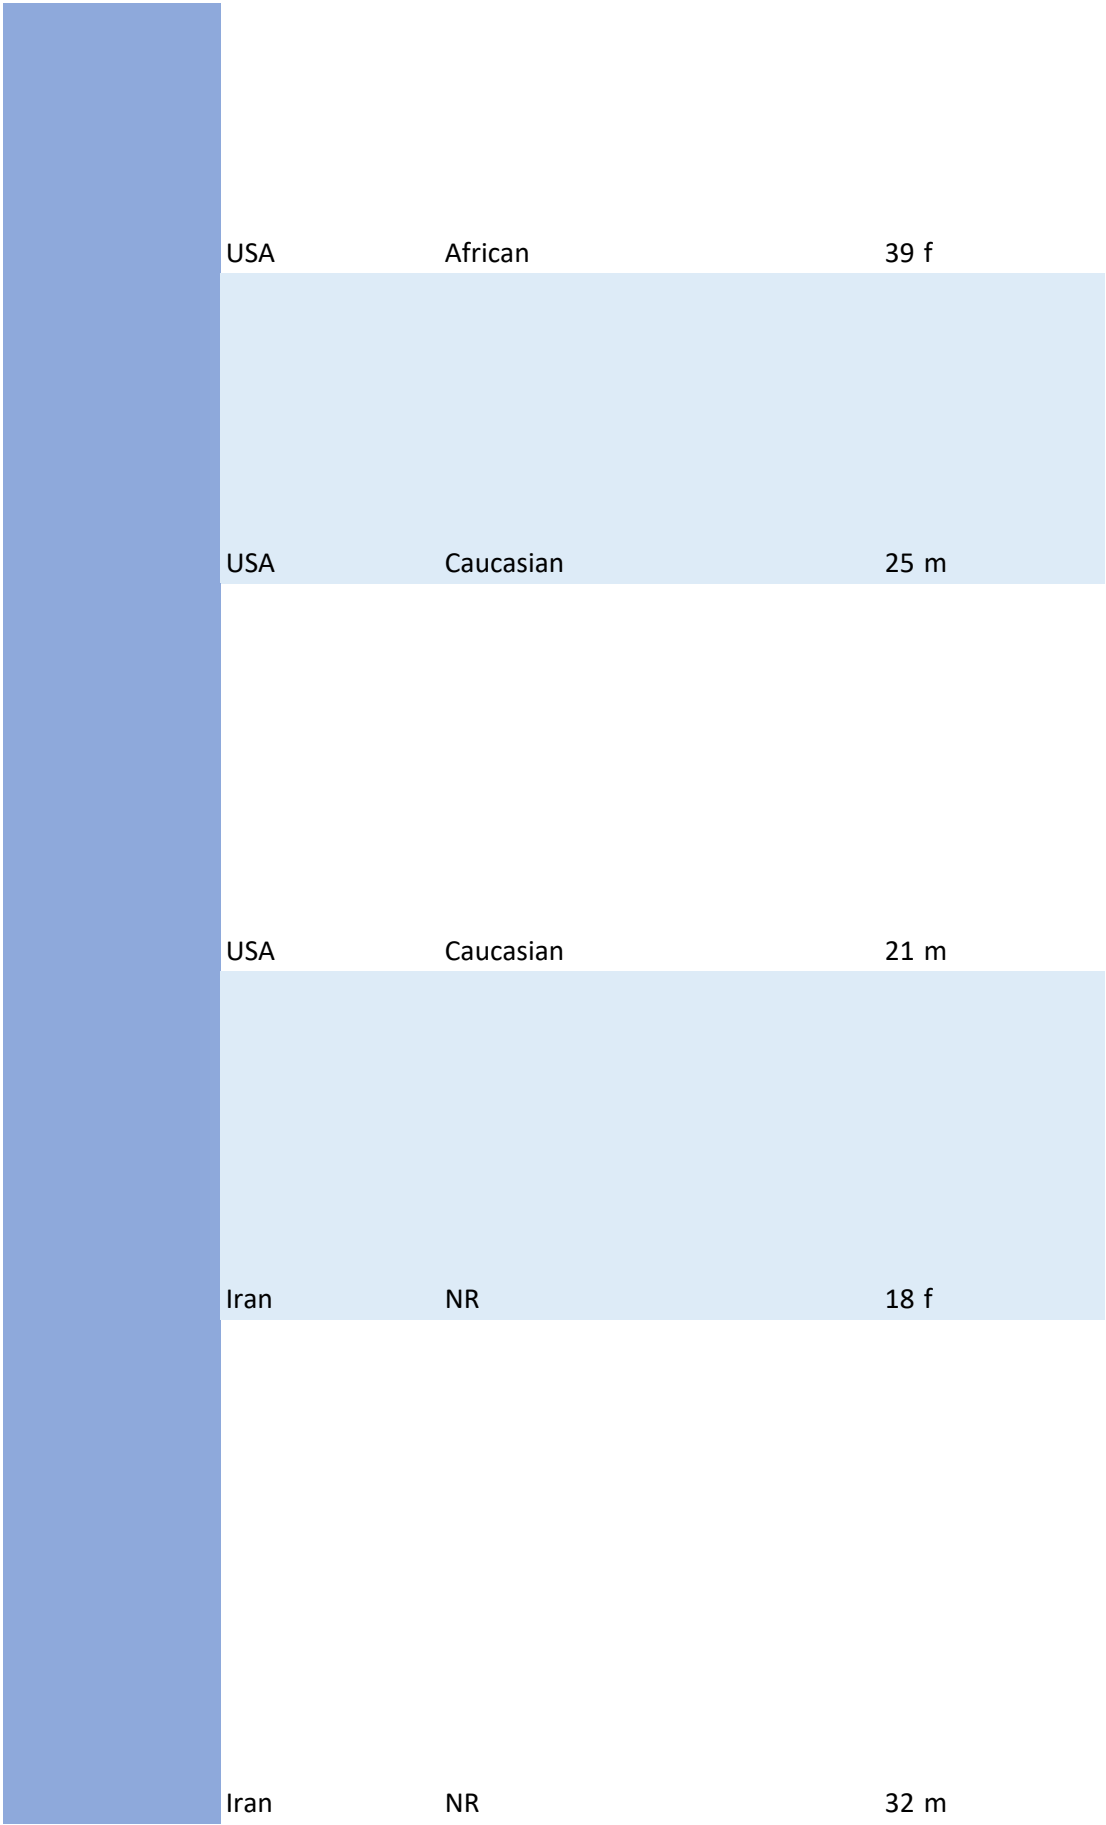

Iran NR 34 f

Iran NR 22 m

Iran NR 45 m

Iran NR 28 m

Iran NR 51 f

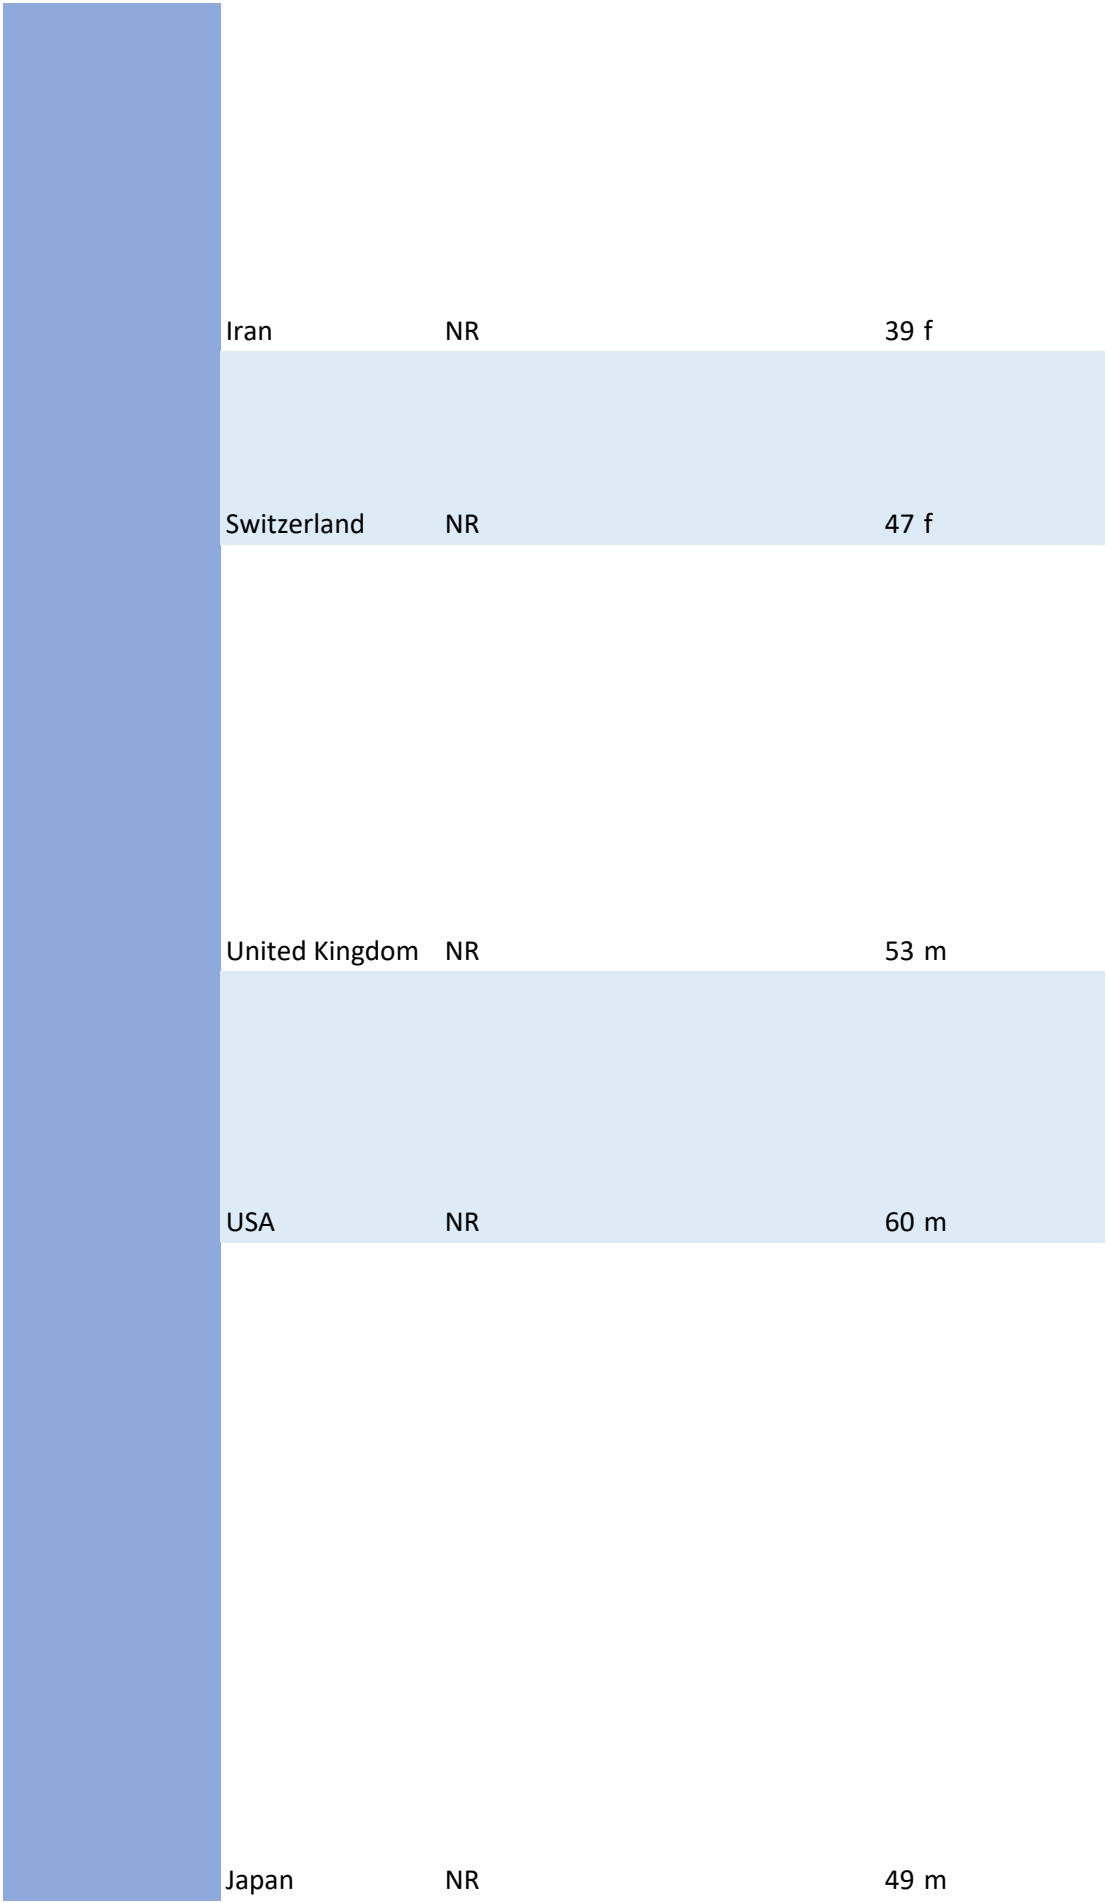

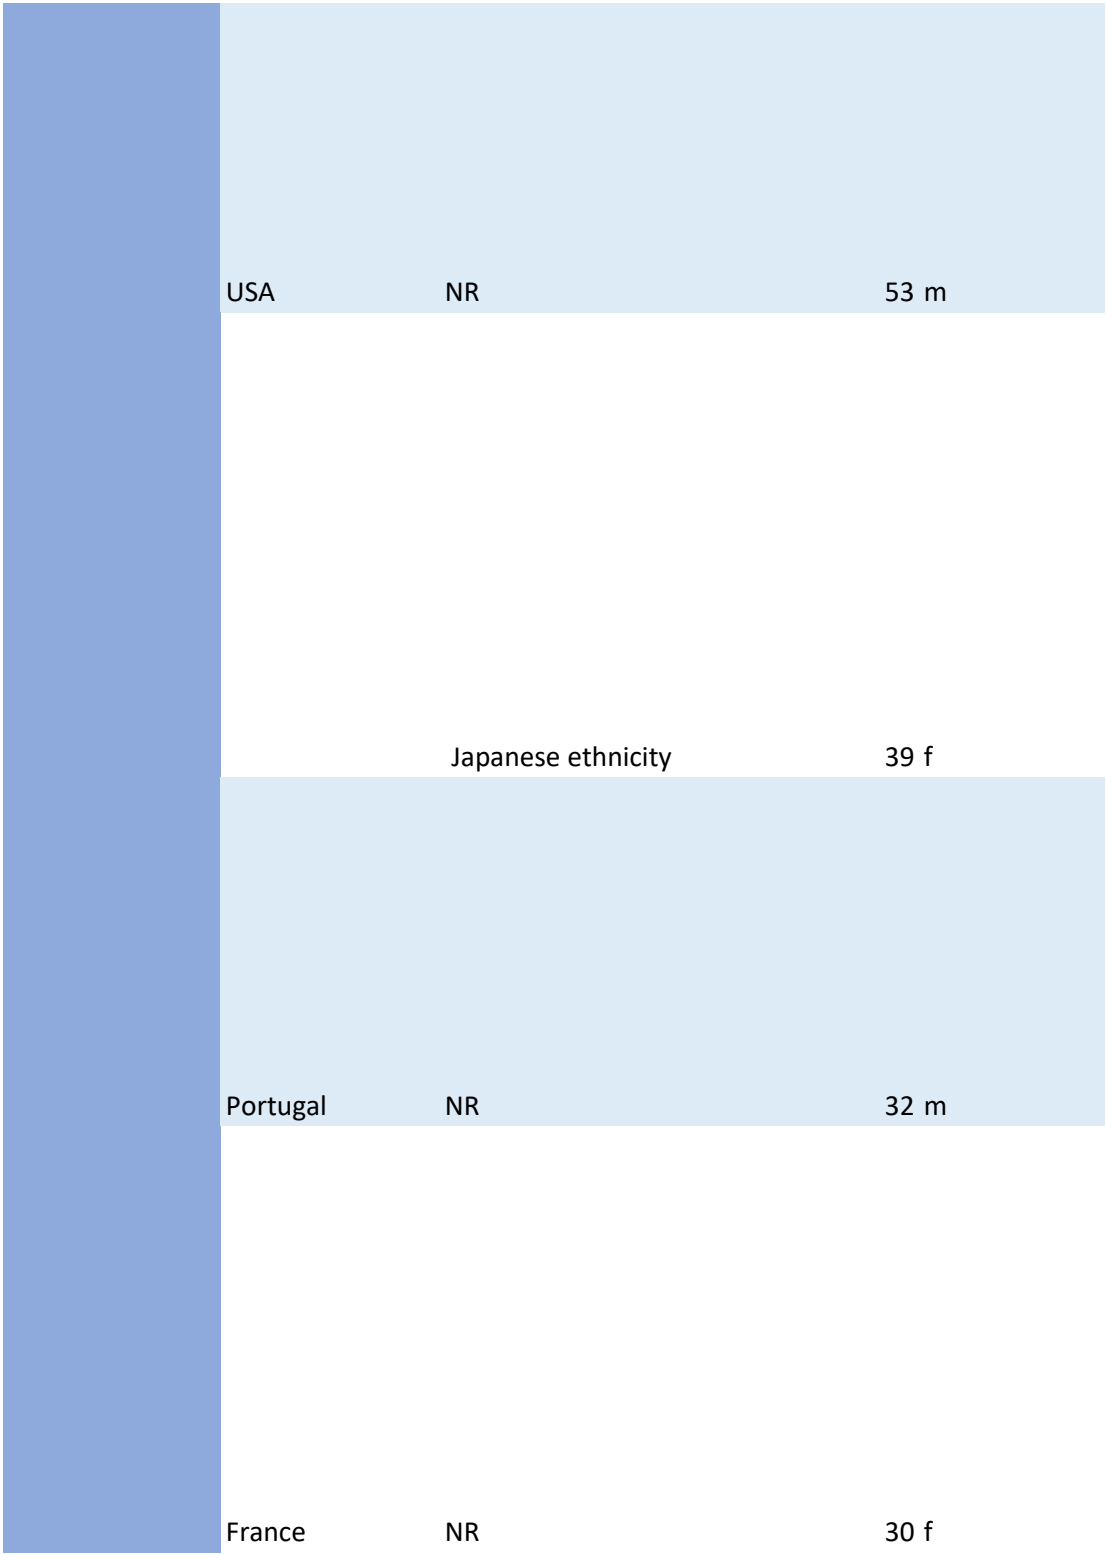

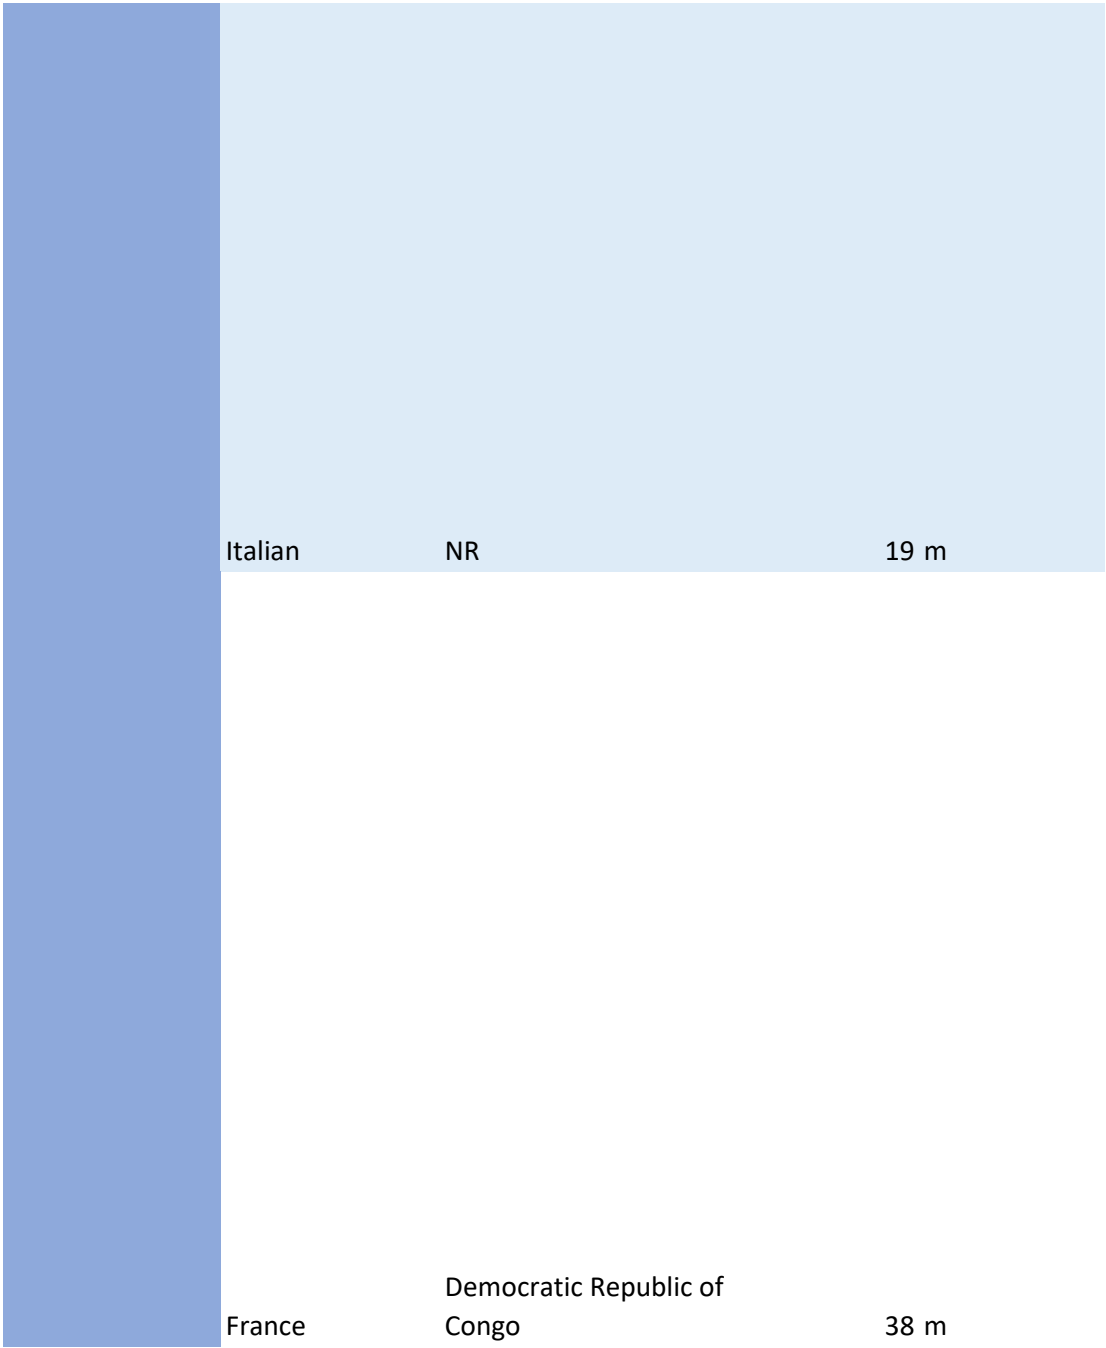

Qatar NR 19/38 m/m

England Afro-Caribbean 50 f

France NR 69 m

Colombia Mestizo 38 f

USA Afro-American 52 m

USA NR 56 m

Spain Uruguay 39 m

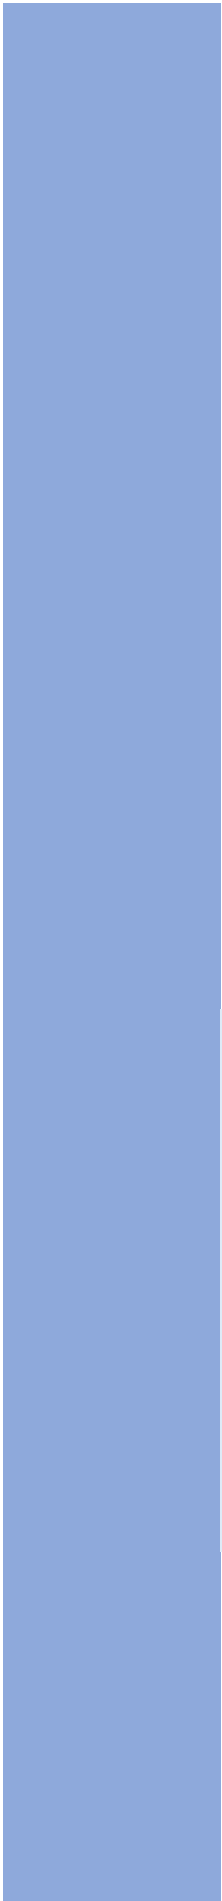

USA

Caucasian

28 f

Germany

NR

39/36

m/m

Germany

NR

18 m

|         |    |      |
|---------|----|------|
| Turkiye | NR | 20 m |
|---------|----|------|

|              |        |      |
|--------------|--------|------|
| South Africa | Indian | 31 m |
|--------------|--------|------|

|        |    |      |
|--------|----|------|
| France | NR | 35 m |
|--------|----|------|

|     |    |      |
|-----|----|------|
| USA | NR | 57 m |
|-----|----|------|

|       |    |      |
|-------|----|------|
| Spain | NR | 59 f |
|-------|----|------|

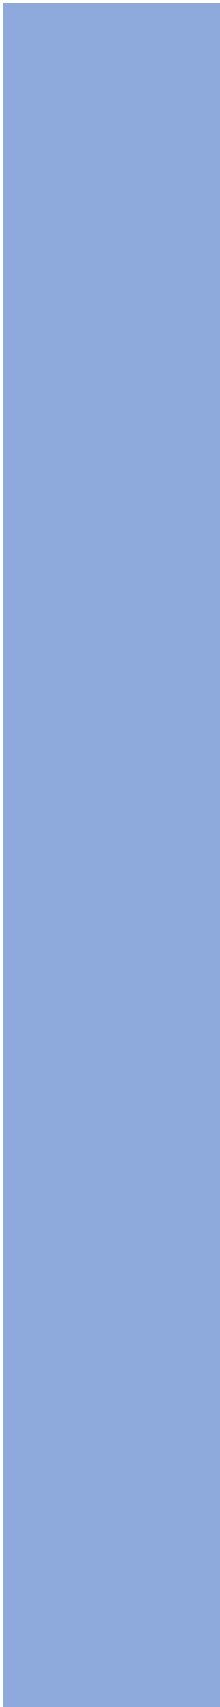

|           |    |      |
|-----------|----|------|
| Italy     | NR | 50 f |
| Iran      | NR | 31 m |
| Poland    | NR | 74 m |
| Iran      | NR | 78 m |
| Australia | NR | 58 m |

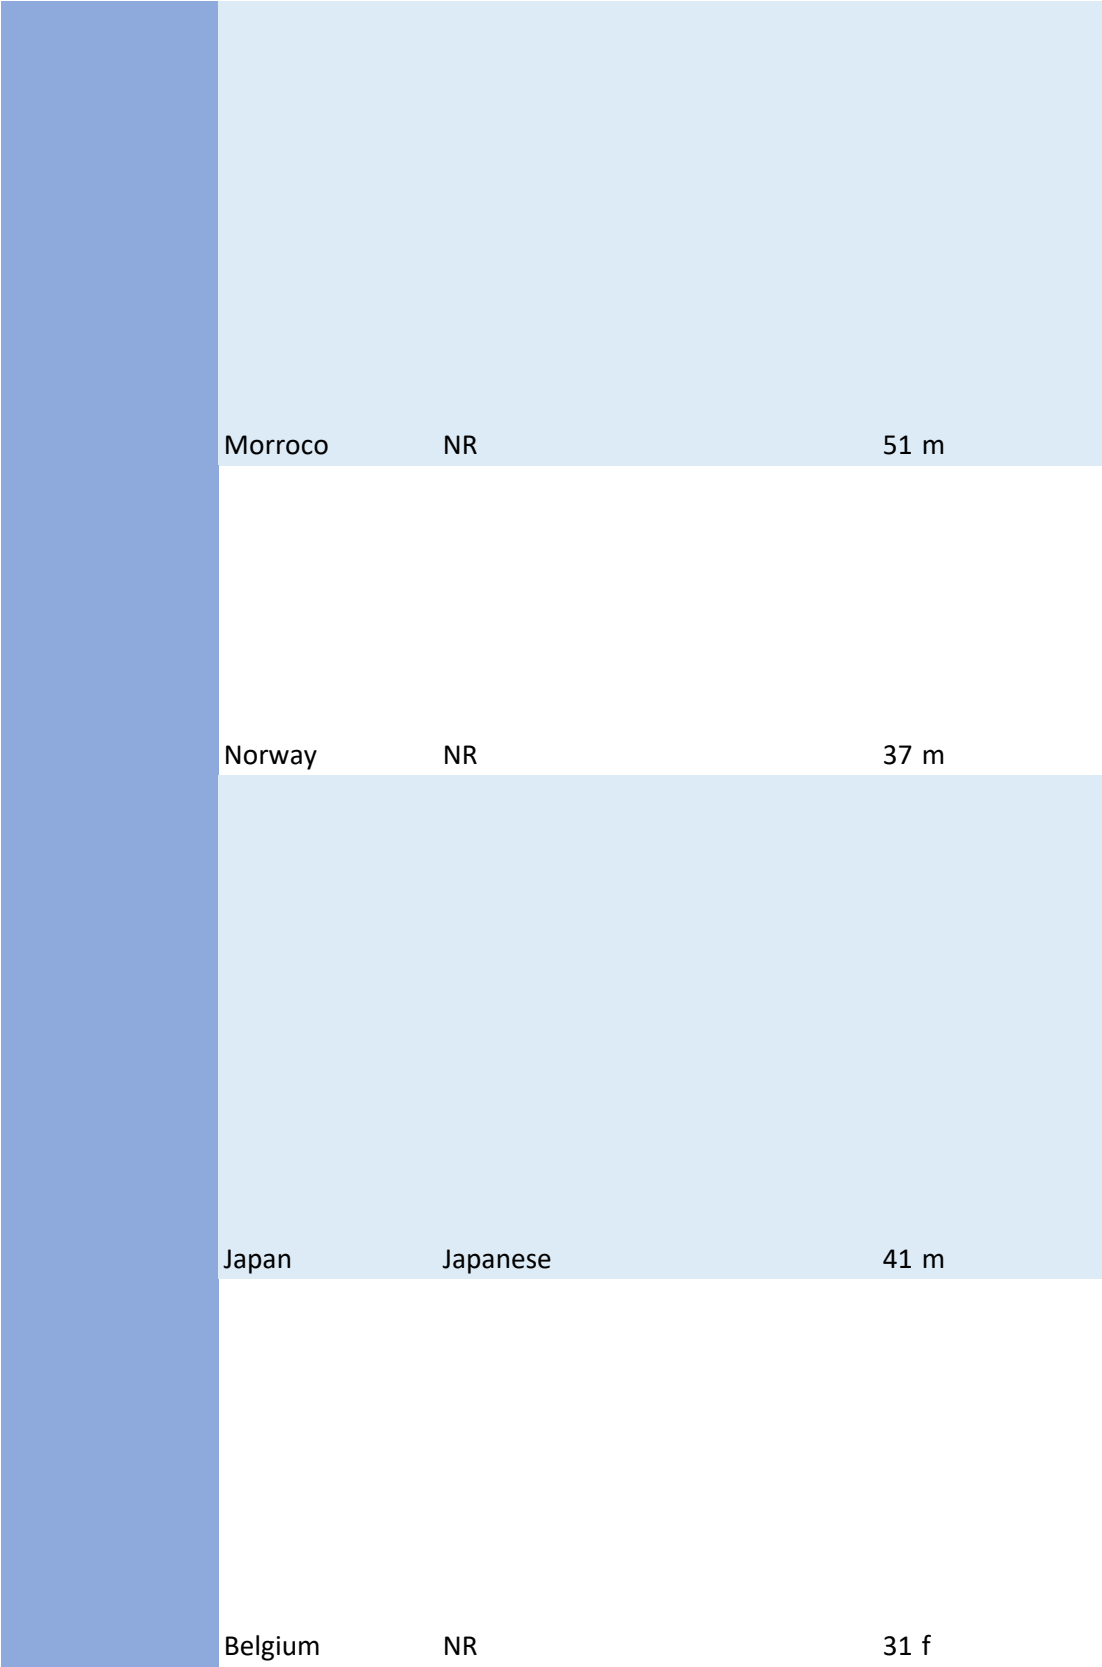

|         |    |      |
|---------|----|------|
| Morroco | NR | 51 m |
|---------|----|------|

|        |    |      |
|--------|----|------|
| Norway | NR | 37 m |
|--------|----|------|

|       |          |      |
|-------|----------|------|
| Japan | Japanese | 41 m |
|-------|----------|------|

|         |    |      |
|---------|----|------|
| Belgium | NR | 31 f |
|---------|----|------|

Poland

Caucasian

43 m

USA

NR

44 m

USA

NR

72 f

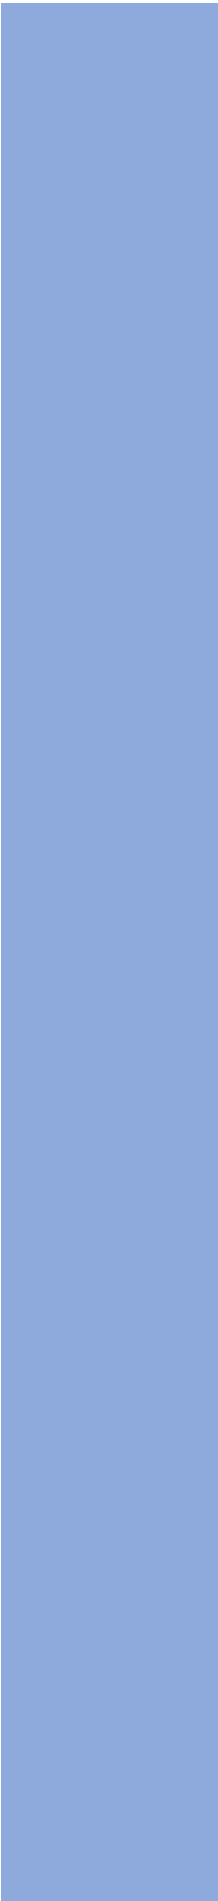

|       |    |      |
|-------|----|------|
| Qatar | NR | 49 f |
|-------|----|------|

|     |    |      |
|-----|----|------|
| USA | NR | 50 m |
|-----|----|------|

|        |    |      |
|--------|----|------|
| France | NR | 40 m |
|--------|----|------|

|         |    |      |
|---------|----|------|
| Germany | NR | 48 m |
|---------|----|------|

|         |    |      |
|---------|----|------|
| Belgium | NR | 48 m |
|---------|----|------|

|     |         |      |
|-----|---------|------|
| USA | Italian | 51 m |
|-----|---------|------|

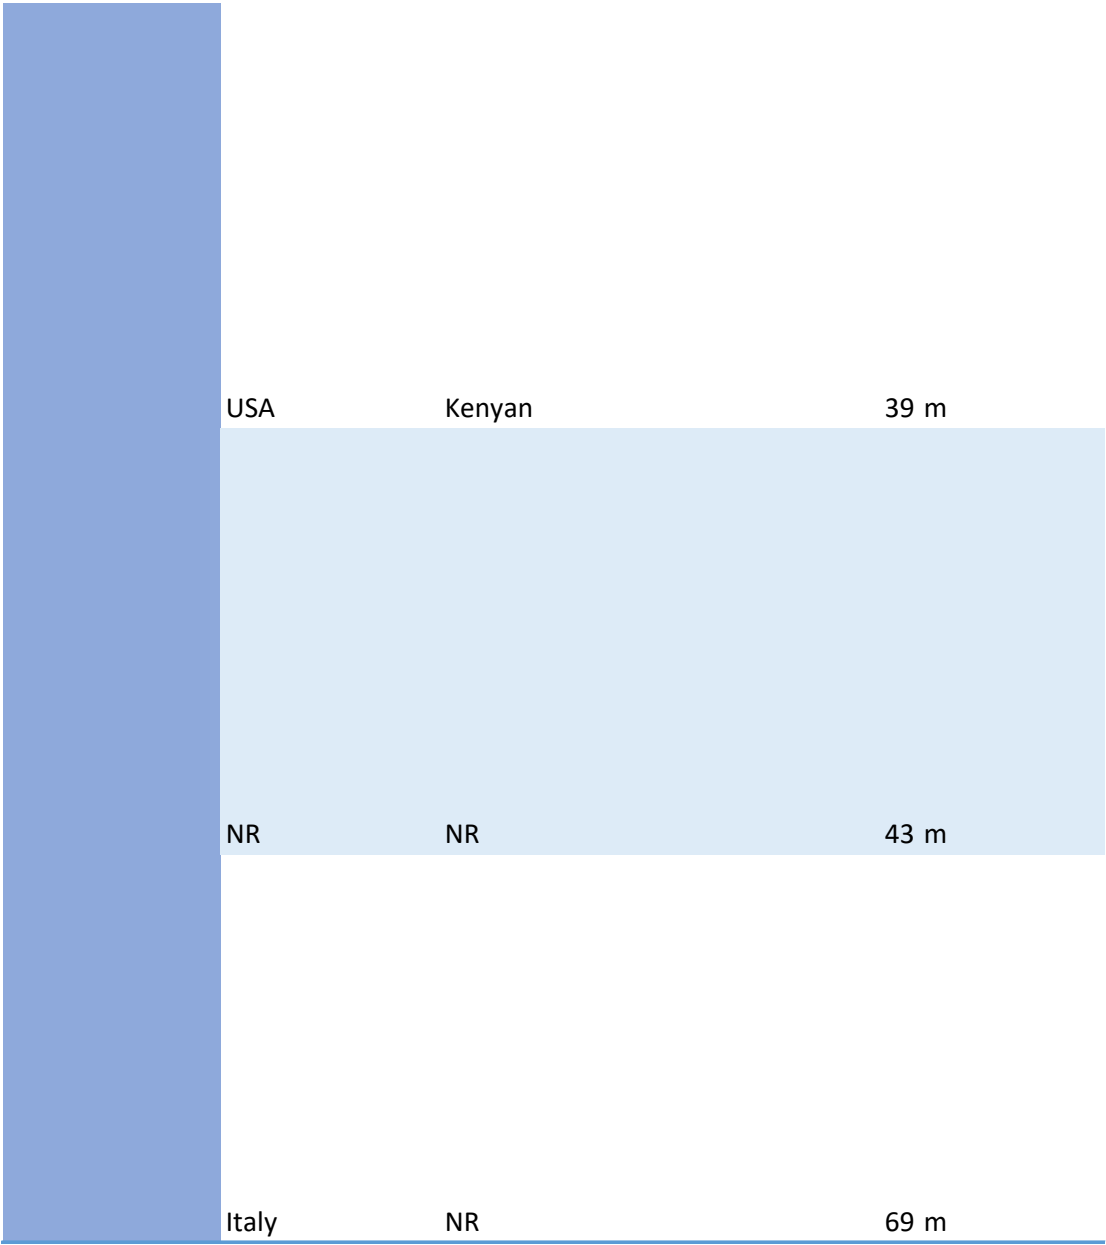

| Clinical characteristic | Reported symptoms                                                     | Physical examination findings (Temp, HR,RR, SpO2%, auscultation findings etc) |
|-------------------------|-----------------------------------------------------------------------|-------------------------------------------------------------------------------|
|                         | vomiting and diarrhoea 7 days before, cough, fever of 39°C, dyspnoea, |                                                                               |
|                         | fatigue, shortness of breath, recurrent syncopes,                     |                                                                               |
|                         | febrile sensation, coughing, sputum, diarrhoea, shortness of breath   |                                                                               |
|                         | oppressive chest pain, dyspnoea                                       |                                                                               |
|                         | recurrent fever, cough, cervical adenopathy, chest pain and dyspnoea  |                                                                               |

NR

no symptoms

acute symptoms of cardiac  
decompensation

severe fatigue, fever and cough  
week before

chest pain and dyspnoea  
for 3 days, accompanied by  
diarrhoea

expectoration of the white  
sputum, shortness of breath,  
chest tightness after activity,

fever, dyspnoea, chest pain,  
diarrhea

dyspnoea, fever, hypotension

dyspnoea, fever

loss of consciousness, fever,  
headache

syncope after an episode of chest  
pain with fever and myalgia,  
dyspnoea, dry cough

losing consciousness, fever and  
headache for six consecutive  
days

dry cough, dyspnoea

fever, dyspnoea, pleuritic chest  
pain

chest pain, fever, dry cough

fever, cough, cardiopulmonary  
arrest

chest pain, cough, orthopnea

oligosymptomatic flu-like disease  
for a week, then - she was found  
unconscious and apneic at home

fever and right upper quadrant  
abdominal pain

8 days of fever, cough, and  
worsening dyspnoea, with mild  
abdominal pain and diarrhoea  
despite completing a 3-day  
course of azithromycin as an  
outpatient. He denied chest pain,  
nausea, or vomiting.

NR

chest pain, diaphoresis, intense fatigue, and body aches

1-day history of profuse diarrhoea, vomiting, abdominal pain, and no respiratory symptoms

acute chest pain, palpitations

fever, chest pain, and worsening dyspnoea for 5 days

worsening of the flu syndrome,  
and showed up with fever,  
cough, accompanied by diarrhea  
and vomits for 3 days.

chest pain and vomiting

7-day history of fever,  
generalized weakness, cough,  
and shortness of breath/ chest  
pain, not related to breathing,  
exertion, or posture

4-day history of central chest  
pain, which was made worse on  
lying flat and on deep inspiration

fever, asthenia, and abdominal  
pain that had been progressing  
for a week.

palpitations that started  
suddenly 3 days prior to  
presentation and were  
associated with haemodynamic  
instability

cough, subjective fever,  
shortness of breath, and a single  
episode of trace hemoptysis over  
the last 5 days

dyspnoea and lethargy

fever, right flank pain and  
diarrhoea of 6 days

tachycardia and hypotension

she was found to be lethargic and covered in coffee ground emesis at home

Breath sounds were clear to auscultation bilaterally. Heart sounds were tachycardic, with a regular rhythm, and no appreciable murmurs. Her abdomen was nondistended, soft, nontender, with a nonpalpable liver and spleen. The patient had no peripheral edema in the extremities, which were cool to touch with 1+ peripheral pulses bilaterally. There were no focal neurological deficits found on the physical examination.

shortness of breath

hyperpyrexia (42°C), chills and tachycardia

febrile sensation  
and chest pain

exertional dyspnoea

chest pain and fatigue

shortness of breath, fevers,  
cough,  
myalgias, decreased appetite,  
nausea, and diarrhea  
for 1 week

feverish feeling that had lasted 5  
days, accompanied by squeezing  
anginal chest pain in the absence  
of respiratory symptoms

fever, dry cough and shortness of breath

dyspnoea on exertion and low-grade fever

hemodynamically unstable new-onset ventricular tachycardia (VT) lasting 12 hours

shortness of breath, cough, anosmia, and myalgia

recent-onset palpitations and progressive dyspnoea

intense epigastric pain at rest and effort, associated with nausea and vomiting progressing for 5 days

bilateral rhonchis

fever, headache and a unilateral, painful neck swelling

redness in the posterior palate and a tender, non-fluctuant swelling extending from the left mandibular angle towards the sternocleidomastoid muscle

general fatigue and a high fever

mild edema

fever, cough, and rapidly progressive shortness of breath. One week earlier, she had experienced an episode of cramping abdominal pain and diarrhea.

tachycardia and bibasal crepitations were noted

Anosmia and ageusia for 1 day, mild fever for a couple of days. All symptoms disappeared completely within a few days. Five weeks later he was admitted to the hospital due to fever with sweats, sore throat, fatigue, dyspnoea, dry cough, and skin changes for 8 days prior to the hospitalization. Additionally, he reported discomfort in the right lower abdomen, discoloured stools, and dark-colored urine.

dry cough associated with generalized body ache but denied any chest pain, shortness of breath, palpitation, orthopnea, or fever

worsening shortness of breath,

cough, shortness of breath

fevers, chills, generalized  
malaise, non-productive cough,  
dyspnoea for  
3-4 days and an episode of near-  
syncope

fever, odynophagia, and left neck  
pain

high-grade fever, dyspnoea and  
haemoptysis

fever, diarrhoea, cough,  
dysosmia, and dyspnoea

dry cough, fatigue, dyspnoea,  
and a fever

midsternal chest pain

fever for 14 days, dry cough,  
haemoptoic sputum,

worsening dyspnoea, persistent  
cough, weakness since 4 days,

| Temp [°C] | HR [/min] | RR [mmHg] | SPO2[%] | auscultation findings | other |
|-----------|-----------|-----------|---------|-----------------------|-------|
| 39.0      | NR        | NR        | 98.2    | NR                    | NR    |

|      |    |           |      |                   |    |
|------|----|-----------|------|-------------------|----|
| 35.6 |    | 75 101/64 | 94.0 | moderate wheezing | NR |
| NR   | NR | NR        | NR   | NR                | NR |

|      |  |           |      |                                                   |    |
|------|--|-----------|------|---------------------------------------------------|----|
| 37.7 |  | 79 120/80 | 89.0 | decreased breath sounds at lung bases with ronchi | NR |
| 39.0 |  | 140 81/43 | NR   | NR                                                | NR |

|      |    |           |    |    |                                                             |
|------|----|-----------|----|----|-------------------------------------------------------------|
| 36.6 |    | 147 73/34 | NR | NR | ABG pO2<br>82mmHg, pCO2<br>32mmHg<br>PaO2/FiO2 ratio<br>166 |
| NR   | NR | NR        | NR | NR | NR                                                          |

|      |    |           |      |    |                                                                      |
|------|----|-----------|------|----|----------------------------------------------------------------------|
| NR   | NR | NR        | NR   | NR | NR                                                                   |
| 36.6 |    | 100 90/50 | 96.0 | NR | ABG pH: 7.46,<br>pO2 82mmHg,<br>pCO2 32mmHg,<br>lactate<br>17.1mg/dL |

|      |    |       |      |    |                                                                                                 |
|------|----|-------|------|----|-------------------------------------------------------------------------------------------------|
| NR   | NR | 80/50 | NR   | NR | CKMB 112.9 ng/L                                                                                 |
| 39.3 | NR | NR    | 91.8 | NR | ABG: pH 7.049,<br>PCO2<br>76,4mmHg, PO2<br>66,2mmHg; ALT<br>97 U/L;<br>creatinine 157<br>umol/L |

|      |            |    |    |    |
|------|------------|----|----|----|
| NR   | 130 MAP 53 | NR | NR | NR |
| 40.5 | 155 MAP 55 | NR | NR | NR |

|      |            |        |       |        |
|------|------------|--------|-------|--------|
| 39.8 | 135 MAP 55 | normal | NR    | NR     |
| 36.8 | 110 80/60  | 80.0   | rales | GCS 11 |

|      |           |      |    |        |
|------|-----------|------|----|--------|
| 36.8 | 120 85/60 | 80.0 | NR | GCS 13 |
|------|-----------|------|----|--------|

|      |           |      |    |       |
|------|-----------|------|----|-------|
| 36.7 | 114 80/60 | 82.0 | NR | GCS 8 |
|------|-----------|------|----|-------|

|      |           |      |    |    |
|------|-----------|------|----|----|
| 36.8 | 120 70/50 | 90.0 | NR | NR |
|------|-----------|------|----|----|

|      |           |      |    |    |
|------|-----------|------|----|----|
| 38.5 | 90 100/70 | 85.0 | NR | NR |
|------|-----------|------|----|----|

|      |           |      |    |    |
|------|-----------|------|----|----|
| 36.8 | 92 100/60 | 92.0 | NR | NR |
|------|-----------|------|----|----|

|    |    |    |    |    |    |
|----|----|----|----|----|----|
| NR | NR | NR | NR | NR | NR |
|----|----|----|----|----|----|

|      |    |     |        |      |    |    |
|------|----|-----|--------|------|----|----|
| 37.2 |    | 125 | 100/60 | 90.0 | NR | NR |
| NR   | NR | NR  | NR     | NR   | NR | NR |

| NR                                                     | NR | NR | NR   | NR                            | NR |
|--------------------------------------------------------|----|----|------|-------------------------------|----|
| afebrile<br>with<br>maximum<br>temperatur<br>e of 37.4 | 96 | NR | 87.0 | clear lungs and<br>tachypnoea | NR |

|    |    |    |    |    |    |
|----|----|----|----|----|----|
| NR | NR | NR | NR | NR | NR |
|----|----|----|----|----|----|

|      |           |      |    |                                     |
|------|-----------|------|----|-------------------------------------|
|      |           |      |    |                                     |
| 38.9 | 132 77/46 | 90.0 | NR | respiratory rate,<br>26 breaths/min |

|      |           |      |                                                                      |  |
|------|-----------|------|----------------------------------------------------------------------|--|
|      |           |      |                                                                      |  |
| 36.6 | 120 82/69 | 98.0 | normal heart<br>sounds with no<br>murmurs, no<br>pericardial rub, NR |  |

|      |           |      |    |    |
|------|-----------|------|----|----|
|      |           |      |    |    |
| 36.6 | 200 77/41 | 98.0 | NR | NR |

|    |           |      |    |    |
|----|-----------|------|----|----|
| NR | 110 80/50 | 96.0 | NR | NR |
|----|-----------|------|----|----|

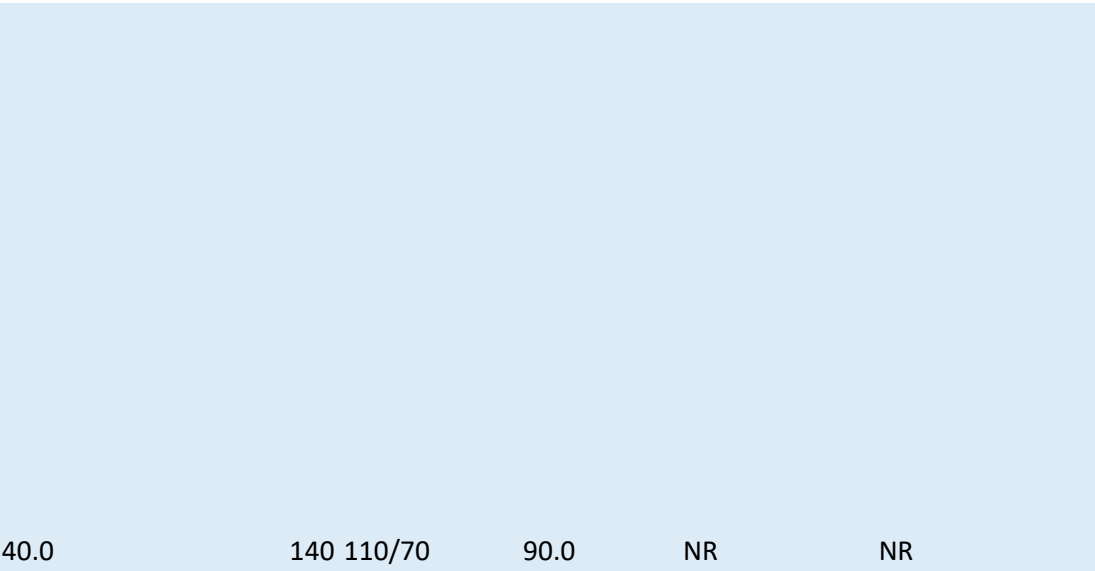

NR      130 NR      NR      NR      NR

|      |          |                   |            |                           |    |
|------|----------|-------------------|------------|---------------------------|----|
|      |          |                   |            |                           |    |
| 38.3 | 126/ 102 | 76/44 /<br>121/93 | 92.0/ 98.0 | not significant<br>(both) | NR |

|          |    |           |      |        |    |
|----------|----|-----------|------|--------|----|
| afebrile |    | 85 116/74 | 97.0 | normal | NR |
|          |    |           |      |        |    |
| NR       | NR | NR        | NR   | NR     | NR |

|      |           |      |                                          |    |
|------|-----------|------|------------------------------------------|----|
| 36.5 | 137 98/54 | 95.0 | oft inspiratory<br>crackles<br>bibasally | NR |
|------|-----------|------|------------------------------------------|----|

|      |  |             |      |                          |    |
|------|--|-------------|------|--------------------------|----|
|      |  |             |      |                          |    |
| 36.7 |  | 118 161/109 | 87.0 | trace bibasilar<br>rales | NR |

|      |             |             |      |    |    |
|------|-------------|-------------|------|----|----|
| NR   | NR          | NR          | 66.0 | NR | NR |
| 38.6 | tachycardia | hypotension | NR   | NR | NR |

|          |    |           |                                       |        |    |
|----------|----|-----------|---------------------------------------|--------|----|
| afebrile |    | 144 70/38 | 90.0 on 15L<br>nonrebreath<br>er mask | normal | NR |
| NR       | NR | NR        | NR                                    | NR     | NR |
| 42.0     | NR | NR        | NR                                    | NR     | NR |

|      |  |            |      |    |    |
|------|--|------------|------|----|----|
|      |  |            |      |    |    |
| 39.0 |  | 111 146/63 | 97.0 | NR | NR |

|    |    |           |      |    |    |
|----|----|-----------|------|----|----|
| NR |    | 76 122/76 | 85.0 | NR | NR |
| NR | NR | NR        | NR   | NR | NR |

|    |    |       |      |                               |    |
|----|----|-------|------|-------------------------------|----|
| NR | NR | NR    | NR   | NR                            | NR |
|    |    |       |      |                               |    |
| NR | NR | 75/53 | 96.0 | normal pulmonary auscultation | NR |

|      |    |        |      |    |    |
|------|----|--------|------|----|----|
| NR   | 75 | NR     | NR   | NR | NR |
| 37.8 | 70 | 110/80 | 96.0 | NR | NR |

|      |     |        |      |    |    |
|------|-----|--------|------|----|----|
| NR   | NR  | NR     | NR   | NR | NR |
| 37.2 | 110 | 170/85 | 72.0 | NR | NR |

|    |     |        |      |                           |    |
|----|-----|--------|------|---------------------------|----|
| NR | 152 | 117/97 | 97.0 | bibasal fine crepitations | NR |
|----|-----|--------|------|---------------------------|----|

|      |    |        |      |                       |    |
|------|----|--------|------|-----------------------|----|
| 37.2 | 19 | 123/60 | 70.0 | bilateral<br>rhonchis | NR |
|------|----|--------|------|-----------------------|----|

|      |     |        |     |              |    |
|------|-----|--------|-----|--------------|----|
| 41.0 | 115 | 119/76 | 100 | unremarkable | NR |
|------|-----|--------|-----|--------------|----|

|      |     |        |    |    |    |
|------|-----|--------|----|----|----|
| 38.2 | 132 | 124/72 | NR | NR | NR |
|------|-----|--------|----|----|----|

|    |             |    |    |    |    |
|----|-------------|----|----|----|----|
| NR | tachycardia | NR | NR | NR | NR |
|----|-------------|----|----|----|----|



|    |    |    |    |    |    |
|----|----|----|----|----|----|
| NR | NR | NR | NR | NR | NR |
| NR | NR | NR | NR | NR | NR |

|      |     |        |    |    |                                            |
|------|-----|--------|----|----|--------------------------------------------|
| 39.9 | 123 | 110/60 | NR | NR | tonsillitis with<br>cervical<br>adenopathy |
| 39.0 | 100 | 90/65  | NR | NR | NR                                         |

|      |    |        |      |                                      |    |
|------|----|--------|------|--------------------------------------|----|
| 38.6 | NR | NR     | 87.0 | NR                                   | NR |
| 39.6 | 97 | 141/89 | 91.0 | bilateral<br>wheezing and<br>rhonchi | NR |

|      |        |           |        |    |    |
|------|--------|-----------|--------|----|----|
| 36.6 | stable | stable    | stable | NR | NR |
| 36.8 |        | 77 135/80 | 91.0   | NR | NR |

|    |    |    |    |    |    |
|----|----|----|----|----|----|
| NR | NR | NR | NR | NR | NR |
|----|----|----|----|----|----|

---

| Medical history<br>(comorbidities,<br>previous surgeries,<br>events) | Vaccination status<br>(yes/no/not<br>completed) | Type of vaccine | Type of vaccination (producer) |
|----------------------------------------------------------------------|-------------------------------------------------|-----------------|--------------------------------|
| hypertension                                                         | no                                              |                 |                                |

|        |    |  |  |
|--------|----|--|--|
| asthma | no |  |  |
| NR     | no |  |  |

|    |    |  |  |
|----|----|--|--|
| NR | no |  |  |
| NR | no |  |  |

|                                       |    |
|---------------------------------------|----|
| NR                                    | no |
| hypertension, prostate adenocarcinoma |    |
|                                       | no |

|                                               |    |
|-----------------------------------------------|----|
| 6 years post heart transplantation            | no |
| No previous history of cardiovascular disease |    |
|                                               | no |

|                                                      |    |
|------------------------------------------------------|----|
| NR                                                   | no |
| allergic cough for 5 years, previous smoking history |    |
|                                                      | no |

|    |    |    |    |
|----|----|----|----|
| NR | NR | NR | NR |
| NR | NR | NR | NR |

|    |    |    |    |
|----|----|----|----|
| NR | NR | NR | NR |
| NR | NR | NR | NR |

|    |    |    |    |
|----|----|----|----|
| NR | NR | NR | NR |
|----|----|----|----|

NR

NR

NR

NR

No previous medical  
history

NR

|                                                     |    |    |    |
|-----------------------------------------------------|----|----|----|
| asthma                                              | NR | NR | NR |
| obesity [body mass index (BMI) 31.6],<br>depression | NR | NR | NR |

|                                     |    |   |   |
|-------------------------------------|----|---|---|
| No previous medical hi              | NR | - | - |
| hypertension and<br>hyperlipidaemia | NR | - | - |

|                        |                                                          |    |    |
|------------------------|----------------------------------------------------------|----|----|
| No previous medical hi | first dose of COVID-19<br>vaccination (9 days<br>before) | NR | NR |
|------------------------|----------------------------------------------------------|----|----|

No previous medical hi NR

NR

NR

laparotomy with  
ovarian cystectomy no

After covid-19  
exhibited only dry  
cough and  
odynophagia, which  
resolved after  
symptomatic  
treatment with  
paracetamol.

otherwise healthy NR

NR

NR

No previous medical hi NR

NR

NR

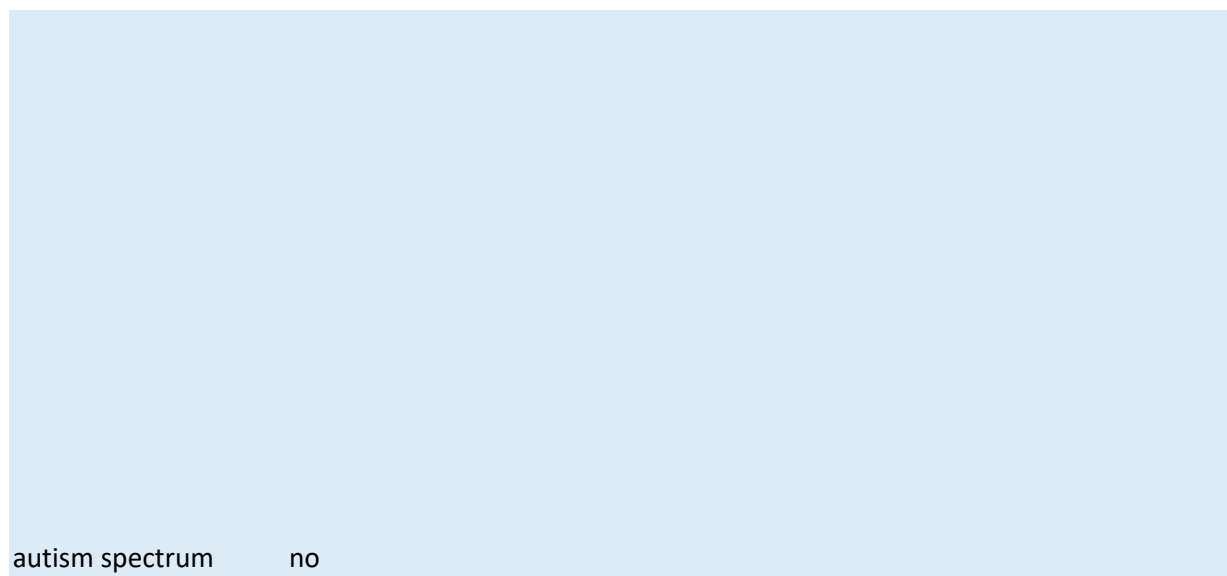

autism spectrum      no

suggested chronic  
lymphopenia      no

No previous medical hi no

hypertension,  
previous myocarditis,  
reactive arthritis      no

diabetes,  
hypertension,  
ischemic heart  
disease      no

No previous medical hi no

hypertension,  
previous myocarditis,  
reactive arthritis      no

obesity,  
hyperlipidemia      no

former smoker, 68 g  
daily alcohol use      no

diabetes mellitus type  
1, diabetic  
gastroparesis,  
asthma, anxiety,  
depression with  
multiple previous  
episodes of DKA,  
questionable history  
of IV drug use           no

Both patients were  
obese and had a  
history of upper  
airway infection with  
headache, fever, and  
cough up to 4 weeks  
before admission.A;  
dyslipidemia B:  
hypertension,  
smoking dyslipidemia,  
CAD heart failure,  
lung disease           no

NR                           no

NR

no

NR

no

NR

no

hypertension

no

hypertension, cervical  
degenerative  
arthropathy, chronic  
lumbar radiculopathy,  
lymph node  
tuberculosis  
diagnosed due to  
erythema nodosum,  
and migraine

no

|    |    |
|----|----|
| no | no |
|    |    |
| NR | no |

|                                                                                                                                     |    |
|-------------------------------------------------------------------------------------------------------------------------------------|----|
| atrial fibrillation,<br>catheter ablation<br>performed 3 times,<br>arterial hypertension,<br>type 2 diabetes, and<br>hypothyroidism | no |
|                                                                                                                                     |    |
| hypertension                                                                                                                        | no |

No previous medical hi no

hyperthyroidism      NR                      NR                      NR

No previous medical hi NR

hypertension      no

No previous medical hi NR

|                           |  |  |  |  |
|---------------------------|--|--|--|--|
| No previous medical hi NR |  |  |  |  |
|---------------------------|--|--|--|--|

NSTEMI 2 weeks  
before, COVID  
pneumonia 1 month  
ago NR

|                                                                    |  |  |  |  |
|--------------------------------------------------------------------|--|--|--|--|
| hypertension, chronic<br>obstructive<br>pulmonary disease NR NR NR |  |  |  |  |
|--------------------------------------------------------------------|--|--|--|--|

|                                   |    |    |    |
|-----------------------------------|----|----|----|
| NR                                | NR | NR | NR |
| hypertension and ischemic stroke. |    |    |    |
|                                   | NR | NR | NR |

|                    |    |    |    |
|--------------------|----|----|----|
| obesity (BMI 34.8) | NR | NR | NR |
|                    |    |    |    |
| NR                 | no |    |    |

|              |    |  |  |
|--------------|----|--|--|
| hypertension | no |  |  |
|              |    |  |  |
| hypertension | no |  |  |

NR

no

NR

no

NR

no

---

| Diagnostics | Covid-19 confirmation technique (PCR, serology etc.) | myocarditis during COVID (yes/no) |
|-------------|------------------------------------------------------|-----------------------------------|
|             | PCR                                                  | yes                               |
|             | PCR                                                  | no                                |

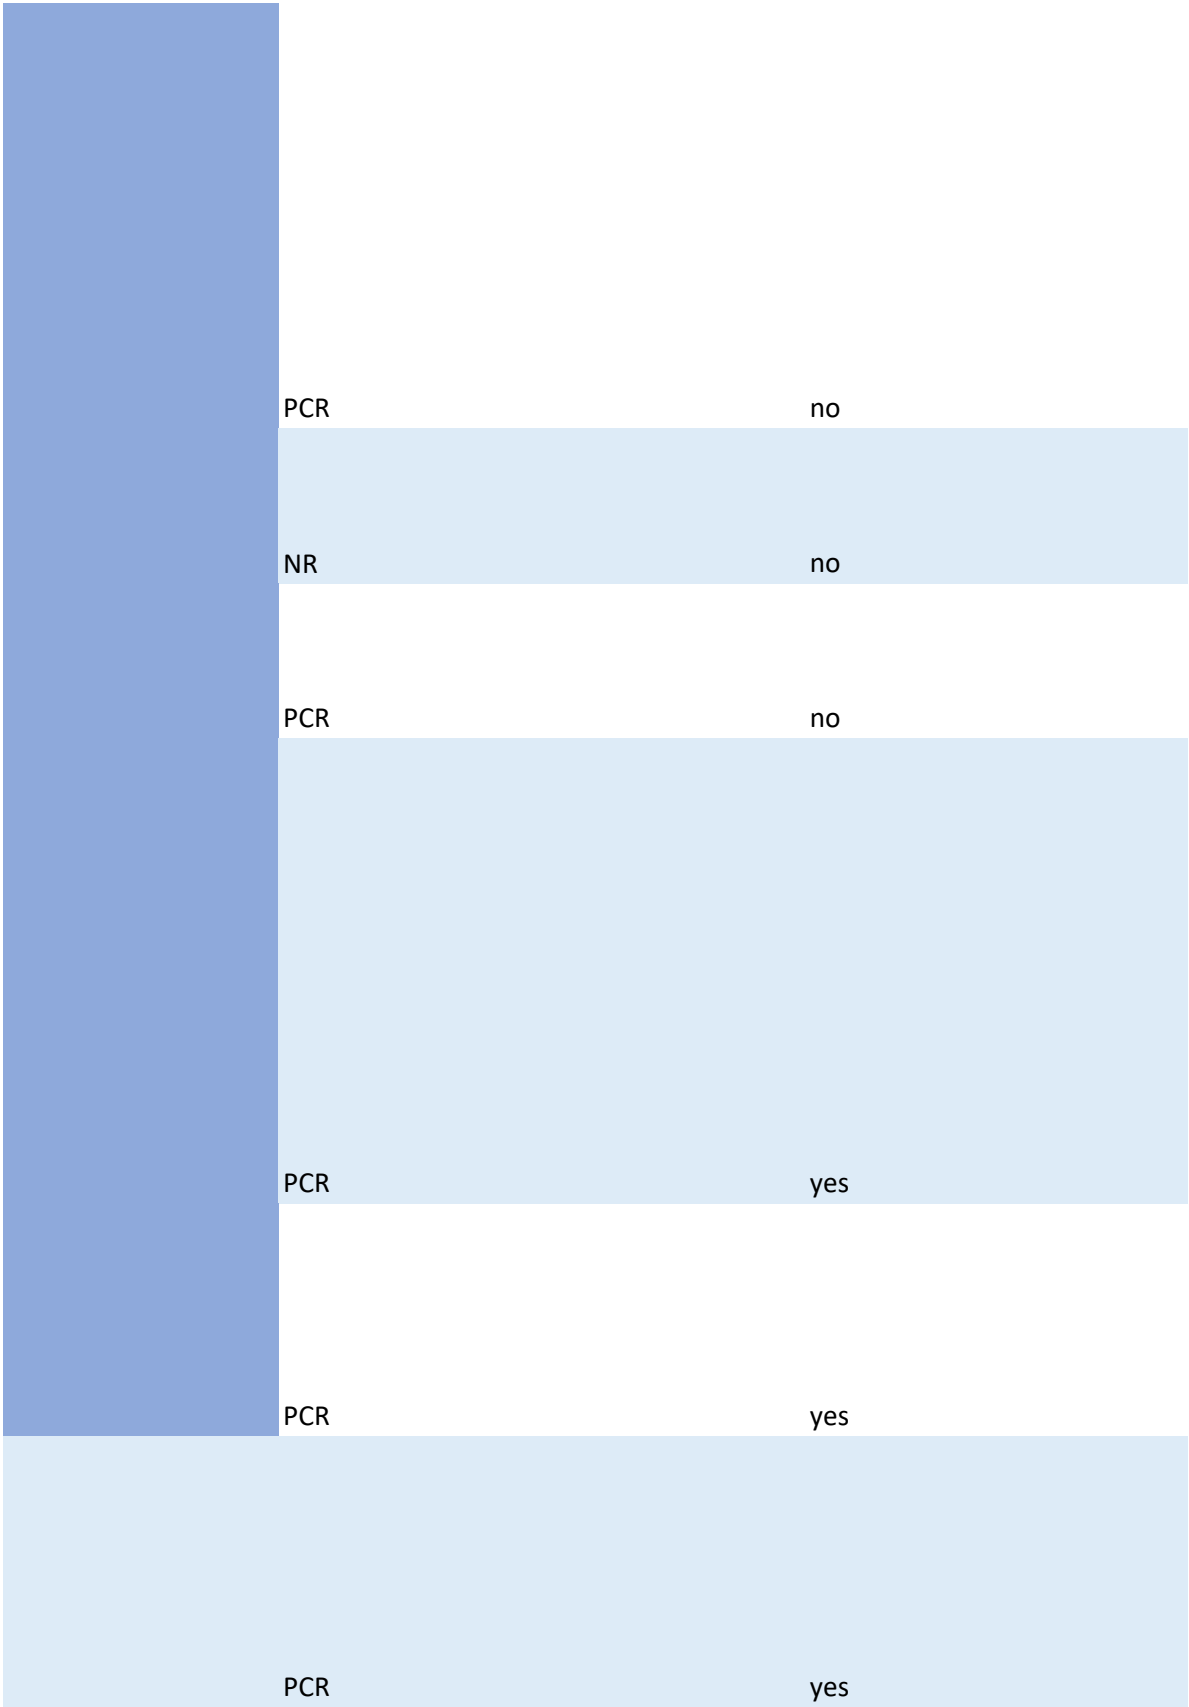

NR

no

NR

no

PCR

yes

antigen test on the nasopharyngeal swab    yes

PCR

no

PCR

yes

NR

no

PCR

yes

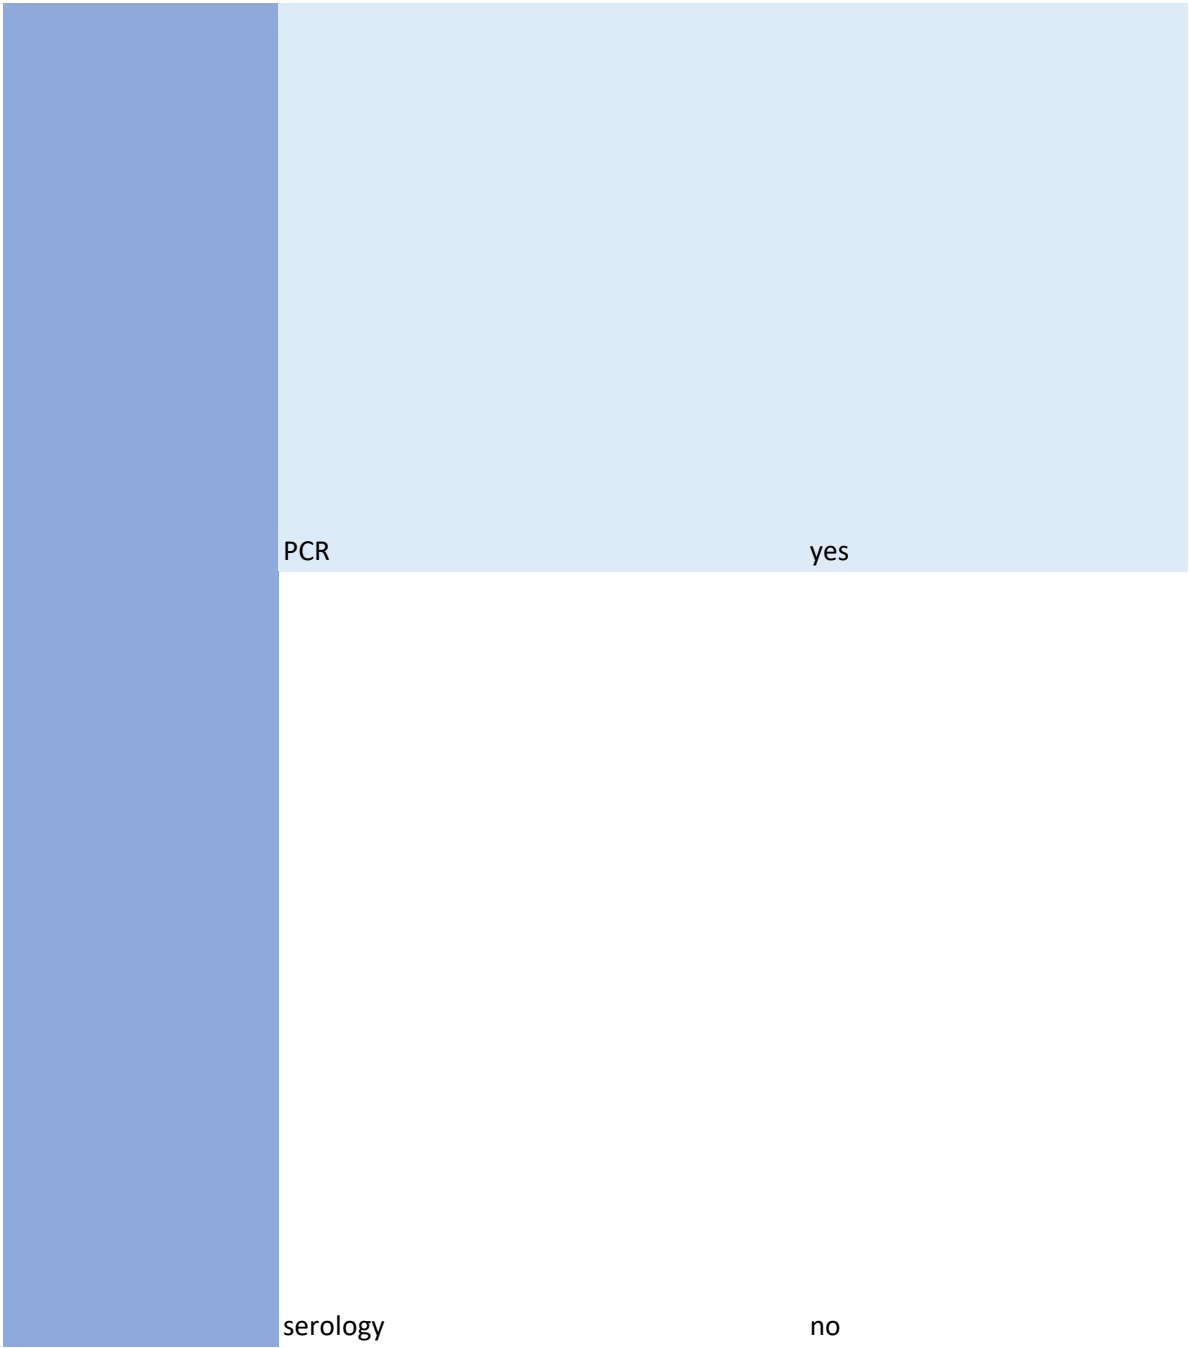

Nasopharyngeal swab/ COVID prior to  
myocarditis

yes/no

PCR

no

COVID found in biopsy

no

PCR

yes

PCR

yes

rapid antigen test

yes

serology

yes

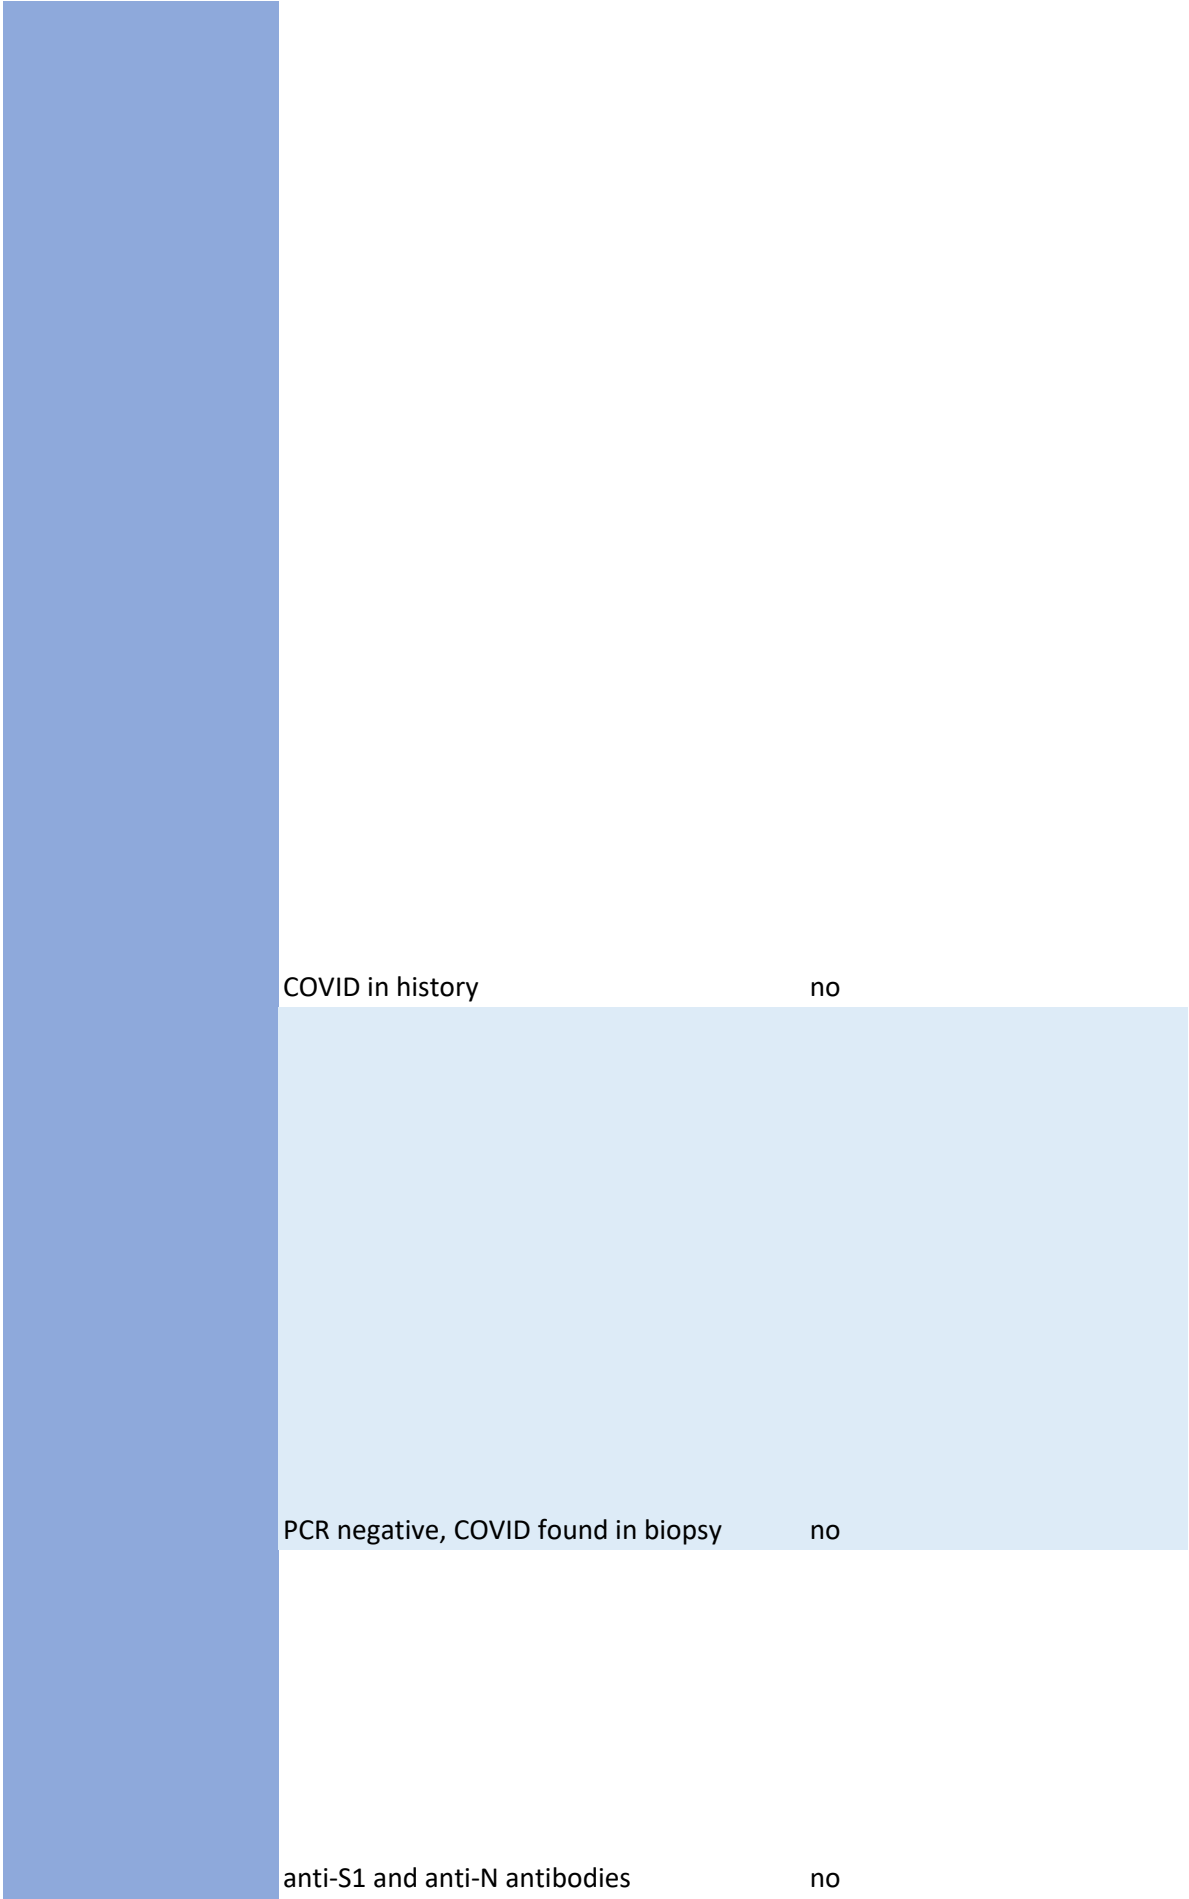

COVID in history

no

PCR negative, COVID found in biopsy

no

anti-S1 and anti-N antibodies

no

|                                       |     |
|---------------------------------------|-----|
|                                       |     |
| Nasopharyngeal swab                   | yes |
|                                       |     |
| NR                                    | no  |
| PCR                                   | yes |
|                                       |     |
| tested positive, type of test unknown | yes |
|                                       |     |
| PCR                                   | yes |

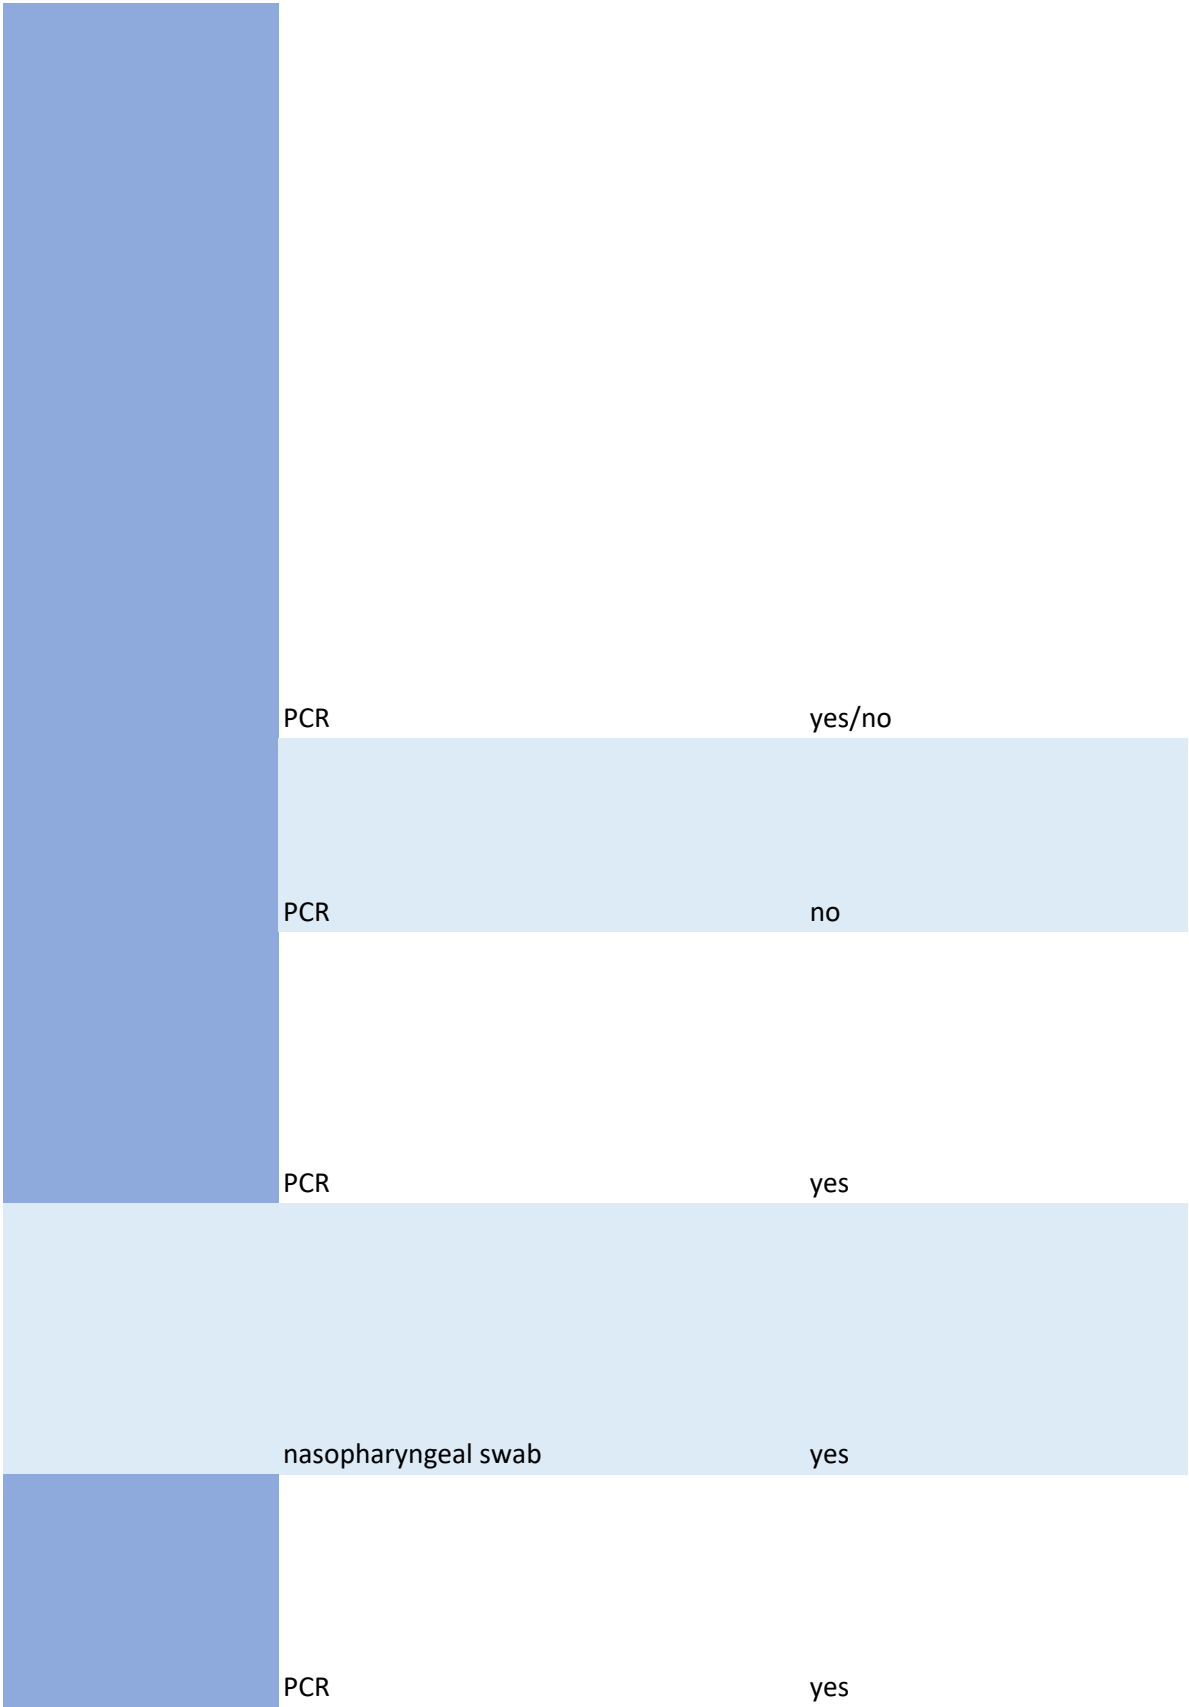

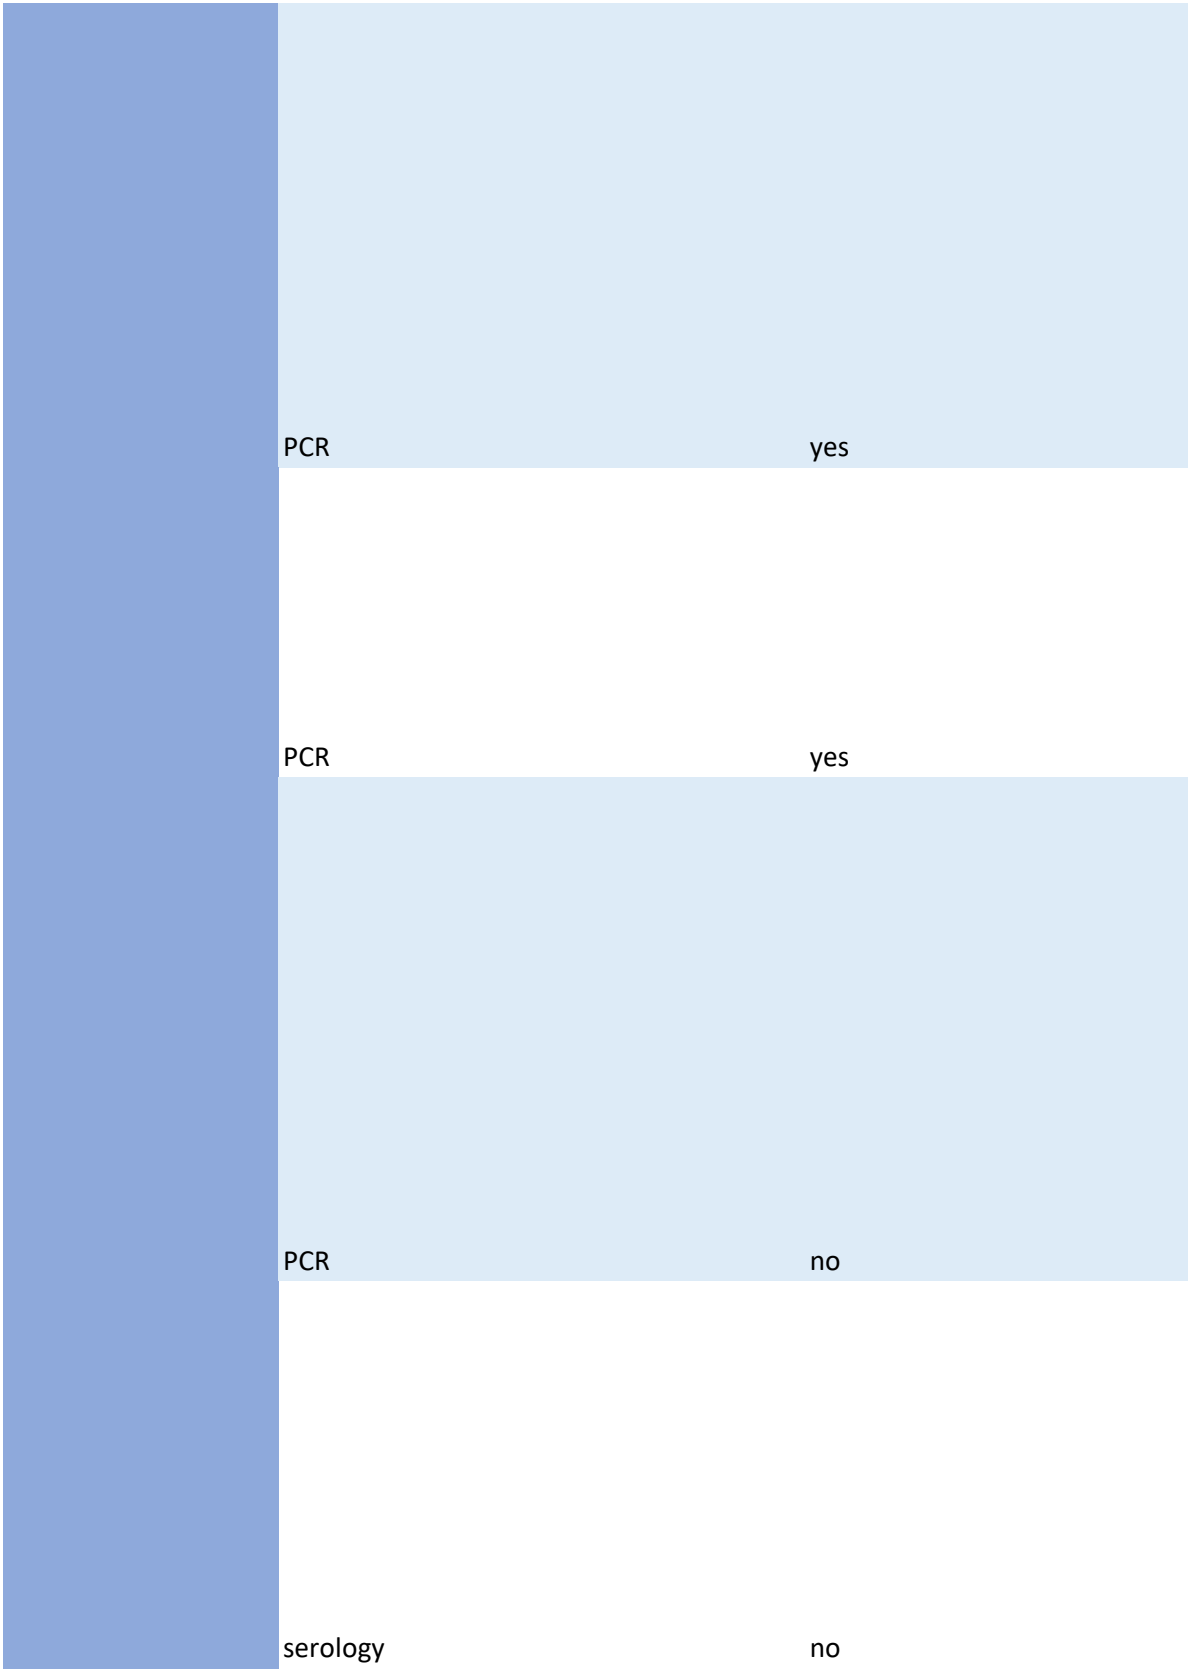

COVID in history

no

COVID in history

no

COVID in history

no

PCR yes

PCR yes

PCR negativ on admission, IgG positive no

PCR testing for SARS-CoV-2 RNA was initiated on the histological specimens of the heart. yes

PCR yes

PCR yes

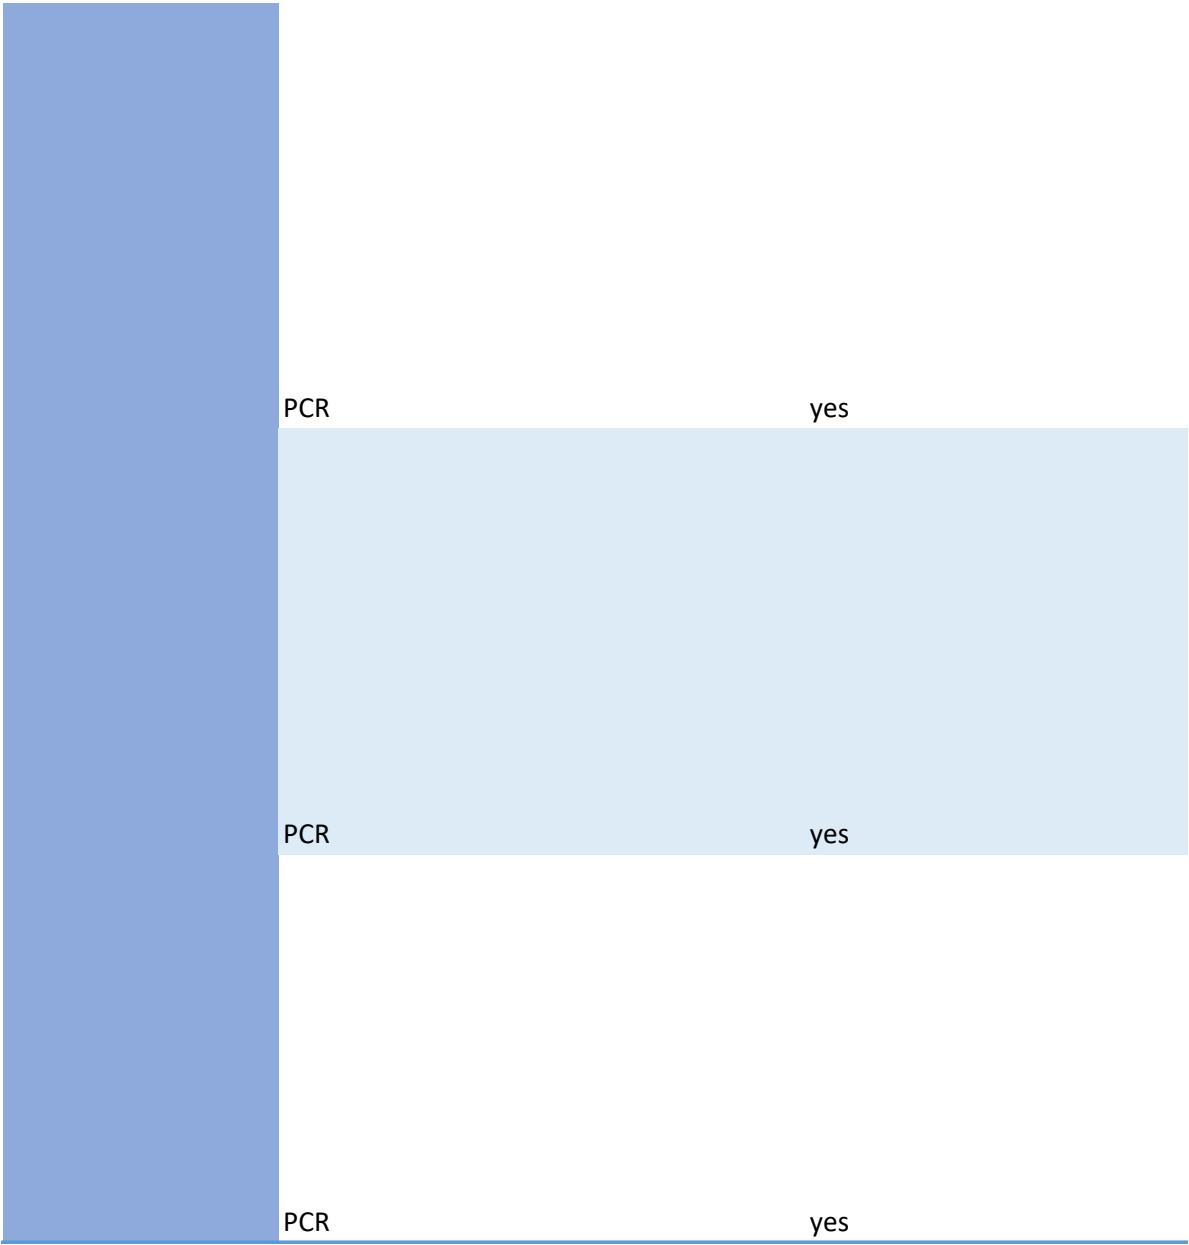

| myocarditis post covid<br>(how long) | Inflammatory markers<br>(CRP, WBC, IL-6,<br>Procalcitonin)                                                                                                                                                                               | Cardiac markers<br>(troponin, NT-<br>proBNP, Ddimer) |                                      |                                      |
|--------------------------------------|------------------------------------------------------------------------------------------------------------------------------------------------------------------------------------------------------------------------------------------|------------------------------------------------------|--------------------------------------|--------------------------------------|
|                                      |                                                                                                                                                                                                                                          |                                                      | troponin                             | NT-proBNP                            |
|                                      | 14.9 × 10 <sup>9</sup> per L                                                                                                                                                                                                             |                                                      | 9002ng/L<br>(normal < 40)            |                                      |
|                                      | CRP 13.8 mg/L -><br>64.23mg/L, WBC -<br>normal ->14.6g/L                                                                                                                                                                                 |                                                      | 18.8 ng/L -<br>>63,5ng/L             | normal -><br>1178pg/mL               |
|                                      | NR                                                                                                                                                                                                                                       |                                                      | 1.26 ng/mL<br>(normal<br><0.3ng/mL)  | 1929 pg/mL<br>(normal <125<br>pg/mL) |
|                                      | CRP 18.6 mg/L                                                                                                                                                                                                                            |                                                      | 135-107-106<br>ng/L (normal <<br>14) | 512 pg/mL<br>(normal < 153)          |
| 4 weeks                              | ferritin 4560ug/L<br>(normal < 300),<br>procalcitonin 155 ug/L<br>(normal <0.5), type 1<br>interferon 6.1 (normal<br><1.7), neutrophil count<br>24 x 10 <sup>9</sup> /L (normal<br><8), lymphopenia 0.5 x<br>10 <sup>9</sup> (normal >1) |                                                      | 4200 ng/L<br>(normal <79)            | 17377 (normal<br><500)               |

|            |                                                                                                         |  |                                           |                                           |
|------------|---------------------------------------------------------------------------------------------------------|--|-------------------------------------------|-------------------------------------------|
| 5 weeks    | WBC 18.600/uL<br>(neutrophils 94.8%), IL-6 533.3 pg/mL (normal <= 4.0 pg/mL), CRP 57.5 mg/dL (elevated) |  | 31.516pg/ml<br>(normal <= 30pg/mL)        | NR                                        |
| 6 months   | NR                                                                                                      |  | NR                                        | NR                                        |
| 5,5 months | NR                                                                                                      |  | 55 ng/l                                   | 212 pmol/l<br>(elevated)                  |
|            | CRP 1.3 mg/dL<br>(Reference range <0.5 mg/dL)                                                           |  | 0.24ng/ml<br>(Reference range <0.01ng/ml) | 5647 pg/mL<br>(Reference range <300pg/mL) |
|            | NR                                                                                                      |  | > 10000 ng/L<br>(elevated)                | 21025 ng/L<br>(elevated)                  |
|            | NR                                                                                                      |  | 11.37 g/L<br>(elevated)                   | 22.600 pg/mL<br>(elevated)                |

|                        |                                                                                                                                                                   |           |                                           |
|------------------------|-------------------------------------------------------------------------------------------------------------------------------------------------------------------|-----------|-------------------------------------------|
| 4 weeks (asymptomatic) | CRP 283mg/L, ferritin 630ug/L                                                                                                                                     | 11810ng/L | NR                                        |
| 5 weeks (asymptomatic) | CRP 315mg/L                                                                                                                                                       | 1557ng/L  | NR                                        |
|                        | CRP 185mg/L, ferritin 824ug/L                                                                                                                                     | 27000ng/L | NR                                        |
|                        | WBC 18000/μl (Reference Range 4500–11,000), CRP 50 mg/L (Reference Range 0.8– 1mg/L), PCT 2 ng/ml (Reference Range < .05), IL-6 24pg/ml (Reference Range < 6)     | 3xUNL     | 21.000 pg/ml (Reference Range <125 pg/ml) |
|                        | WBC 12400/μl (Reference Range 4500–11,000), CRP 65 mg/L. (Reference Range 0.8– 1mg/L), PCT 0,2 ng/ml (Reference Range < .05), IL-6 24 pg/ml (Reference Range < 6) | 2xUNL     | 10.000 pg/ml (Reference Range <125 pg/ml) |

|                                                                                                                                                                           |       |                                              |
|---------------------------------------------------------------------------------------------------------------------------------------------------------------------------|-------|----------------------------------------------|
| WBC 1300/ $\mu$ l<br>(Reference Range 4500–11,000), CRP 45 mg/L (Reference Range 0.8– 1mg/L), PCT 0,2 ng/ml (Reference Range < .05), IL-6 20 pg/ml (Reference Range < 6)  | 4xUNL | 3.000 pg/ml<br>(Reference Range <125 pg/ml)  |
| WBC 10700/ $\mu$ l<br>(Reference Range 4500–11,000), CRP 55mg/L (Reference Range 0.8– 1mg/L), PCT 2 ng/ml (Reference Range < .05), IL-6 24 pg/ml (Reference Range < 6)    | 3xUNL | 21.000 pg/ml<br>(Reference Range <125 pg/ml) |
| WBC 11000/ $\mu$ l<br>(Reference Range 4500–11,000), CRP 30 mg/L (Reference Range 0.8– 1mg/L), PCT 0,8 ng/ml (Reference Range < .05), IL-6 12 pg/ml (Reference Range < 6) | 2xUNL | 4.300 pg/ml<br>(Reference Range <125 pg/ml)  |
| WBC 2400/ $\mu$ l<br>(Reference Range 4500–11,000), CRP 3.5 mg/L (Reference Range 0.8– 1mg/L), PCT 0,2 ng/ml (Reference Range < .05), IL-6 10 pg/ml (Reference Range < 6) | 2xUNL | 1.200 pg/ml<br>(Reference Range <125 pg/ml)  |
| WBC 1800/ $\mu$ l<br>(Reference Range 4500–11,000), CRP 70 mg/L (Reference Range 0.8– 1mg/L), PCT 2,2 ng/ml (Reference Range < .05), IL-6 24 pg/ml (Reference Range < 6)  | 3xUNL | 22.000 pg/ml<br>(Reference Range <125 pg/ml) |

|                                                                                                                                                                                                |                                             |                                                            |
|------------------------------------------------------------------------------------------------------------------------------------------------------------------------------------------------|---------------------------------------------|------------------------------------------------------------|
| WBC 12000/ $\mu$ l<br>(Reference Range<br>4500–11,000), CRP<br>103mg/L (Reference<br>Range 0.8– 1mg/L), PCT<br><0,1 ng/ml (Reference<br>Range < .05), IL-6 8<br>pg/ml (Reference Range<br>< 6) |                                             | 23.000 pg/ml<br>(Reference<br>Range <125<br>pg/ml)         |
|                                                                                                                                                                                                | 2xUNL                                       |                                                            |
| CRP 282 mg/l (elevated)                                                                                                                                                                        | 507 ng/l<br>(elevated)                      | >70,000 ng/l<br>(elevated)                                 |
| CRP 529 mg/L<br>elevated, WBC 15.4<br>(elevated),                                                                                                                                              | 2.6 ng/L (normal) NR                        |                                                            |
| WBC ( $\times 10^3$ ) 17.9<br>(3.8–10.5), CRPmg/dL<br>29.35 (<0.40), Ferritin<br>ng/mL 6379 (15–150),                                                                                          | 582 ng/L (<6 –<br>14)                       | 15642pg/mL (0-<br>300)                                     |
| CRP 1.685 mg/dL<br>(normal range $\leq 0.180$<br>mg/dL), WBC 7100<br>(normal range 4000-<br>8000/ $\mu$ L)                                                                                     | 1.010 ng/mL,<br>norm: $\leq 0.014$<br>ng/mL | NT-proBNP<br>27541.0 pg/mL,<br>norm: $\leq 125.0$<br>pg/mL |

|         |                              |                                                            |                          |
|---------|------------------------------|------------------------------------------------------------|--------------------------|
| 35 days | WBC 25.1 k/IL, CRP >375 mg/L | 2.83 ng/mL (normal <0.04 ng/mL), with a peak of 13.6 ng/mL | 60,230 pg/mL             |
|         | CRP 1.6                      | 118 ng/L (norm: <14 ng/L)                                  | 6,543 (norm: <125)       |
| 40 days | NR                           | 149.87 (norm: 24 - 30 pg/mL)                               | 70.89 (norm: <125 pg/mL) |
|         | WBC 14.9 (elevated)          | 5891 ng/L (elevated)                                       | 16569 ng/L (elevated)    |

|         |                                                                                      |  |                           |                             |
|---------|--------------------------------------------------------------------------------------|--|---------------------------|-----------------------------|
|         | WBC, $15.59 \times 10^3/\mu\text{L}$<br>(4.0 - 10.8 ) , CRP 401<br>mg/L (0.7 - 1.2 ) |  | 1033 ng/ml (< 14<br>ng/L) | 47650 ng/ml (<<br>300 )     |
| 5 weeks | CRP 60 mg/L (elevated),<br>ferritin 6200 $\mu\text{g/L}$                             |  | 1600 pg/ml (<14<br>pg/mL) | 10500 pg/ml<br>(<300 pg/mL) |

|            |                                                                                                                                                                                               |                                                    |                                |
|------------|-----------------------------------------------------------------------------------------------------------------------------------------------------------------------------------------------|----------------------------------------------------|--------------------------------|
| no/3 weeks | 1. WBC 19.4 (4.0-10.0×10 <sup>3</sup> /uL) , CRP 340 (<5 mg/L), Procalcitonin >100 (<0.5 ng/mL) , IL-6 678 (<7 pg/mL), Ferritin 11719 (38-270 ug/L)/ 2. WBC 15,2 (elevated), CRP 3mg/L (N <5) | 1. 256 ng/ml (<15 ng/L)/ 2. 1264 ng/L (normal <15) | NR                             |
|            | WBC 4.98 (4–11 (10 <sup>9</sup> cells/L), CRP 58mg/L (0–4), Ferritin 172mg/L (15–300),                                                                                                        | 77 ng/L (0-14)                                     | NR                             |
| no         | WBC 14 460/mm <sup>3</sup> (elevated); C-reactive protein, 329 mg/L (elevated)                                                                                                                | 8066 pg/mL (elevated)                              | NR                             |
|            | WBC 19000x 10 <sup>3</sup> /uL (4.5–11.3 x 10 <sup>3</sup> /uL), CRP 25.7 (0–5 mg/mL)                                                                                                         | 1190 ng/ml (<14 ng/L)                              | BNP - 13000 pg/ml (<100 pg/mL) |

|                                                                                                                              |  |                                                |                                     |
|------------------------------------------------------------------------------------------------------------------------------|--|------------------------------------------------|-------------------------------------|
| CRP 104.97 mg/L (elevated),<br>procalcitonin 1.95 ng/ml (elevated),<br>ferritin 1492 ng/ml (elevated)                        |  | 0.017 ng/ml (elevated)                         | proBNP 1220 pg/ml (elevated)        |
| WBC 9.8 K/ $\mu$ L, CRp 4.1<br>procalcitonin 1.4 - increased                                                                 |  | troponin I 1.3 ng/mL - increased               | BNP 790 pg/ml - increased           |
| leucocytosis of $22.9 \times 10^9/L$ (neutrophils 92%,<br>lymphocytes 3.1%)<br>ferritin (3188 ng/mL, N < 400), CRP 33 mg/dl) |  | troponin I raised to 3800 ng/mL [N < 13 ng/mL] | (pro-BNP) to 27,696 pg/mL (N < 125) |

|                         |                                                                                                                                                                |                                                                      |                                              |                                 |
|-------------------------|----------------------------------------------------------------------------------------------------------------------------------------------------------------|----------------------------------------------------------------------|----------------------------------------------|---------------------------------|
| yes (time not reported) | WBC 29 x 103/uL<br>(reference range: 4.5-11 x 103/uL), CRP 2.47 mg/dL (reference range: 0.0-0.74 mg/dL), ferritin of 119 ng/mL (reference range: 11-307 ng/mL) |                                                                      | 0.04 ng/mL<br>(reference range: <0.04 ng/mL) | NR                              |
| aprox 30 days           | WBC 13/8.61 x10 <sup>9</sup> /L (3.5 x10 <sup>9</sup> /L – 10 x10 <sup>9</sup> /L) CRP 1370/200 mg/L (< 50mg/L),                                               | elevated serum levels of natriuretic peptides and cardiac troponin I | 0.372/ 0.057 ng/mL (< 0.024ng/mL)            | BNP - 109/258 ng/L, (< 100ng/L) |
| 2 months                | CRP; 105.9 mg/l, reference range <5 mg/l<br>IL-6; 128 pg/ml, reference range <7 pg/ml<br>PCT; 0.12 ng/ml, reference range < 0.05 ng/ml                         |                                                                      | 341 ng/L, ref <14                            | NR                              |

|         |                                                                                                                                                                       |  |                                                           |                         |
|---------|-----------------------------------------------------------------------------------------------------------------------------------------------------------------------|--|-----------------------------------------------------------|-------------------------|
|         | CRP 0.0812 g/L<br>(0.005 g/L)<br>WBC $6.74 \times 10^9$ per L                                                                                                         |  | (NT-proBNP)<br>level was<br>0.572 ng/mL<br>(<0.045 ng/mL) | 127 ng/L<br>(<125 ng/L) |
| 3 weeks | WBC $4.80 \times 10^9$ /l<br>(normal 3.92–10.4)<br>CRP 5 mg/l (normal < 10<br>mg/l) ferritin 267 µg/l<br>(normal 30–400 ug/l)                                         |  | 319 ng/l (normal<br>< 14 ng/l)                            | NT-proBNP of 143        |
| no      | NR                                                                                                                                                                    |  | 2885<br>ng/L (increased)                                  | NR                      |
| no      | WBC 4.7<br>( $\times 10^9$ /l) (4.2–11)<br>CRP 8.1(mg/dl) (<1.0)<br>PCT 0.18 (ng/ml)<br><0.10 Ferritin (ng/ml) 2<br>106 (26–388) Interleukin-<br>6 (pg/ml) 18 (0–5) 2 |  | 0.02–7.33<br>(ng/mL) (<0.05)                              | 859 (pg/ml)<br>(<126)   |
| no      | WBC $14.17 \times 10^9$ /L<br>elevated, CRP 10 mg/L<br>elevated,                                                                                                      |  | T 220–1100<br>ng/dL (elevated)                            | 4421 ng/L<br>(elevated) |

|    |                                                                                                      |  |                                                  |                                        |
|----|------------------------------------------------------------------------------------------------------|--|--------------------------------------------------|----------------------------------------|
| no | 1.7 mg/dL, nv 0.00–0.50 mg/dL                                                                        |  | 0.077 mcg/L, nv < 0.014 mcg/L                    | NR                                     |
|    | WBC normal, CRP 3.3 mg/L - normal                                                                    |  | T <0.03 ng/mL - normal                           | NR                                     |
|    | neutrophil-to-lymphocyte ratio higher than 3<br>CRP 1.2 mg/l (reference range <6 mg/l)<br>PCT normal |  | troponin T<br>72 ng/l (reference range <14 ng/l) | 2451 ng/l (reference range <125 ng/l)  |
| no | CRP 163 (<6) mg/L                                                                                    |  | 103 (0–0.3) ng/ml                                | NR                                     |
| no | CRP 7 mg/L (normal range: 0–5 mg/L)                                                                  |  | T 25 ng/L (normal range: 0–14 ng/L)              | 3428 pg/mL (normal range: 0–400 pg/mL) |

|                 |                                                                                                                                                                     |                               |                                 |
|-----------------|---------------------------------------------------------------------------------------------------------------------------------------------------------------------|-------------------------------|---------------------------------|
|                 | white lymphopenia at 850/mm <sup>3</sup> blood cells at 14.000/ $\mu$ l, C-reactive protein at 120 mg/l (normal between 0.00 and 5.00 mg/, ferritin at 500 $\mu$ g/ | 20000 ng/L (normal < 20 ng/L) | NR                              |
|                 | CRP 230 mg/L (0-5mg/L), procalcitonin 2.1 $\mu$ g/L (0-0.10 $\mu$ g/L), WBC 7.1x10 <sup>9</sup> /L (3.5-11.0x10 <sup>9</sup> /L)                                    | TnT 90 ng/L (0-15 ng/L)       | 160 ng/L (0-85 ng/L)            |
|                 | CRP 24.74 mg/dL (elevated), WBC 14,100 / $\mu$ L                                                                                                                    | 0.094 ng/mL                   | NTproBNP 4,938 pg/mL (elevated) |
| 2 months before | CRP 381 381 mg/dL (elevated), ESR >120 mm/h (elevated),                                                                                                             | hs-TnT 151 ng/L (elevated)    | 25,386 pg/mL (elevated)         |

|               |                                                                                                                                                                             |                                   |                                          |
|---------------|-----------------------------------------------------------------------------------------------------------------------------------------------------------------------------|-----------------------------------|------------------------------------------|
| 5 weeks later | leukocytosis with lymphopenia (WBC 14 G/l; lymphocytes 0.6 G/l), (CRP 281 mg/l - elevated, procalcitonin 0.9 ng/ml- elevated, ESR 62 mm/h), ferritin (3400 ng/ml)- elevated | 0.119 ng/ml (normal < 0.03 ng/ml) | (BNP) was 965 pg/ml (< 73 pg/ml)         |
| 1 month       | ESR 25, CRP 3.2 - elevated                                                                                                                                                  | 11,67 - elevated                  | NR                                       |
| 1 week        | CRP 35.1 mg/L (reference range, 0-8.2 mg/L), ferritin of 394 ng/mL (reference range, 20-300 ng/mL)                                                                          | 1.0 ng/ml                         | 2,336 pg/mL(reference range, 0-99 pg/mL) |

|         |                                                                                                        |                              |                           |
|---------|--------------------------------------------------------------------------------------------------------|------------------------------|---------------------------|
| -       | CRP 193 mg/L (0-5 mg/L), WBC 7.8 (4-103 u/L), PCT 1.38 ng/ml (<0.5 ng/mL)                              | 9 ng/L (3-10 ng/L)           | 430pg/mL (<125 pg/mL)     |
| -       | CRP 11.85 mg/L, WBC 19.290 /μL - elevated, PCT 8.16 ng/ml, ferritin 66,165 ng/ml, OB 46 - all elevated | 544 ng/L                     | NR                        |
| 4 weeks | CRP 604 mg/L, WBC 25, fibrinogen 12.5 g/L, PCT 14 μg/L, IL-6 75.6 μg/L (N < 7) (all elevated)          | 485 ng/L (N < 34) (elevated) | 2960 ng/L                 |
| no      | CRP 13.0 mg/dL (0-0.5 mg/dL) Ferritin 468 ng/mL(30-400 ng/mL), Leucocytes 13.8/nL (3.5-10.0/nL)        | 3264 pg/ml (0-14 pg/mL)      | 12232 pg/mL (1-300 pg/mL) |
| no      | CRP (mg/L) 247.1 (<5.0) WBC (×10 <sup>3</sup> /μL) 10.6 (3.9-10.6) Ferritin 1200μg/L (<322)            | 14 932 ng/L (< 45 ng/L)      | 9223 pg/mL (< 125 pg/mL)  |
| no      | NR                                                                                                     | 0.29 ng/mL (elevated)        | 1,287 pg/mL (elevated)    |

|                                                                                                                                                       |                                                              |                          |
|-------------------------------------------------------------------------------------------------------------------------------------------------------|--------------------------------------------------------------|--------------------------|
| CRP 3.3 mg/dL<br>(elevated)                                                                                                                           | 5.97 ng/mL<br>(elevated)                                     | 379 pg/mL                |
| CRP 14mg/L (<10mg/L),<br>leukocyte count 4.03 x<br>10 <sup>3</sup> /uL, neutrophils<br>83% (<70%),<br>lymphocytes 0.42 x<br>10 <sup>3</sup> /uL 10.4% | troponin T curve<br>29-24-24-18-15<br>ng/L (normal < 14ng/L) | 456 pg/mL<br>(<125pg/mL) |
| WBC 23080 /mm <sup>3</sup> ,<br>neutrophils 91.4%,<br>lymphocytes 1.4%, CRP<br>52,7 mg/L                                                              | 4332 ng/L<br>(elevated)                                      | NR                       |

| D-dimer | Other findings/markers | Chest X-ray findings                                                         | ECG                                                                                      |
|---------|------------------------|------------------------------------------------------------------------------|------------------------------------------------------------------------------------------|
|         |                        |                                                                              | LVH, diffuse inverted T waves                                                            |
|         |                        | normal                                                                       | normal                                                                                   |
|         |                        | multifocal consolidation on both lung fields and cardiomegaly                | non-specific intraventricular conduction delay, multiple premature ventricular complexes |
|         |                        |                                                                              | low atrial ectopic rhythm, mild ST-segment elevation in leads V1-V2 and aVR,             |
|         |                        | subtle bilateral opacities suggesting interstitial inflammatory lung disease | reciprocal ST depression in V4-V6, QTc 452ms with diffuse U-waves                        |
| NR      |                        |                                                                              |                                                                                          |

|    |                                                                                                                                                                                               |                                      |                                                                                                                                    |
|----|-----------------------------------------------------------------------------------------------------------------------------------------------------------------------------------------------|--------------------------------------|------------------------------------------------------------------------------------------------------------------------------------|
| NR | BNP: 3905 pg/mL<br>(normal <= 18.4pg/mL), CK: 2254 U/L (normal 59-248), PCR SARS-Cov-2 negative, SARS-CoV-2 spike and nucleocapsid protein transcripts detected by RT-PCR (myocardial biopsy) |                                      | sinus tachycardia with a ventricular rate of 160, ST elevation in any lead                                                         |
| NR | restrictive respiratory d                                                                                                                                                                     | NR                                   | NR                                                                                                                                 |
| NR | PCR on plasma and heart biopsy tested negative for SARS-CoV-2 RNA by RT-PCR                                                                                                                   | NR                                   | NR                                                                                                                                 |
|    | CK-MB 20.3 ng/mL (Reference range <4.9 ng/mL)                                                                                                                                                 |                                      | low voltage in the limb leads, minimal diffuse ST-segment elevation, ST-segment depression and T-wave inversion in lead V1 and aVR |
| NR | NR                                                                                                                                                                                            | significant enlargement of the heart | III, aVF ST-segment elevation                                                                                                      |
|    |                                                                                                                                                                                               |                                      | sinus tachycardia and no ST-segment elevation                                                                                      |

|          |        |                              |
|----------|--------|------------------------------|
| >4mcg/mL | normal | diffuse ST-segment elevation |
| >4mcg/mL | normal | sinus tachycardia            |

|                                      |    |                                                                                                                                                          |
|--------------------------------------|----|----------------------------------------------------------------------------------------------------------------------------------------------------------|
| 3.5mcg/ML                            | NR | sinus tachycardia                                                                                                                                        |
| 1200 ng/ml<br>(Reference Range <250) | -  | sinus tachycardia, low voltage QRS                                                                                                                       |
| 2400ng/ml<br>(Reference Range <250)  |    | sinus tachycardia, low voltage limb leads, inverted T waves in two limb leads (L1 and aVL), and ST-segment depression in three pericardial leads (V1–V3) |

|                                        |   |    |                                         |
|----------------------------------------|---|----|-----------------------------------------|
| 1500ng/ml<br>(Reference<br>Range <250) | - | NR | ventricular<br>tachycardia -<br>150/min |
|----------------------------------------|---|----|-----------------------------------------|

|                                        |   |    |                                                                                                                                             |
|----------------------------------------|---|----|---------------------------------------------------------------------------------------------------------------------------------------------|
| 3500ng/ml<br>(Reference<br>Range <250) | - | NR | sinus<br>tachycardia                                                                                                                        |
| 1400ng/ml<br>(Reference<br>Range <250) | - | NR | sinus<br>tachycardia, no<br>significant<br>changes in the<br>ST-segment,<br>low-voltage<br>waves in the<br>limb leads, and<br>QRS alternans |

|                                        |   |    |                                                                                           |
|----------------------------------------|---|----|-------------------------------------------------------------------------------------------|
| 1700ng/ml<br>(Reference<br>Range <250) | - | NR | sinus rhythm<br>with ST-<br>segment<br>elevation and<br>Q waves in<br>precordial<br>leads |
| 2400ng/ml<br>(Reference<br>Range <250) | - | NR | torsade de<br>pointes                                                                     |

|                                        |                                        |    |                                                                          |
|----------------------------------------|----------------------------------------|----|--------------------------------------------------------------------------|
| 1350ng/ml<br>(Reference<br>Range <250) | -                                      | NR | sinus<br>tachycardia                                                     |
| NR                                     | thrombocytopenia 140<br>G/L, aPTT 39 s |    | ST-segment<br>depression in<br>all the leads<br>and elevations<br>in aVR |

|                     |   |                                  |                                                                                                                                                 |
|---------------------|---|----------------------------------|-------------------------------------------------------------------------------------------------------------------------------------------------|
| NR                  | - | left upper lobe<br>opacification | on day 7 - type<br>2 AV block<br>(Mobitz type<br>II), then<br>complete heart<br>block (Type 3)<br>with junctional<br>escape rhythm<br>at 35/min |
| 458 ng/mL<br>(<230) | - | severe bilateral<br>opacities    | diffuse new ST-<br>segment<br>elevation, with<br>QTc interval<br>measured at<br>437 ms                                                          |

|                                          |    |    |    |
|------------------------------------------|----|----|----|
| 3.8 µg/mL,<br>normal range<br><1.0 µg/mL | NR | NR | NR |
|------------------------------------------|----|----|----|

|                          |                                                                                                                                                                                                          |              |                                                                                                             |
|--------------------------|----------------------------------------------------------------------------------------------------------------------------------------------------------------------------------------------------------|--------------|-------------------------------------------------------------------------------------------------------------|
| -                        | -                                                                                                                                                                                                        | unremarkable | sinus tachycardia (133/min) with ST elevation in V1 to V3                                                   |
| >10 (norm: <0.25)        | Digital subtraction angiography (DSA) of the left leg demonstrated severe vasospasm of the anterior and posterior tibial arteries but patent flow into the foot requiring four-compartment fasciotomies. | normal       | normal sinus rhythm (102/min) without ST changes                                                            |
| 200 (norm: 0 - 230 ng/m) | NR                                                                                                                                                                                                       | normal       | ventricular tachycardia - 200/min                                                                           |
| NR                       | NR                                                                                                                                                                                                       | NR           | sinus tachycardia at 110 and a diffuse ST-segment elevation (more marked in the lateral and inferior leads) |

|    |    |                                                                                                                                  |    |
|----|----|----------------------------------------------------------------------------------------------------------------------------------|----|
| NR | NR | Bilateral<br>interstitial<br>pneumonia with<br>thickening and<br>interstitial<br>infiltrates<br>suggestive of viral<br>pneumonia | NR |
|----|----|----------------------------------------------------------------------------------------------------------------------------------|----|

serum creatinine 130  
μmol/L, a 10-fold  
increase in serum  
transaminases level

an inferior and  
lateral QS  
aspect, with an  
incomplete  
right bundle  
branch block

|                                        |                                                                                                                                                                                                                         |                                                                                                                                                                                                                                          |                                                                                                                                                                                                                                         |
|----------------------------------------|-------------------------------------------------------------------------------------------------------------------------------------------------------------------------------------------------------------------------|------------------------------------------------------------------------------------------------------------------------------------------------------------------------------------------------------------------------------------------|-----------------------------------------------------------------------------------------------------------------------------------------------------------------------------------------------------------------------------------------|
| 1. 16.44mg/L<br>(<0.44 mg/L)/ 2.<br>NR | AKI creatinine 344/ NR                                                                                                                                                                                                  | bilateral<br>congestive<br>changes and<br>infiltrates in the<br>left lower zone/<br>bilateral infiltrates<br>which were less<br>prominent<br>compared to his<br>previous X-rays<br>when he was<br>admitted with<br>COVID-19<br>pneumonia | sinus<br>tachycardia at<br>a rate of 150<br>/min sinus<br>rhythm with<br>diffuse concave<br>ST-segment<br>elevation in<br>multiple leads.<br>PR depression<br>was also noted<br>in inferolateral<br>leads and PR<br>elevation in<br>aVR |
|                                        |                                                                                                                                                                                                                         |                                                                                                                                                                                                                                          |                                                                                                                                                                                                                                         |
| NR                                     | CK 6432 U/L (normal<br>value 25–200 U/L                                                                                                                                                                                 | normal                                                                                                                                                                                                                                   | poor R-wave<br>progression<br>anteriorly and<br>small QRS<br>complexes                                                                                                                                                                  |
| NR                                     | Arterial blood gas<br>analysis showed<br>compensated<br>metabolic acidosis<br>with<br>hyperlactacidemia (pH,<br>7.51; excess basis, 9<br>mEq/L; lactates, 3<br>mmol/L) and<br>normoxemia. CK-MB<br>2103 UI/L (elevated) | NR                                                                                                                                                                                                                                       | NR                                                                                                                                                                                                                                      |
|                                        |                                                                                                                                                                                                                         |                                                                                                                                                                                                                                          |                                                                                                                                                                                                                                         |
| NR                                     | NR                                                                                                                                                                                                                      | reticular<br>interstitial<br>opacities                                                                                                                                                                                                   | diffuse and<br>concave<br>elevation of<br>the ST-<br>segment, with<br>PR segment<br>depression and<br>Spodick's sign                                                                                                                    |

|                      |                                                                                                                                                                            |                                |                                                           |
|----------------------|----------------------------------------------------------------------------------------------------------------------------------------------------------------------------|--------------------------------|-----------------------------------------------------------|
|                      | Arterial blood gas analysis showed a pH of 7.49, carbon dioxide partial pressure of 27.9 mm Hg, oxygen partial pressure 93.3 mm Hg, bicarbonate level of 24.4 mm Hg, and a |                                | sinus tachycardia, left ventricular hypertrophy, biatrial |
| 313 ng/ml (elevated) | lactate level of 1.8 mmol/L.                                                                                                                                               | bilateral multifocal opacities | enlargement, and QTc 449ms                                |

|                        |                                                                                                                                         |                                       |                                           |
|------------------------|-----------------------------------------------------------------------------------------------------------------------------------------|---------------------------------------|-------------------------------------------|
| 1961 ng/ml - increased | creatinine 2.0 mg/dL - increased                                                                                                        | multifocal bilateral airspace disease | rapid atrial fibrillation and low voltage |
| (2132 ng/mL, N < 580)  | lactate dehydrogenase (552 U/L, N < 225), transaminases (ALT 103 U/L [N < 41], AST 88 U/L [N < 38]), prothrombin time (1.33, [N < 1.2]) | normal                                | normal                                    |

|    |                                                                                                                                                                                                                                                                                                                                        |                                       |                                                                                                                                                                                                                                                                                                                             |
|----|----------------------------------------------------------------------------------------------------------------------------------------------------------------------------------------------------------------------------------------------------------------------------------------------------------------------------------------|---------------------------------------|-----------------------------------------------------------------------------------------------------------------------------------------------------------------------------------------------------------------------------------------------------------------------------------------------------------------------------|
|    | creatinine of 4.4 mg/dL (reference range: 0.44-1.00 mg/dL), glucose 1679 mg/dl, anion gap of 46 mmol/L (reference range: 5-13 mmol/L), carbon dioxide of 6 mmol/L (reference range: 24-31 mmol/L) , potassium of 2.9 mmol/L (reference range: 3.5-5.2 mmol/L), lactic acid level of 17.1 mg/dL, lactate dehydrogenase (LDH) of 296 U/L | findings were suspicious for COVID-19 | wide complex tachycardia with a heart rate of 119/min and accelerated junctional rhythm, significant for ST-segment depression in the lateral leads and ST elevation in leads I and aVL, showing sinus tachycardia at 119/min with low voltage and nonspecific ST changes in the lateral leads, and possible septal infarct |
| NR |                                                                                                                                                                                                                                                                                                                                        |                                       |                                                                                                                                                                                                                                                                                                                             |
| NR |                                                                                                                                                                                                                                                                                                                                        | NR                                    | T-wave inversions in the anterolateral leads                                                                                                                                                                                                                                                                                |
|    | Pulse Contour Cardiac Output measurement confirmed marginal cardiac output of 4.4 l/min                                                                                                                                                                                                                                                | NR                                    | sinus tachycardia                                                                                                                                                                                                                                                                                                           |
| NR |                                                                                                                                                                                                                                                                                                                                        |                                       |                                                                                                                                                                                                                                                                                                                             |

|    |    |                                                    |    |
|----|----|----------------------------------------------------|----|
|    |    |                                                    |    |
| NR | NR | focal consolidation on the upper zone of left lung | NR |

|                      |    |    |                              |
|----------------------|----|----|------------------------------|
| < 0.10 mg/l (0.0- NR |    | NR | T-wave inversion in lead III |
| NR                   | NR | NR | NR                           |

|                       |    |                                                              |                                                                                 |
|-----------------------|----|--------------------------------------------------------------|---------------------------------------------------------------------------------|
| NR                    |    | bibasilar patchy interstitial opacities.                     | sinus tachycardia without ST-T wave changes                                     |
|                       |    |                                                              |                                                                                 |
| 23 242 ng/mL elevated | NR | mild signs of vascular redistribution, with no infiltrations | concave ST-segment elevation and PR-segment depression, as well as low voltages |

diffuse and non-specific repolarization abnormalities, QT interval was within limits (460 ms). Holter monitoring showed frequent ectopic ventricular beats and several sequences of non-sustained ventricular tachycardia

|    |    |    |    |
|----|----|----|----|
| NR | NR | NR |    |
| NR | NR | NR | NR |

1.39 mg/l  
(reference range <0.5 mg/l)

|    |    |    |    |
|----|----|----|----|
|    | NR | NR | NR |
| NR | NR | NR | AF |

cardiomegaly, increased interstitial lung markings and small effusions

|    |    |  |    |
|----|----|--|----|
| NR | NR |  | AF |
|----|----|--|----|

|           |                                                                                                                                                                                                                    |                            |                                                                                                                                                   |
|-----------|--------------------------------------------------------------------------------------------------------------------------------------------------------------------------------------------------------------------|----------------------------|---------------------------------------------------------------------------------------------------------------------------------------------------|
|           |                                                                                                                                                                                                                    |                            | ST segment elevation in V1 and V2 derivations with Q waves of necrosis, an abrasion of R waves in V3 and a negative T wave in inferior territory. |
| 0.40      | NR                                                                                                                                                                                                                 | NR                         |                                                                                                                                                   |
|           | respiratory alkalosis (on room air: pH 7.55; partial pressure of carbon dioxide 3.9 kPa; partial pressure of oxygen 8.4 kPa; bicarbonate 23 mmol/L).                                                               | bibasal consolidations     | moderately flattened T-waves                                                                                                                      |
| NR        |                                                                                                                                                                                                                    |                            |                                                                                                                                                   |
|           | The main laboratory findings included leukocytosis, liver dysfunction, high levels of N-terminal pro-b-type natriuretic peptide (NT-proBNP), high C-reactive protein and electrolyte abnormality, and dyslipidemia | y showed mild cardiomegaly | sinus tachycardia and slight ST segment elevation in leads I, II, aVL, and V2-6                                                                   |
| 1.1 µg/mL | neutrophilia, lymphopenia, thrombocytopenia, multiplex cytokine panel showed very high CXCL9 and CXCL10 levels as well as signs of inflammasome activation                                                         |                            |                                                                                                                                                   |
| NR        |                                                                                                                                                                                                                    | NR                         | sinus tachycardia                                                                                                                                 |

|                         |                                                                                                                                              |    |    |
|-------------------------|----------------------------------------------------------------------------------------------------------------------------------------------|----|----|
|                         |                                                                                                                                              |    |    |
| 4613.46 µg/L - elevated | elevated GGTP (386 U/l), alkaline phosphatase (216 U/l) and bilirubin (7.5 mg/dl) with normal transaminase and lactate dehydrogenase levels. | NR | NR |

|                |    |              |                                                           |
|----------------|----|--------------|-----------------------------------------------------------|
| 514 - elevated | NR | unremarkable | concave shaped ST-elevation in inferior and lateral leads |
|----------------|----|--------------|-----------------------------------------------------------|

|                                            |    |    |                                                                                                                           |
|--------------------------------------------|----|----|---------------------------------------------------------------------------------------------------------------------------|
| 0.51 mg/L (reference range, <0.5 mg/L FEU) | NR | NR | normal sinus rhythm shows T wave inversions in inferior and anterolateral leads with prolonged QTc, diffuse ST-elevations |
|--------------------------------------------|----|----|---------------------------------------------------------------------------------------------------------------------------|

|            |                                                                                                                                                  |                                                  |                                                                                   |
|------------|--------------------------------------------------------------------------------------------------------------------------------------------------|--------------------------------------------------|-----------------------------------------------------------------------------------|
| NR         | cardiac output at 2.5 L/min measured by pulse contour cardiac output PiCCO, central venous pressure of 24 mmHg, central venous saturation of 50% | bilat- eral infiltrates consistent with COVID-19 | wave inversion in the lateral leads                                               |
| 1068 ng/mL | creatinine kinase 2135 U/L, creatine kinase myocardial band 54.3 ng/mL                                                                           | diffuse bilateral patchy opacities               | sinus tachycardia, ST-elevation in leads II, III, aVF and ST-depression in I, aVL |

|                      |    |    |                   |
|----------------------|----|----|-------------------|
| 5700 ng/L (elevated) | NR | NR | sinus tachycardia |
| NR                   | NR | NR | NR                |

|                  |    |                            |                                                                                                       |
|------------------|----|----------------------------|-------------------------------------------------------------------------------------------------------|
| 611 µg/L (0–549) | NR | NR                         | marked QRS widening and a positive deflection at the end of the T wave in the absence of hypokalaemia |
| NR               | NR | bilateral pleural effusion | diffuse ST elevation                                                                                  |

|                      |                                                                                                                                                  |                                                   |                                                                                                                                       |
|----------------------|--------------------------------------------------------------------------------------------------------------------------------------------------|---------------------------------------------------|---------------------------------------------------------------------------------------------------------------------------------------|
|                      | ESR 44mm/hr, LDH 926u/L, procalcitonin 0,04ng/mL (negative), AST 89 u/L and ALT 152 u/L both elevated, CPK 366 u/L, ferritin 243 ng/mL (normal). | NR                                                | 1 to 2mm ST elevations in lead I and aVL, ST depression in aVR, mild J-point elevation, and T-wave inversion in leads II, III and aVF |
| 0.96 mcg/mL          |                                                                                                                                                  |                                                   |                                                                                                                                       |
| 790ng/mL (<500ng/mL) | NR                                                                                                                                               | interstitial pattern with opacities in both lungs | sinus rhythm with minimal ST-segment elevation and extensive repolarization abnormalities                                             |
| NR                   | ABG pH: 7.2, excess basis -6mEq/L, lactates 9mmol/dL and hypoxemia                                                                               | NR                                                | NR                                                                                                                                    |

| CT findings                                        | ECHO findings | PCI        |
|----------------------------------------------------|---------------|------------|
| bilateral ground-glass opacities and condensations | mild LVH      | no disease |

pulmonary ground-glass peripheral normal

a multifocal consolidation and ground- severe LV systolic dysfunction

bilateral patchy ground-glass opacities

mild LV systolic dysfunction (LVEF 43%), with inferolateral wall hypokinesis

NR

LVEF 20%, low cardiac output

normal coronary arteries

|                                                  |                               |                                |
|--------------------------------------------------|-------------------------------|--------------------------------|
| no signs of SARS-CoV-2 infection,<br>atelectasis | severe hypokinesis, LVEF 7.4% | normal<br>coronary<br>arteries |
|--------------------------------------------------|-------------------------------|--------------------------------|

|    |                                                                           |    |
|----|---------------------------------------------------------------------------|----|
| NR | LVEF 39%, global mild hypokinesia and severe<br>inferior wall hypokinesia | NR |
|----|---------------------------------------------------------------------------|----|

|    |                                      |
|----|--------------------------------------|
| NR | biventricular failure and congestion |
|----|--------------------------------------|

|    |                                                                                                                                                                                                                                                                                                     |                                                                          |
|----|-----------------------------------------------------------------------------------------------------------------------------------------------------------------------------------------------------------------------------------------------------------------------------------------------------|--------------------------------------------------------------------------|
| NR | LVEF 40%, increased wall thickness, the diffuse<br>echo-bright appearance of the myocardium,<br>diffuse hypokinesis, LV diastolic function mildly<br>impaired with mitral inflow patterns, E/A ratio<br>of 0.7 and E/e' ratio of 12, pericardial effusion<br>(max 11mm) without signs of tamponade, | no<br>evidence<br>of<br>obstructiv<br>e<br>coronary<br>artery<br>disease |
|----|-----------------------------------------------------------------------------------------------------------------------------------------------------------------------------------------------------------------------------------------------------------------------------------------------------|--------------------------------------------------------------------------|

|                                                             |                                                                                                             |    |
|-------------------------------------------------------------|-------------------------------------------------------------------------------------------------------------|----|
| pulmonary infection, enlarged heart<br>and pleural effusion | LVEF 27%, enlarged heart LVED 58mm, LAVD<br>39mm, RVED 25mm, RAED 48mm, trace (2mm)<br>pericardial effusion | NR |
|-------------------------------------------------------------|-------------------------------------------------------------------------------------------------------------|----|

|    |                                                                                                       |
|----|-------------------------------------------------------------------------------------------------------|
| NR | LVEF 32%, diffuse myocardial dyskinesia,<br>enlarged left ventricle, pulmonary hypertension<br>44mmHg |
|----|-------------------------------------------------------------------------------------------------------|

|    |                                                                                                                                                                                |                          |
|----|--------------------------------------------------------------------------------------------------------------------------------------------------------------------------------|--------------------------|
| NR | large pericardial effusion with severe biventricular dysfunction and left ventricular ejection fraction (LVEF) of 10-15% (cardiac tamponade with concurrent cardiogenic shock) | normal coronary arteries |
|----|--------------------------------------------------------------------------------------------------------------------------------------------------------------------------------|--------------------------|

|    |                                                                                      |    |
|----|--------------------------------------------------------------------------------------|----|
| NR | severe LV systolic dysfunction with LVEF 15-20% and moderate RV systolic dysfunction | NR |
|----|--------------------------------------------------------------------------------------|----|

|    |                                                           |    |
|----|-----------------------------------------------------------|----|
| NR | severe biventricular systolic dysfunction with LVEF 5-10% | NR |
|----|-----------------------------------------------------------|----|

|                                                                   |                                                                                                                                                                                                                                            |    |
|-------------------------------------------------------------------|--------------------------------------------------------------------------------------------------------------------------------------------------------------------------------------------------------------------------------------------|----|
| diffuse bilateral ground-glass opacities and basal consolidations | small LV with an end-diastolic dimension of 42 mm, LVEF 10% with global hypokinesis, a normal right RV, and pulmonary arterial pressure (PAP), no pericardial effusion (PE) or thrombosis, and no significant valve lesions or dysfunction | NR |
|-------------------------------------------------------------------|--------------------------------------------------------------------------------------------------------------------------------------------------------------------------------------------------------------------------------------------|----|

|                                                                 |                                                                                                                                                                                                                        |    |
|-----------------------------------------------------------------|------------------------------------------------------------------------------------------------------------------------------------------------------------------------------------------------------------------------|----|
| diffuse bilateral ground-glass opacities suggestive of COVID-19 | LVEF 25%, an enlarged end-diastolic diameter of the left ventricle, normal RV size (mild dysfunction), and normal valvular and pericardial function. Moreover, echocardiography demonstrated increased wall thickness. | NR |
|-----------------------------------------------------------------|------------------------------------------------------------------------------------------------------------------------------------------------------------------------------------------------------------------------|----|

|                                                                |                                                                                                                             |    |
|----------------------------------------------------------------|-----------------------------------------------------------------------------------------------------------------------------|----|
|                                                                | LVEF 30%, normal LV and RV size, moderate tricuspid and mitral regurgitation, systolic pulmonary artery pressure of 30 mmHg | NR |
| bilateral ground-glass opacities and bilateral pulmonary edema |                                                                                                                             |    |

|                                                                |                                                                                                                                        |    |
|----------------------------------------------------------------|----------------------------------------------------------------------------------------------------------------------------------------|----|
|                                                                | LVEF 30%–35%, LVEDD of 5 cm, moderate RV enlargement and dysfunction, dilated inferior vena cava, and mild left-sided pleural effusion | NR |
| bilateral ground-glass opacities and bilateral pulmonary edema |                                                                                                                                        |    |

|                                                                |                                                                                                                                                                                                          |    |
|----------------------------------------------------------------|----------------------------------------------------------------------------------------------------------------------------------------------------------------------------------------------------------|----|
|                                                                | LVEF of 45%, normal LV size and function without regional wall motion abnormalities, and circumferential pericardial effusion without significant respiratory changes in the mitral and tricuspid valves | NR |
| bilateral ground-glass opacities suggestive of viral pneumonia |                                                                                                                                                                                                          |    |

|                                  |                                                                                                              |                   |
|----------------------------------|--------------------------------------------------------------------------------------------------------------|-------------------|
|                                  | LVEF 30%–35%, hypokinesis in the anterior wall, normal normal LV size as well as normal RV size and function | coronary arteries |
| bilateral ground-glass opacities |                                                                                                              |                   |

|                                  |                                                       |                                                                                           |
|----------------------------------|-------------------------------------------------------|-------------------------------------------------------------------------------------------|
|                                  |                                                       | a non-significant (<50%) lesion in the middle part of the left anterior descending artery |
| bilateral ground-glass opacities | LVEF 35%, normal LV size, increased LV wall thickness |                                                                                           |

|                                                                                   |                                                                                                                                                                            |                                |
|-----------------------------------------------------------------------------------|----------------------------------------------------------------------------------------------------------------------------------------------------------------------------|--------------------------------|
| bilateral ground-glass opacities                                                  | LVEF 30%–35%, mild pericardial effusion, RV enlargement, hypermobile thrombus in the LV (1.5 × 1.5 cm)                                                                     | normal coronary arteries       |
| excluded pulmonary thromboembolism but showed bilateral lower-lobe consolidations | moderately reduced left ventricular function LVEF 30% and normal right ventricular size and function. There was no evidence of left ventricular hypertrophy or dilatation. | non relevant coronary stenosis |

|                                           |                                                                                                                                                                                                                                                |    |
|-------------------------------------------|------------------------------------------------------------------------------------------------------------------------------------------------------------------------------------------------------------------------------------------------|----|
| features of acute calculous cholecystitis | LV systolic impairment with no obvious regional wall motion abnormalities                                                                                                                                                                      | NR |
| NR                                        | significant for severe segmental LV systolic dysfunction, LVEF 15–20% with hypokinesis of the apex, distal anterior septum, and anterior and lateral walls, with a small pericardial effusion. Right ventricular size and function were normal | NR |

|                                                                                             |                                                 |                                        |
|---------------------------------------------------------------------------------------------|-------------------------------------------------|----------------------------------------|
| bilateral mild ground glass appearance, bilateral pleural effusion and pericardial effusion | low LVEF<20% and diffuse myocardial hypertrophy | no obstructive coronary artery disease |
|---------------------------------------------------------------------------------------------|-------------------------------------------------|----------------------------------------|

|    |                                                                  |                                                                |
|----|------------------------------------------------------------------|----------------------------------------------------------------|
| NR | severe global hypokinesis of the left ventricle with LVEF of 25% | Emergent coronary angiogram revealed normal coronary arteries. |
|----|------------------------------------------------------------------|----------------------------------------------------------------|

CT of the chest reported bilateral patchy consolidation and ground glass opacification in the lower lobes. There were no significant findings on CT of the abdomen and brain.

A severely reduced biventricular function, normal cardiac chamber size, and a globally thickened, bright myocardium (measuring 16 mm in the septum and inferolateral wall) with a small-to-moderate-sized pericardial effusion.

-

|    |                                                                                                                   |                                            |
|----|-------------------------------------------------------------------------------------------------------------------|--------------------------------------------|
| NR | dilated LV, mild diffuse hypokinesia with light impairment of global systolic function, and a dilated left atrium | PCI showed no epicardial coronary lesions. |
|----|-------------------------------------------------------------------------------------------------------------------|--------------------------------------------|

|    |                                                                                                                              |                                    |
|----|------------------------------------------------------------------------------------------------------------------------------|------------------------------------|
| NR | 20-mm pericardial effusion compressing the right heart chambers and LV systolic dysfunction LVEF 35% with global hypokinesis | no evidence of significant lesions |
|----|------------------------------------------------------------------------------------------------------------------------------|------------------------------------|

|                                                                                                         |                                                                                                                                                                         |           |
|---------------------------------------------------------------------------------------------------------|-------------------------------------------------------------------------------------------------------------------------------------------------------------------------|-----------|
| <p>The chest computed tomography (CT) ruled out acute pulmonary embolism and revealed cardiomegaly.</p> | <p>enlarged LV (56 mm), diffuse myocardial hypokinesia along with severe left ventricular systolic dysfunction LVEF 15-20% and a decrease in right cardiac function</p> | <p>NR</p> |
|---------------------------------------------------------------------------------------------------------|-------------------------------------------------------------------------------------------------------------------------------------------------------------------------|-----------|

|                                                                                                                                                                                                                                                        |                                                                                                                                                                                                              |                      |
|--------------------------------------------------------------------------------------------------------------------------------------------------------------------------------------------------------------------------------------------------------|--------------------------------------------------------------------------------------------------------------------------------------------------------------------------------------------------------------|----------------------|
| <p>heterogeneous enhancement and thickening of the myocardium, pericardial effusion, bilateral ground glass opacities, posterior consolidations, septal lines, and a moderate right pleural effusion. No evidence of pulmonary embolism was found.</p> | <p>biventricular infiltrative myocardial hypertrophy, associated with a circumferential non-compressive pericardial effusion and a restrictive mitral inflow profile. There was no systolic dysfunction.</p> | <p>not performed</p> |
|--------------------------------------------------------------------------------------------------------------------------------------------------------------------------------------------------------------------------------------------------------|--------------------------------------------------------------------------------------------------------------------------------------------------------------------------------------------------------------|----------------------|

|    |                                                                                                                                                                                                                                                                                                                                                                                                                                                                                                                                                                              |    |
|----|------------------------------------------------------------------------------------------------------------------------------------------------------------------------------------------------------------------------------------------------------------------------------------------------------------------------------------------------------------------------------------------------------------------------------------------------------------------------------------------------------------------------------------------------------------------------------|----|
| NR | normal left ventricle size with severe global hypokinesia and severely reduced LV systolic function LVEF of 24%, and there was mild-to-moderate mitral regurgitation. RV function was also severely reduced, with moderate-to-severe tricuspid regurgitation and mildly increased pulmonary artery pressure (40 mm Hg). There was no pericardial effusion. / Transthoracic echocardiogram showed a normal left ventricular systolic function with an LVEF of 53%. Apex was noted to be akinetic while other segments were moving normally. There was no pericardial effusion | NR |
|----|------------------------------------------------------------------------------------------------------------------------------------------------------------------------------------------------------------------------------------------------------------------------------------------------------------------------------------------------------------------------------------------------------------------------------------------------------------------------------------------------------------------------------------------------------------------------------|----|

small pericardial effusion and non-specific bronchocentric ground-glass opacities in the left lower zone which was reported as being suspicious for COVID-19

a trivial anterior pericardial effusion with good biventricular function

|                                                |                                                                 |                        |
|------------------------------------------------|-----------------------------------------------------------------|------------------------|
| no anomaly in the thoracic and abdominal areas | a non-dilated LV and severe and diffuse LV hypokinesia LVEF 30% | no significant lesions |
|------------------------------------------------|-----------------------------------------------------------------|------------------------|

compromise of the lung parenchyma, and mixed opacities, mainly alveolar and ground-glass of peripheral and basal predominance, a classic pattern of pulmonary involvement in COVID-19

left ventricle with global hypokinesia, with severely reduced systolic function, an ejection fraction of 30%, without valvular heart disease, and mild pericardial effusion (2 mm)

NR

|                                                            |                                                                                                                                                                                                                                                                                                                                                                                                                                                                                                                                                                                                                                                                                                                                                  |                                                                  |
|------------------------------------------------------------|--------------------------------------------------------------------------------------------------------------------------------------------------------------------------------------------------------------------------------------------------------------------------------------------------------------------------------------------------------------------------------------------------------------------------------------------------------------------------------------------------------------------------------------------------------------------------------------------------------------------------------------------------------------------------------------------------------------------------------------------------|------------------------------------------------------------------|
| NR                                                         | <p>estimated left ventricular ejection fraction (LVEF) of 10–15%, reduced right ventricular systolic function, and global dilatation of all 4 chambers [Figure 3]. The right ventricle, right atrium and left atrium were moderately dilated, compared to mild left ventricular dilation. Specific measurements included: left ventricular internal diameter during end diastole (LVIDd) 5.8 cm, left ventricular internal diameter during end systole (LVIDs) of 5.1 cm, interventricular septum thickness (IVS) 1.3 cm and a Pulmonary Artery Systolic Pressure of 18 mm Hg. No significant valvular pathology was identified aside from mild regurgitation of the mitral and tricuspid valves. A pericardial effusion was not visualized.</p> | NR                                                               |
| NR                                                         | <p>extreme concentric left ventricular (LV) hypertrophy (LVH) with a wall thickness of 2.0 cm, reduced biventricular function with LV ejection fraction (EF) of 20%, and a small pericardial effusion</p>                                                                                                                                                                                                                                                                                                                                                                                                                                                                                                                                        | NR                                                               |
| discarded lung infiltrates but showed signs of ileocolitis | <p>biventricular dysfunction, with left ventricular ejection fraction (LVEF) of 30% due to diffuse hypokinesis, diastolic dysfunction and slight posterior pericardial effusion without tamponade signs.</p>                                                                                                                                                                                                                                                                                                                                                                                                                                                                                                                                     | <p>coronary angiography<br/>discarded coronary artery injury</p> |

|    |                                                                                   |                        |
|----|-----------------------------------------------------------------------------------|------------------------|
| NR | left ventricular ejection fraction (LVEF) of 26-30% and mild mitral regurgitation | no significant lesions |
|----|-----------------------------------------------------------------------------------|------------------------|

|    |                                                                                                                                                                                          |    |
|----|------------------------------------------------------------------------------------------------------------------------------------------------------------------------------------------|----|
| NR | echocardiographic signs of left ventricular (LV) dysfunction (decreased global and regional longitudinal strain or reduced LV ejection fraction and increased LV end-diastolic diameter) | no |
|----|------------------------------------------------------------------------------------------------------------------------------------------------------------------------------------------|----|

|                                                                                                                                   |                                                                                                                                               |    |
|-----------------------------------------------------------------------------------------------------------------------------------|-----------------------------------------------------------------------------------------------------------------------------------------------|----|
| enlarged abdominal lymph nodes, wall thickening of the colon and polyserositis with pericardial and pleural effusions and ascites | transthoracic echocardiography revealed a severely impaired left ventricular cardiac function (left ventricular ejection fraction, LVEF, 25%) | no |
|-----------------------------------------------------------------------------------------------------------------------------------|-----------------------------------------------------------------------------------------------------------------------------------------------|----|

subpleural consolidation containing air bronchogram with a halo of ground-glass opacification in the left upper lobe

NR

no

Normal

preserved left ventricular (LV) and right ventricular (RV) contractility and no regional wall motion abnormality or myocardial hypertrophy.

no

Normal

normal systolic function with no pericardial effusion

Extensive diffuse bilateral airspace consolidations and ground-glass opacities most pronounced in the right upper lobe and bilateral lower lobes, with areas of subpleural sparing. Trace bilateral pleural effusions and minimal coronary artery calcification were noted.

moderate diffuse hypokinesis with relative apical sparing and a left ventricular ejection fraction of 35% to 40%

no

NR

disclosed moderate concentric hypertrophy, diminished intraventricular volumes with preserved left ventricular ejection fraction without segmental abnormalities, and moderate pericardial effusion with no clear signs of hemodynamic deterioration

2hours after admission - showed severe biventricular failure and diffuse myocardial edema

no

|                                                                                                                                                                                                                                          |                                                                                    |    |
|------------------------------------------------------------------------------------------------------------------------------------------------------------------------------------------------------------------------------------------|------------------------------------------------------------------------------------|----|
| severe pneumonitis with multiple ground-glass opacities with a confluent appearance mainly at the level of the lower lobes, the lateral segment of the middle lobe and the lower and posterior lingular segments of the right upper lobe | normal size and function of the left ventricle (LV) with mild pericardial effusion | no |
|------------------------------------------------------------------------------------------------------------------------------------------------------------------------------------------------------------------------------------------|------------------------------------------------------------------------------------|----|

|    |                                        |    |
|----|----------------------------------------|----|
| NR | mild left ventricular (LV) dysfunction | no |
|----|----------------------------------------|----|

|    |    |    |
|----|----|----|
| NR | NR | no |
|----|----|----|

|                                                                                                                                                                     |                                                                                                                                                                                                                                                                        |    |
|---------------------------------------------------------------------------------------------------------------------------------------------------------------------|------------------------------------------------------------------------------------------------------------------------------------------------------------------------------------------------------------------------------------------------------------------------|----|
| diffuse bilateral ground-glass opacities suggesting severe COVID-19 and viral pneumonia that scattered across two lungs with mild pleural effusion and cardiomegaly | reduced left ventricular ejection fraction (LVEF = 15%), high pulmonary arterial pressure (PAP = 50 mmHg), mildly enlarged LV and moderate to severe LV dysfunction, mild diastolic dysfunction (grade 1), mild mitral valve regurgitation, and normal septal thicknes | no |
|---------------------------------------------------------------------------------------------------------------------------------------------------------------------|------------------------------------------------------------------------------------------------------------------------------------------------------------------------------------------------------------------------------------------------------------------------|----|

|                                                                                 |                                                                                             |    |
|---------------------------------------------------------------------------------|---------------------------------------------------------------------------------------------|----|
| minor coronary artery calcification with no obstructive coronary artery disease | severely impaired left ventricular ejection fraction (LVEF) of 20% and mitral regurgitation | no |
|---------------------------------------------------------------------------------|---------------------------------------------------------------------------------------------|----|

|                                                                             |                                                                                                                                                                                                   |                             |
|-----------------------------------------------------------------------------|---------------------------------------------------------------------------------------------------------------------------------------------------------------------------------------------------|-----------------------------|
| covid 19 pneumopathy with 50% of lung damage and bilateral pleural effusion | akinesia of the tip of the antero-septal and inferior wall of the left ventricular (LV) with severe hypokinesia of the inferior wall, a systolic dysfunction LV with an ejection fraction of 40%. | Performed, without lesions. |
|-----------------------------------------------------------------------------|---------------------------------------------------------------------------------------------------------------------------------------------------------------------------------------------------|-----------------------------|

A CT of the neck was performed to assess the neck swelling. This showed subcutaneous oedema on the left side with multiple enlarged lymph nodes up to 2.0×2.7 cm in diameter. The CT angiogram showed no coronary artery stenosis.

good ventricular function without hypokinesia and no significant valve pathology at admission. Echocardiography was repeated on day 2 revealing a deterioration of the left ventricular function with reduced systolic function of 40%

NR

|    |                                                                                                                                                                                                                                                                                                 |                          |
|----|-------------------------------------------------------------------------------------------------------------------------------------------------------------------------------------------------------------------------------------------------------------------------------------------------|--------------------------|
| NR | impaired left ventricular (LV) systolic function (ejection fraction [LVEF], 53%, end diastolic and systolic dimensions [LVDD and LVDS]: 42 and 31 mm, respectively) with thickened walls (interventricular septum [IVS], 12 mm; LV posterior wall [LVPW], 12 mm), and mild pericardial effusion | normal coronary arteries |
|----|-------------------------------------------------------------------------------------------------------------------------------------------------------------------------------------------------------------------------------------------------------------------------------------------------|--------------------------|

NR

severely depressed left ventricular function due to moderate to severe hypokinesia

Pulmonary embolism was excluded based on the angio-CT. CT scan of the abdomen and pelvis with contrast revealed no focal changes of oncological concern or other enlarged pathological lymph nodes, but enlarged, homogenous liver without signs of cholestasis and an enlarged spleen.

globally reduced myocardial contractility and decreased ejection fraction up to 40%

NR

left ventricular ejection fraction (LVEF) of 40–45%, mildly decreased globular left ventricular systolic function and moderate to severe hypokinesis involving inferior, inferoposterior wall without thinning of myocardium

no significant lesions

NR

head CT without contrast was negative for ischemia or intracranial haemorrhage

new findings of severely reduced left ventricular (LV) systolic function, with an estimated ejection fraction (EF) of 20%. The patient had multiple LV wall abnormalities including akinetic inferolateral and apical anterior walls and hypokinetic basal and septal walls. A small pericardial effusion was also noted. Initial echocardiogram in (A) 4-chamber view shows multiple segmental abnormalities and an ejection fraction of 20%. (B) Parasternal long axis view shows multiple segmental abnormalities, trace effusion, and low ejection fraction of 20%.

NR

|                                                                                                                                  |                                                                                                                                                                                                                 |                          |
|----------------------------------------------------------------------------------------------------------------------------------|-----------------------------------------------------------------------------------------------------------------------------------------------------------------------------------------------------------------|--------------------------|
| pulmonary embolism                                                                                                               | significant reduction in the left ventricular ejection fraction to 25% with diffusely hypokinetic walls and a reduction in right ventricular function.                                                          | NR                       |
| NR                                                                                                                               | severe global left ventricular systolic dysfunction, RV enlargement, RV systolic dysfunction, moderate to large pericardial effusion, Intermittent RV impaired filling and collapse (s/o tamponade)             | normal coronary arteries |
| moderate bilateral pleural effusion                                                                                              | decrease in left ventricular ejection fraction at 45%, low cardiac output (3 L/min), and both subtle hypertrophy and akinesia of posterolateral left ventricular wall with small pericardial effusion opposite. | normal coronary arteries |
| bilateral, patchy peripheral ground-glass opacities with a crazy-paving pattern, focal consolidations, and mild pleural effusion | highly reduced ventricular function [left ventricular ejection fraction (LVEF) 22%, right ventricular ejection fraction (RVEF) 28%                                                                              | no                       |
| pneumonia                                                                                                                        | hyperdynamic ventricular function, although under massive support of inotropic agents and vasopressors.                                                                                                         | no                       |
| NR                                                                                                                               | enlarged heart with a marked decrease in ventricular systolic function and an ejection fraction of 20%                                                                                                          | no                       |

negative for pulmonary embolism,  
clear lungs with any typical  
characteristics of COVID-19

LVEF 55-60%, no wall motion abnormalities, no  
evidence of pericarditis or pericardial effusion

normal  
coronary  
arteries

NR

NR

NR

Diffuse bilateral interstitial  
inflammation with sub-pleural  
consolidations.

LVEF 34%, Dilated LV (LVEDD 56mm), severe  
and diffuse LV hypokinesia

Unremark  
able

---

## MR findings

subepicardial late gadolinium enhancement of the apex and inferolateral wall

mild systolic dysfunction (LVEF = 49%) with discrete global hypokinesis, pericardial effusion localised mainly around the left ventricular lateral wall (~10mm), diffuse interstitial myocardial edema with an increased T2 signal intensity ratio, prolonged T1 relaxation times

diffuse high signal intensity in the LV myocardium, myocardial wall thickening (which suggested myocardial wall edema), extensive transmural late gadolinium enhancement

recovery of systolic function (day-7), with the persistence of mild hypokinesia at basal and mid left ventricular segments, diffuse myocardial edema, determining wall pseudo-hypertrophy,

NR

focal infero-basal LV wall edema, elevated T1 and T2 myocardial relaxation times, the post-contrast sequences showed sub-epicardial and mid-wall late gadolinium enhancement in the basal inferior, basal infero-lateral, and anterior LV walls LVEF 22%, late gadolinium enhancement images showed a pattern of extensive subepicardial and several midwall subepicardial spots of enhancement of the left ventricle, myocardial edema was absent (post-myocarditis state without active myocarditis)

increased wall thickness with diffuse biventricular hypokinesis, especially in the apical segments, severe LV dysfunction (LVEF 35%), biventricular myocardial interstitial oedema, Phase-sensitive inversion recovery sequences showed diffuse late gadolinium enhancement extended to the entire biventricular wall, pericardial effusion was confirmed,

NR

Cardiac magnetic resonance (CMR or cardiac MRI) imaging showed myocardial edema and hyperemia suggestive of active myocarditis

NR

NR

NR

NR

NR

-

extensive subepicardial  
fibrosis with diffuse contrast uptake at the level of the pericardium

Cardiac magnetic resonance imaging showed an area of myocardial late enhancement compatible with the diagnosis of myocarditis

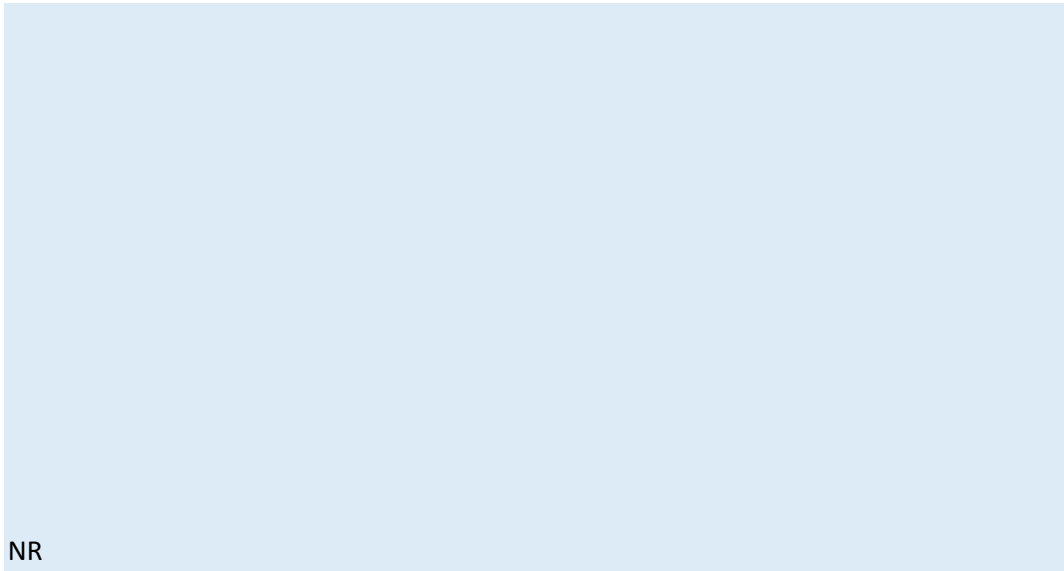

NR

T2 sequences showed diffuse hyperintense myocardium but suffered from too many artefacts to be considered diagnostic quality. Steady-state free precession cine images demonstrated a biventricular cardiomyopathy (left ventricular ejection fraction: 25%) with myocardial wall thickening. First-pass contrast-enhanced CMR did not reveal subendocardial perfusion defect. Late gadolinium enhancement images demonstrated massive, heterogeneous, and predominantly subepicardial enhancement of the left ventricular myocardium indicating a severe inflammation, without evidence for ischaemic heart disease

NR/ normal biventricular volumes and function. There was akinesia of the apico-lateral, apico-inferior walls and apical cap, myocardial hyperemia, and myocardial scar/necrosis consistent with a diagnosis of myocarditis

n MRI of both lower limbs confirmed features of diffuse myositis with symmetrical appearances involving the anterior, medial and posterior muscle compartments of the thighs with subcutaneous oedema. . A cardiac MRI showed normal left and right ventricular function, with possible evidence of myocardial oedema in the basal inferoseptum, in keeping with myocarditis, as well as a 16 mm circumferential pericardial effusion

NR

cardiac magnetic resonance imaging (MRI) was performed , which showed inflammatory manifestations, with the recovery of the ejection fraction

NR

NR

NR

myocardial necrosis, fibrosis, and hyperemia, indicating myocarditis according to the Lake Louise criteria

patient A—native T1 map showing prolonged T1 relaxation times in the posterior interventricular septum and corresponding late gadolinium enhancement image (LGE) with enhancement in the posterior septum (arrowhead), consistent with acute myocarditis. Transthoracic echocardiography showed a preserved left ventricular (LV) systolic function (EF 60%) without any wall motion abnormalities, but focal echo-bright appearance of the interventricular septum (not shown) and slightly impaired global longitudinal strain. The two right panels: patient B—representative cMRI scans of the patient who had a history of coronary artery disease treated by percutaneous coronary intervention (everolimus-eluting stent in the right coronary artery). T2-short T1 inversion recovery image, showing diffuse myocardial oedema and LGE image with subtle subepicardial enhancement of the lateral wall (arrowheads).

Left ventricular function, volumes, and mass were in normal range (ejection fraction 64%, stroke volume 62.2 mL, end-diastolic volume 97 mL, end-systolic volume 34.8 mL, mass 128 g) (Video 1). T2 short tau inversion recovery (STIR) sequence revealed a subepicardial high signal intensity in the mid posterolateral wall of the left ventricle which suggests myocardial wall edema (Fig. 2A). Cardiac MRI showed subepicardial late gadolinium enhancement of the posterolateral wall in the mid ventricle-suggestive of myocarditis at 5 and 10 min after contrast administration, respectively

The CMR scan confirmed normal LV and RV function and wall thickness with an LV ejection fraction of 65%, RV ejection fraction of 56% and wall thickness at end-diastole of 7 mm. There was delayed late gadolinium enhancement (LGE) within the mid-wall as well as the epicardial regions involving the LV basal inferolateral wall, mid-anterolateral and mid-inferolateral wall. T2 short tau inversion recovery (STIR) black blood imaging showed high signal intensity within the LV anterolateral, inferolateral wall at the base and mid-ventricle level. On non-contrast T1 mapping, there was a prolongation of T1 time at the mid-ventricle segment 5 ( $1212 \pm 141$  ms) and segment 6 ( $1113 \pm 93.8$  milliseconds).

late subepicardial enhancement predominating in the inferior and lateral wall

diffuse biventricular and  
biatrial edema with a small area of late gadolinium  
enhancement (LGE)

NR

confirmed normal LV dimensions and function (LV ejection fraction of 59%) and revealed the presence of right and left apical microaneurysms. Late gadolinium enhancement (LGE) imaging showed a subepicardial area in the infero-lateral wall on basal and mid-ventricular planes; corresponding mapping sequences documented a focal increase in native T1 values, extracellular volume fraction and T2 mapping values consistent with diffuse edema and combined extracellular matrix expansion

normal LV size with mildly reduced ejection fraction (LVEF) of 50%; T2-weighted oedema sequence with its post-analysis T2 ratio showed oedema/inflammation in the mid inferoseptal and inferior wall. Late gadolinium enhancement showed subepicardial fibrosis in the mid inferior wall

left atrial enlargement and global left ventricular hypokinesia with ejection fraction of 20%. The T2-weighted sequence did not show myocardial edema. In contrast, imaging with the use of late gadolinium enhancement demonstrated a large, patchy, and linear nonischemic pattern of fibrosis localized subepicardially and intramurally in the basal and midcavity segments of the inferior and inferolateral wall and in the apical segments of the inferior wall

no

biventricular dysfunction with an LVEF of 30%. STIR sequences showed biventricular oedema and reduced myocardial T1

focal hypertrophy in the antero-septal and inferior segment of the LV extended over approximately 62mm, and in antero-inferior of the RV extended over 27mm, in hyper signal T2, with an intense enhancement on the tardive injected sequences compared to the rest of the myocardium in favor of a myocarditis

diffuse myocardial oedema

high signal of T2-weighted black blood in the anterior, interventricular septal, and posterolateral walls of the LV (A, short-axis) and late gadolinium enhancement in the posterolateral wall of the LV

Minimal pericardial effusion and contrast enhancement of the pericardium but not the myocardium were seen on magnetic resonance imaging scan

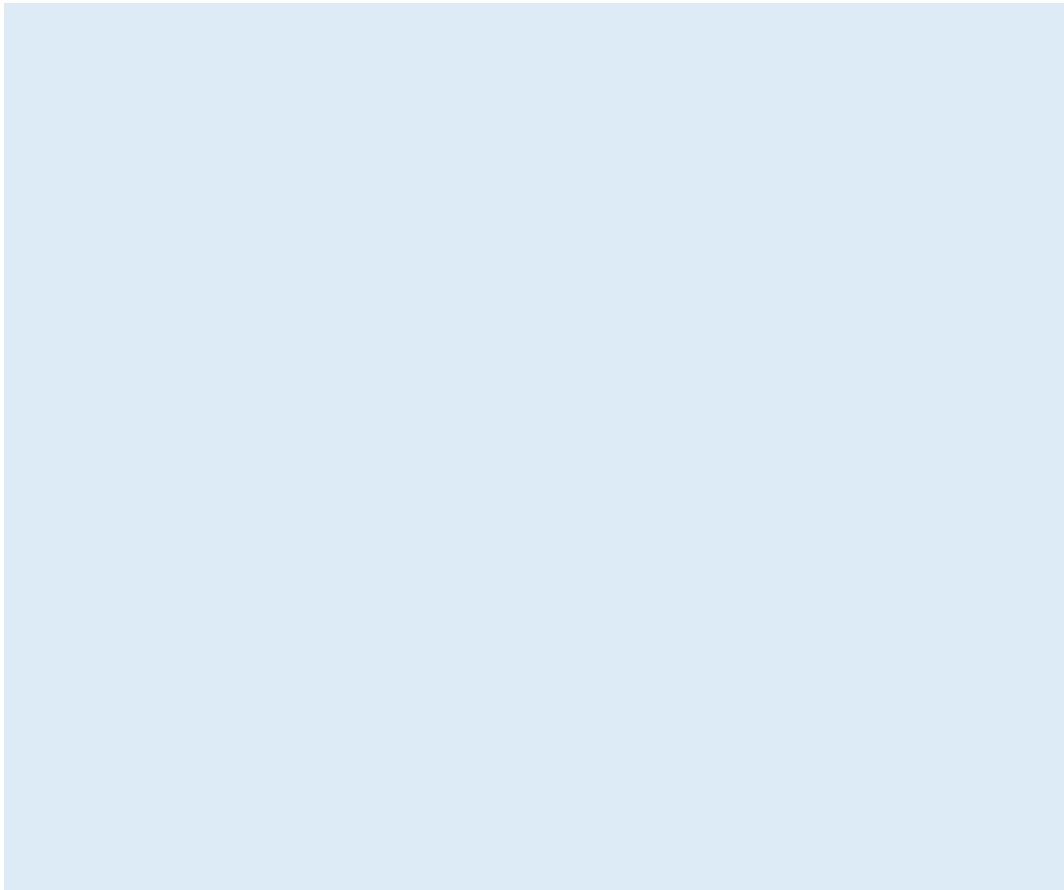

NR

mild to moderately reduced LVEF (38%); moderate hypokinesis of midventricular inferolateral wall; edema/inflammation of epicardium and epicardial scar of basal anteroseptal and anterior wall and midventricular anterolateral, inferolateral and inferior wall

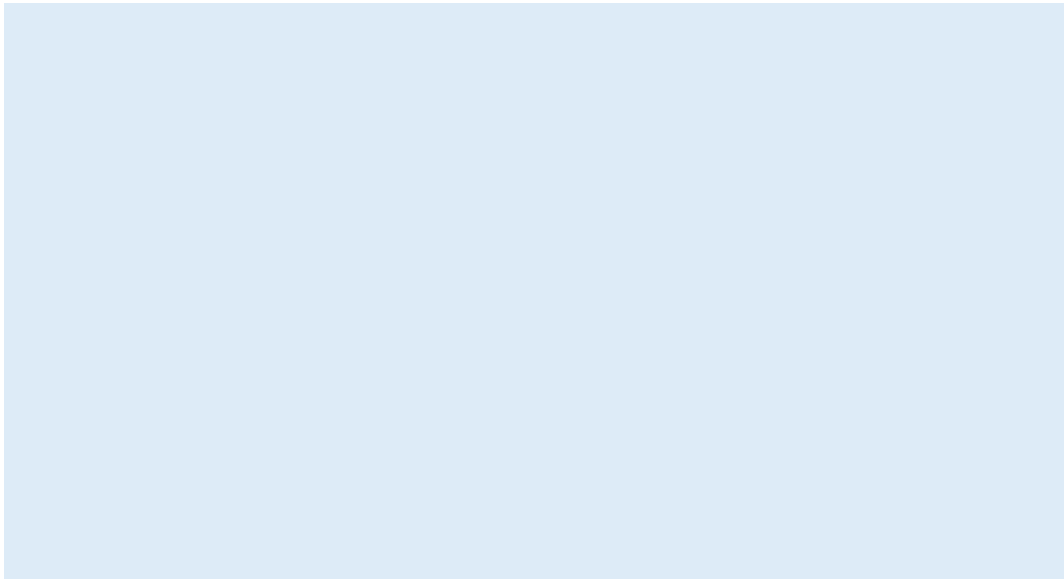

NR

NR

NR

normal left ventricular size (left ventricular end-diastolic volume index: 75 mL/m<sup>2</sup>) and mild systolic dysfunction (left ventricular ejection fraction: 45%) with global hypokinesia. The presence of myocardial inflammation was confirmed by T2 mapping (global T2 relaxation times: 62 ms; centre-specific cut-off value for acute myocarditis:  $\geq 55$  ms). Late gadolinium enhancement imaging (inversion time by using the Look-Locker technique: 280 ms) showed focal lateral subepicardial enhancement with prolonged T1 relaxation times (global T1 relaxation times: 1160 ms; centre-specific cut-off value for acute myocarditis:  $\geq 1000$  ms). Cardiac magnetic resonance imaging also showed small pericardial effusion.

late gadolinium enhancement (LGE) of the entire left ventricular myocardium with intracardial thrombi was detected on MRI (Figure 1B–K). T1 and T2 times were markedly prolonged, reflecting acute oedema following myocardial inflammation

no

no

not performed

right pulmonary condensation along with associated pleural effusion, LV of normal volume with concentric hypertrophy and mild depressed systolic function (LVEF 53%) secondary to diffuse hypokinesia was observed. Global longitudinal strain was decreased. Myocardial oedema with a predominant subepicardial pattern was seen in the lateral, anterior, inferior, and apical segments on T2 short tau inversion recovery and T2 mapping sequences, determining wall pseudo-hypertrophy. Pericardial oedema without associated effusion was also observed. Native T1 and extracellular volume both were increased in relation to the acute inflammatory process. Late gadolinium sequences showed extensive, patchy intramyocardial/subepicardial enhancement affecting the entire lateral, anterior, inferior, and apical septal walls and the pericardium.

NR

---

---

**Lake-Louis Criteria (yes/no)**

**Biopsy findings**

yes

yes

yes

yes

diffuse T-lymphocytic inflammatory infiltrates (CD3+ >7/mm<sup>2</sup>) with huge interstitial edema and limited foci of necrosis

myocarditis with inflammatory infiltrates consisting of a majority of lymphocytes and neutrophils, oedema but not typical myocyte necrosis, CD-4-positive T lymphocytes, RT-PCR for SARS-CoV-2 and PCR for other cardiotropic viruses was negative

diffuse lymphocyte infiltration in the interstitium of the myocardial tissue, atrophy and shedding degeneration myofibrils, no myocardial necrosis

yes

NR

no

focal subendocardial fibrosis and no signs of clinical relevant rejection

yes

NR

no

NR

NR

NR

eosinophilic infiltrate of the myocardium (infiltrate consisting mainly of mononuclear cells - few lymphocytes and histiocytes with many eosynophiles)

NR

mixed inflammatory infiltrate with lymphocytes, histiocytes, neutrophils, eosynophiles

NR

mild lymph-histiocytic interstitial myocardial infiltrate with occasional neutrophil

NR/ no

NR

yes

NR

NR

multifocal inflammatory infiltrates consisting of neutrophilic granulocytes, lymphocytes and histiocytes, capillarostasis, and perifocal single-cell necroses of cardiomyocytes

no

no

no

NR

no

Mild lymphocytic infiltration and moderate to severe perivascular fibrosis with wall thickening of intramural arterioles. There was no sign of severe myocardial injury compatible with typical active myocarditis. However, ischemic changes were found with a focal coagulative necrotic area at microvascular level (approximately 0.08 mm<sup>2</sup> in area) with losing nuclei, accompanied by microthrombi with fibrin and platelets in small vessels. Scattered megakaryocytes were also seen in the capillaries. Microthrombi was seen throughout the specimens and myocytes in non-necrotic areas often showed diffuse cytoplasmic vacuolization. The presence of platelets in obstructive and non-obstructive microthrombi within the lumens of microvessels was confirmed by immunohistochemical expression of CD61. Fibrin-rich microthrombi were also present as confirmed by phosphotungstic acid-hematoxylin (PTAH) stain. Microvessels including intramural arterioles often showed swollen endothelial cells.

no

diffuse interstitial and perivascular neutrophilic and lymphocytic infiltration with rare eosinophils and rare myocyte necrosis, suggesting fulminant myocarditis

no

A subtle mild interstitial infiltrate consisting mostly of CD68+ macrophages along with a lesser number of CD3+ T cells. Microthrombi were identified, with the degradation products present suggestive of a sub-acute microangiopathic process. No fibrosis nor myocardial necrosis was present. No viral particles were seen on electron microscopy. With regard to other causes of myocarditis, the EMB did not show interstitial fibrosis, iron accumulation, evidence of sarcoid or amyloid, or changes consistent with hypertrophic obstructive cardiomyopathy.

no

NR

no

slight interstitial fibrosis without inflammation. Immunohistochemical staining (CD3, CD20, and CD68) confirmed the absence of interstitial inflammation

no

no

explantated heart, with large areas of myocardial necrosis, suppurated lesions, and lymphocytic infiltration, polymorphic inflammatory infiltrate, mostly in myocardium areas but focally extended to endocardium and pericardium. Lymphocytes were predominant. Infiltrate also contained plasmocytes, neutrophils, eosinophils, and histiocytic and giant cells. Clusters of neutrophils with leucocytoclasia suggested suppurated lesions. Myocardial cells were suffering with clarified cytoplasm, sometimes fibrillary or eosinophil, and with enlarged dystrophic nucleus. Large areas of necrosis and haemorrhage were seen among these inflammatory areas. Adjacent myocardium showed interstitial oedema and focally recent interstitial fibrosis. Ziehl, Grocott, Gram, and EBER ISH stains were negative. Most of lymphocytes were T phenotype CD5+, with only a few associated B lymphocytes CD20+. Numerous histiocytic cells were revealed by CD163 immunostaining. Cytomegalovirus immunostaining was negative as well as Epstein–Barr virus in situ hybridization. A (×2) and B (×20): necrosis and polymorph inflammatory infiltrate with haematic suffusion in endocardium and myocardium. C (×10) and D (×20): pericardial inflammatory reaction.

yes

NR/ no

NR

no

NR

NR

Biopsy after death - Microscopic examination of the heart revealed the existence of a multifocal inflammatory infiltration, in both ventricles and septum, composed in its majority of macrophages and lymphocytes (Fig. 1), associated with a mild polymorphonuclear neutrophils infiltrate. The myocardium was edematous, containing dystrophic cardiomyocytes, without necrosis. An hypocellular confluent area of fibrosis was found in posterior wall of left ventricle. There was no significant inflammatory infiltrate in the wall of capillaries and vessels.

no

patient did not consent

NR

NR

NR

yes

NR

yes

Immunohistochemistry and histology revealed myocardial inflammation in the absence of cardiomyocyte necrosis (Dallas criteria of 'borderline myocarditis'6), with increased lymphocytes (CD3, LFA-1, and CD45R0) and macrophages (Mac-1), in part with highly abundant perforin-positive cytotoxic T cells. The inflammatory process seemed to be paralleled by increased thickness of small arteries

no

EMB showed a significant infiltration of immune cells into the heart. Especially CD68+ macrophages but also CD3+ T cells were found to be located primarily around small vessels within the myocardium, as shown by immunohistochemical stainings. Masson Trichrome and HE stainings further demonstrated the presence of perivascular fibrosis in serial tissue sections, but no myocyte necrosis

yes

no

yes

no

yes?

no

yes

no

no

no

diffusely mononuclear infiltrates associated with necrosis of adjacent myocytes

and necrotizing vasculitis of intramural coronary arteries associated to positivity of CD45RO+ T-lymphocytes of the affected vessel wall.

Arterioles

not infiltrated by inflammatory cells presented at

immunohistochemistry complement frac-

tions (C3d) deposition suggesting coexisting endothelitis. Moreover,

real time

PCR on two frozen endomyocardial samples for SARS-COV-2, and for the most common

cardiotropic viruses including adenovirus, cytomegalovirus, parvovirus B19, Epstein–Barr

virus, human herpes virus 6, and herpes simplex virus 1 and 2,

enterovirus, influenza virus

A H1N1 and B and hepatitis C virus was negative

yes

yes

not performed

no

not performed

no

not performed

no

not performed

yes

not performed

no

not performed

infiltration of interstitial mononuclear cells (Fig. 3). Infiltrating cells were

mainly T-cells and macrophages, with more CD4-positive cells than CD8-positive cells, and few B-cells (Fig. 3). RTPCR SARS-Cov-2 was negative in the myocardium.

Electron microscopy revealed inflammatory cell infiltration and myocyte damage compatible with myocarditis (Fig. 4). However, viral particles were not detected in the high-power fields.

Tests for viral antibodies (using paired serum samples) against adenovirus, coxsackie virus (A16, A7, B1, B2, B3, B4, B5, and B6), echovirus (3, 6, 7, 11, and 12), and parainfluenza virus (1, 2, and 3) were all negative

yes

mononuclear

infiltration of the myocardium, predominantly with T lymphocytes and macrophages, Myocardial biopsy shows mononuclear infiltration of the myocardium, with

CD3-positive lymphocytes (arrow) and CD68-positive macrophages (arrow), without formation of granulomas

no

NR

NR

NR

not performed

NR

NR

NR

NR

NR

NR

yes

multiple foci of lymphocytes in a diffuse inflammatory and oedematous back- ground.

yes

active lymphocytic myocarditis

no

Slightly diffuse interstitial mononuclear inflammatory infiltrates, dominated by lymphocytes. No thrombotic events were observed in the microcirculation of the heart. In the patchy areas, the lymphocytes 'interlocked' the myocytes, resulting in myocyte degeneration and necrosis (piecemeal necrosis). Intermingled with lymphocytes, only a very few individual polymorphous neutrophils were found in the affected areas. Signs of inflammation were present in both the epicardium and the myocardium.

no

not performed

no

not performed

yes

NR

Low-grade interstitial and endocardial inflammation. Large, vacuolated, CD-68-positive macrophages were seen with immunelight microscopy. The ultrastructural study demonstrated single or small groups of viral particles with the morphology and size of coronaviruses. The viral particles were observed in cytopathic, structurally damaged interstitial cells that demonstrated loss of cytoplasmic membrane integrity. Cardiac myocytes showed non-specific features of local myofibrillar lysis and lipid droplets. Interstitial fibrosis was minimal, focal, and mainly perivascular.

---

no

---

Dallas criteria (yes/no)

yes

yes

yes

no

no

NR

no

yes

yes

yes

no

NR

NR

NR

NR

NR

NR

NR

yes

no

no

yes

yes

yes

no

no

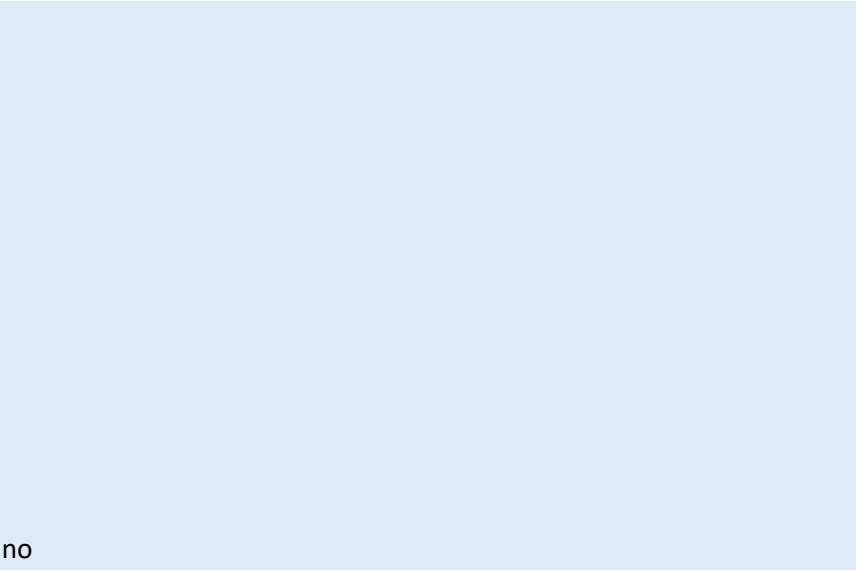

no

yes

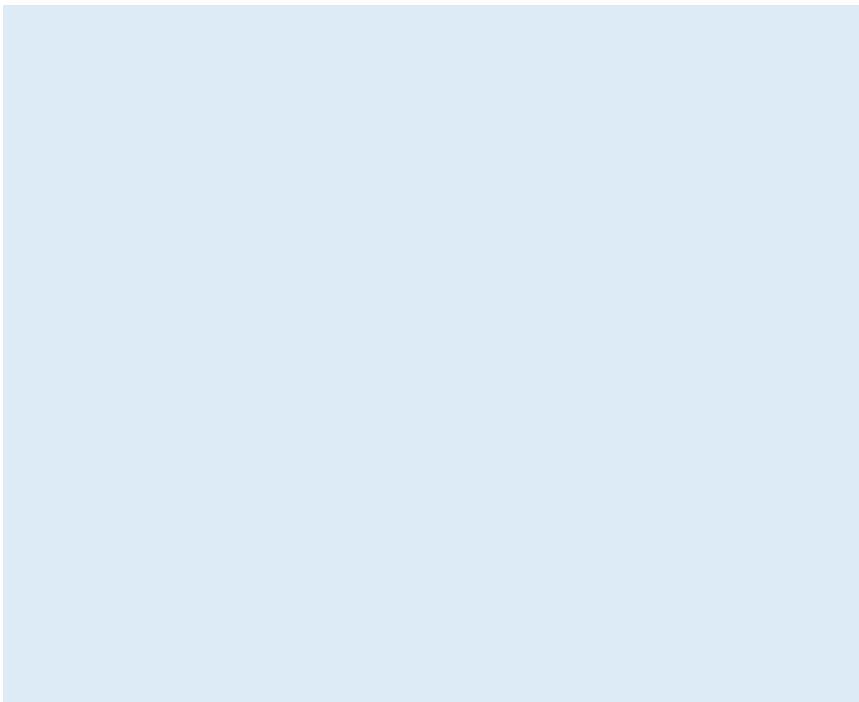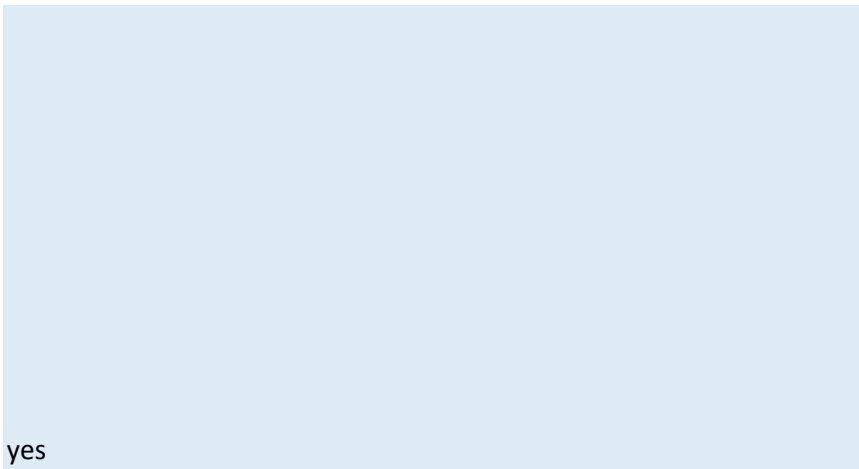

yes



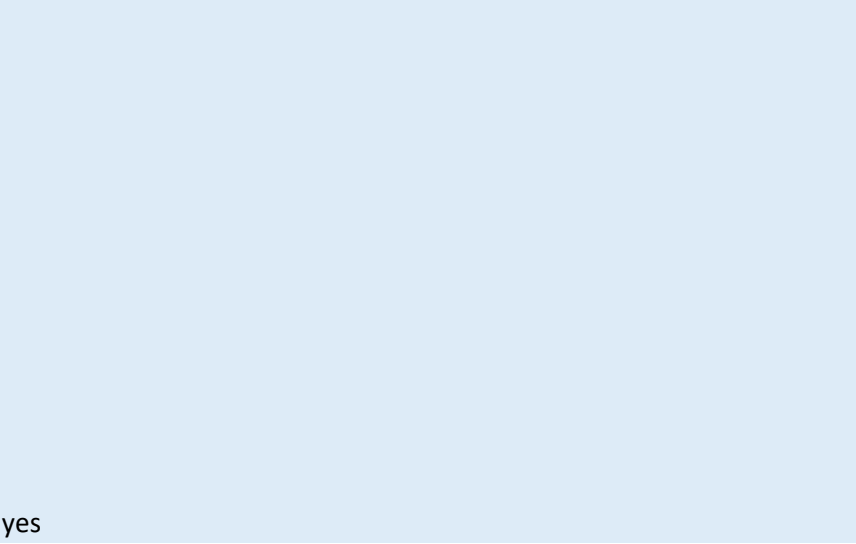

yes

no

no

no

no

no

yes

No

no

no

no

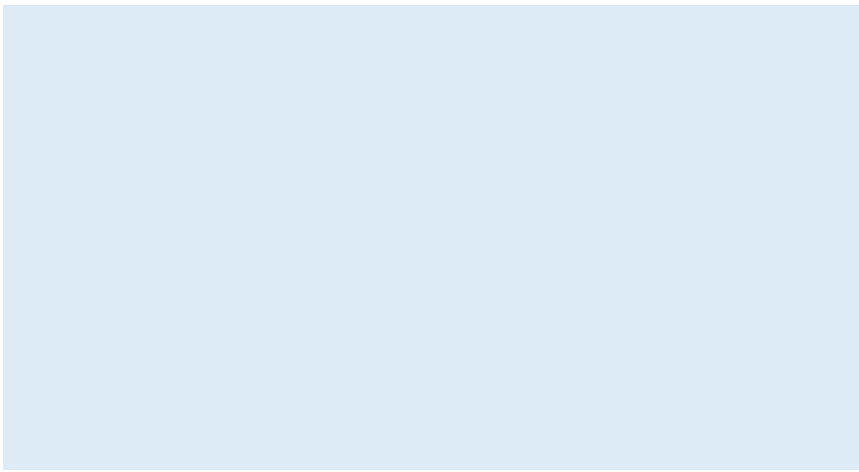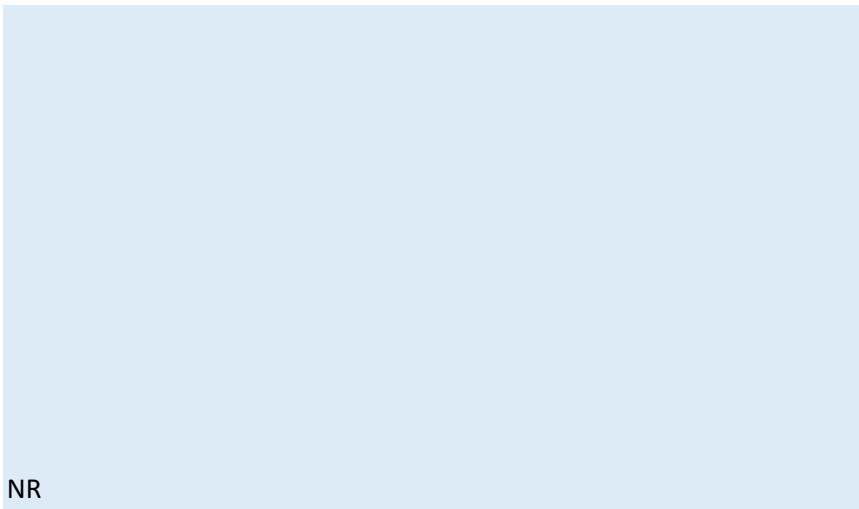

NR

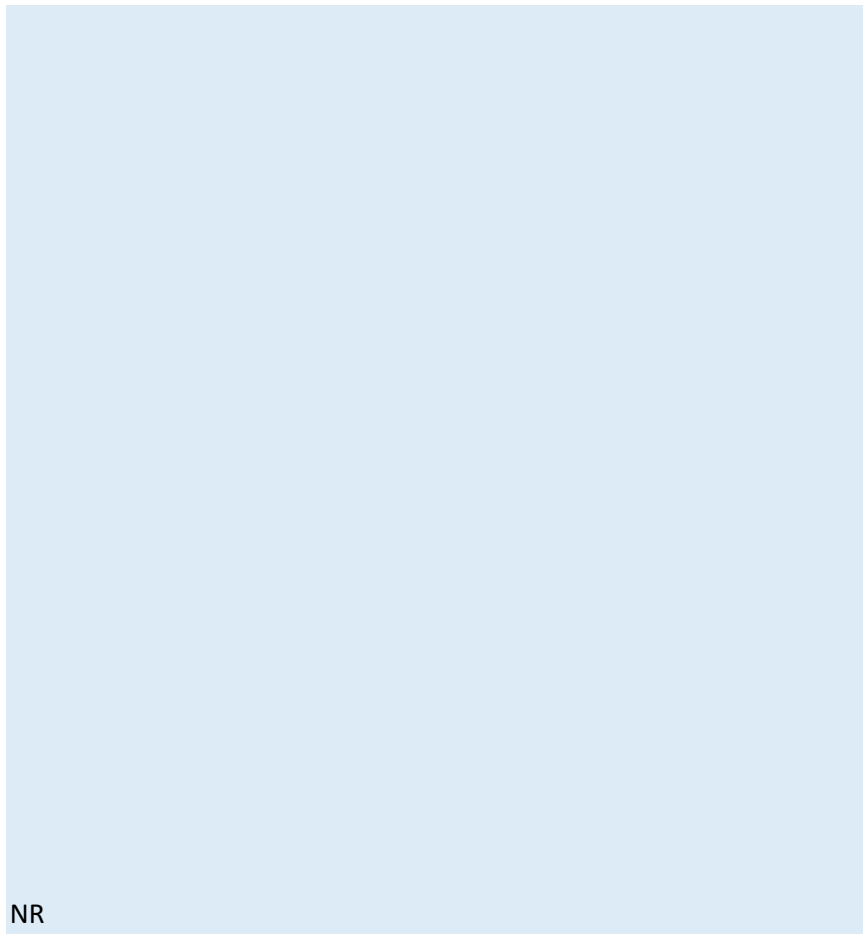

NR

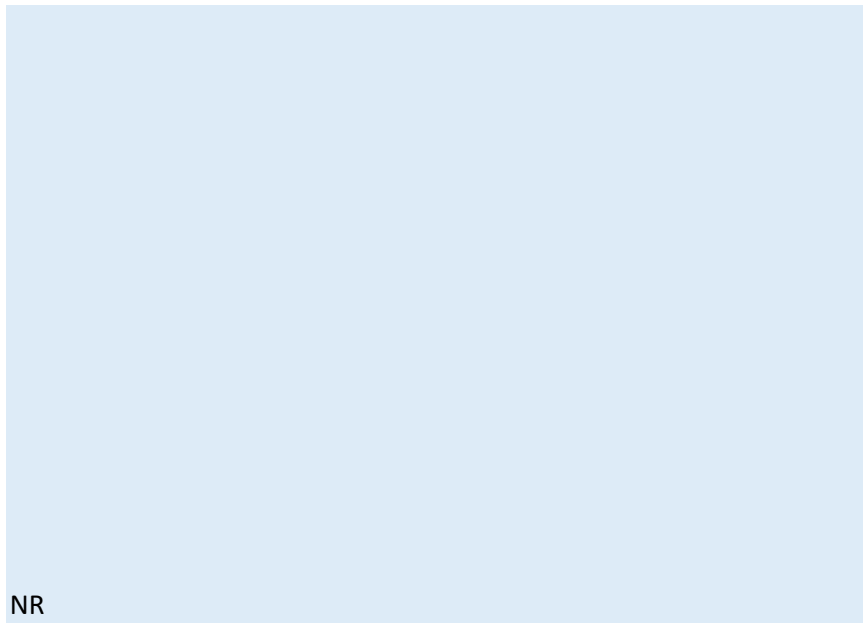

NR

NR

NR

yes

yes

yes

no

no

no

yes

---

---

**ESC Criteria (I) ECG/Holter/stress test (II)cardiac injury markers (TnT/TnI) (III) abnormalities on cardiac imaging (ECHO/angio/CMR) (IV) tissue charakterization by CMR**

I, II, III

II, III, IV

II, III, IV

I, II, III, IV,

I, II,

III, IV

II, III, IV

I, II, III, IV,

I, II,

II, III

I, II, III

II, III

II, III

II, III

II, III

I, II, III

II, III

II, III

I, II, III

I, II, III

II, III, IV

I, II

I, II, III

I, II, III

II

I, II, III

II, III

III, IV

I, II, III, IV

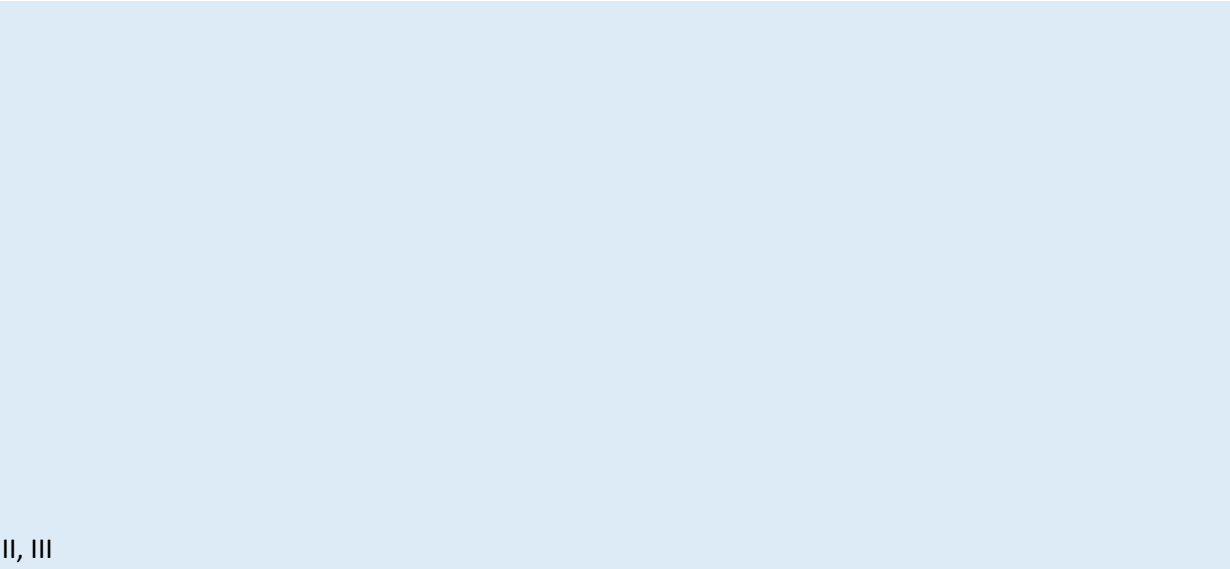

II, III

I, II,III, IV

II, III/ I, II, III, IV

I, II, III

II,

I, II, III

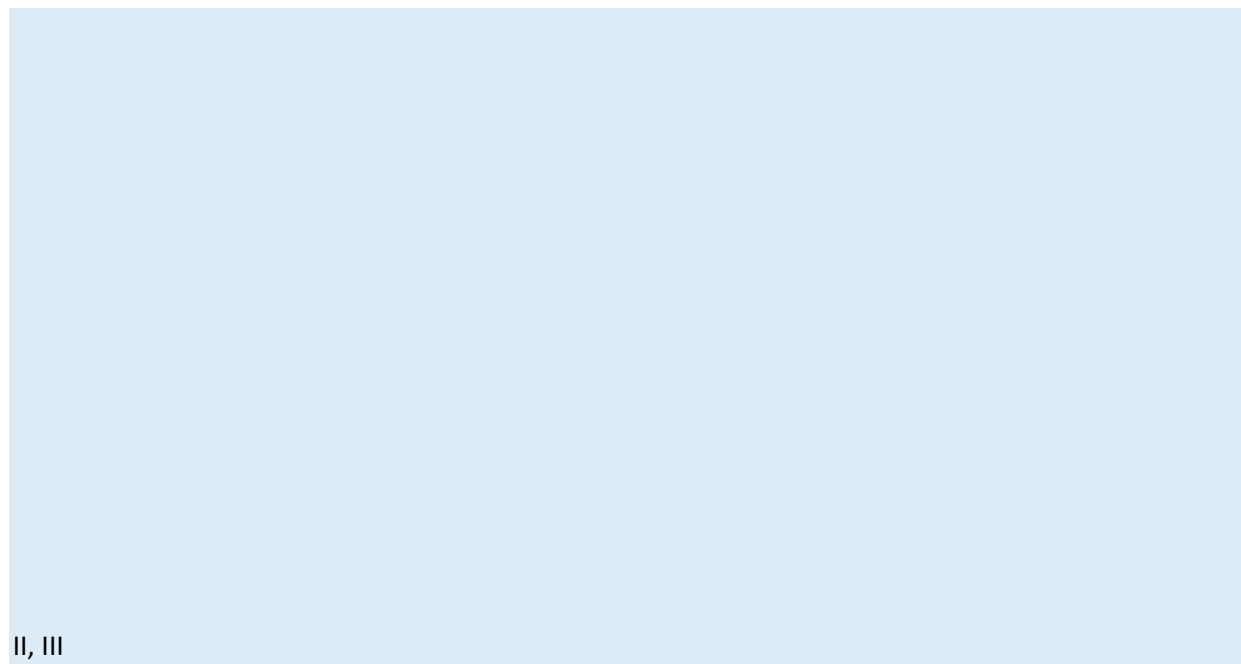

II, III

II, III

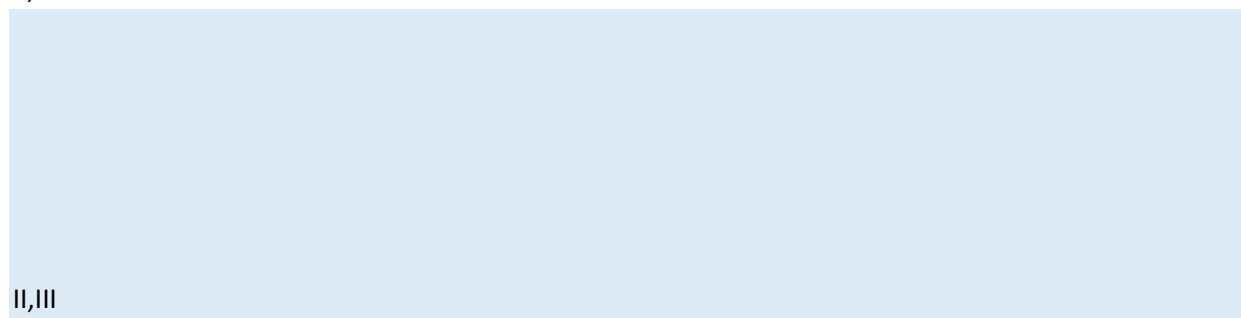

II, III

I, II, III, IV

I,II,III, IV

II, III

II, III, IV

I, II, IV

IV

II, III, IV

I, II, III

I, II, IV

III, IV

II, III

II, III

II, III

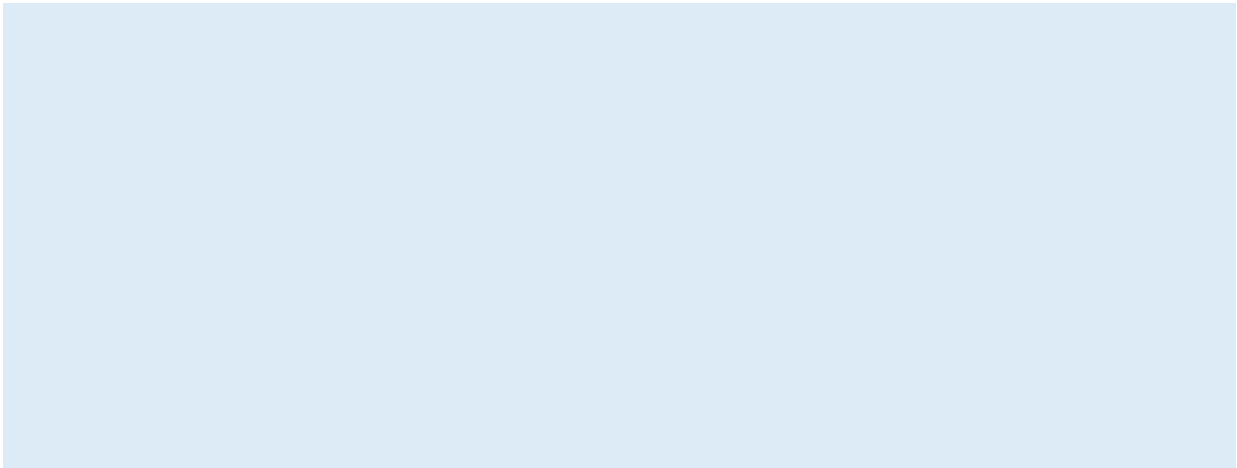

I,II, III, IV

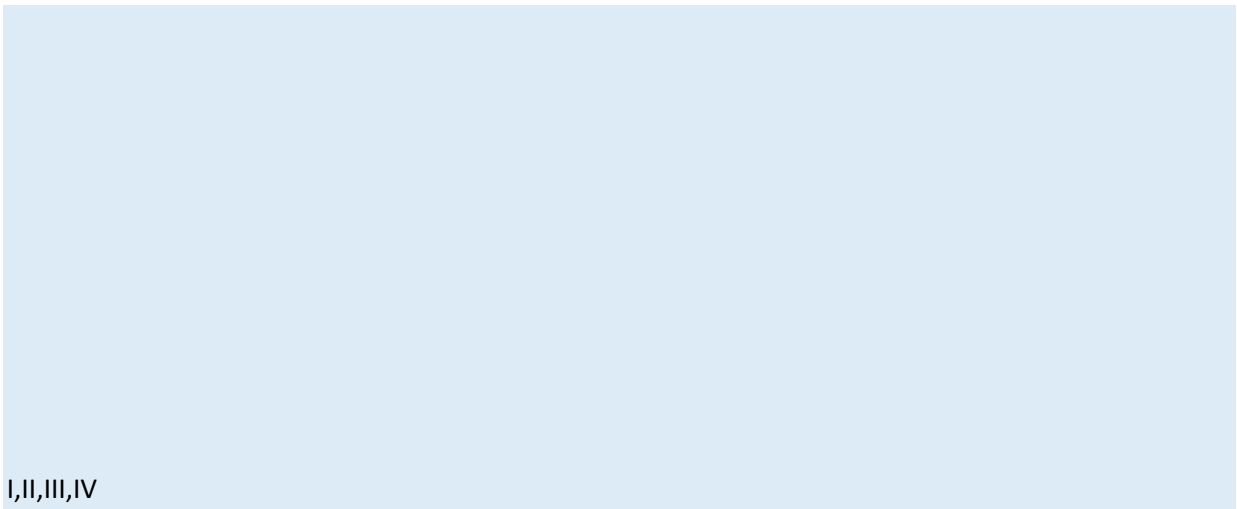

I,II,III,IV

II,III

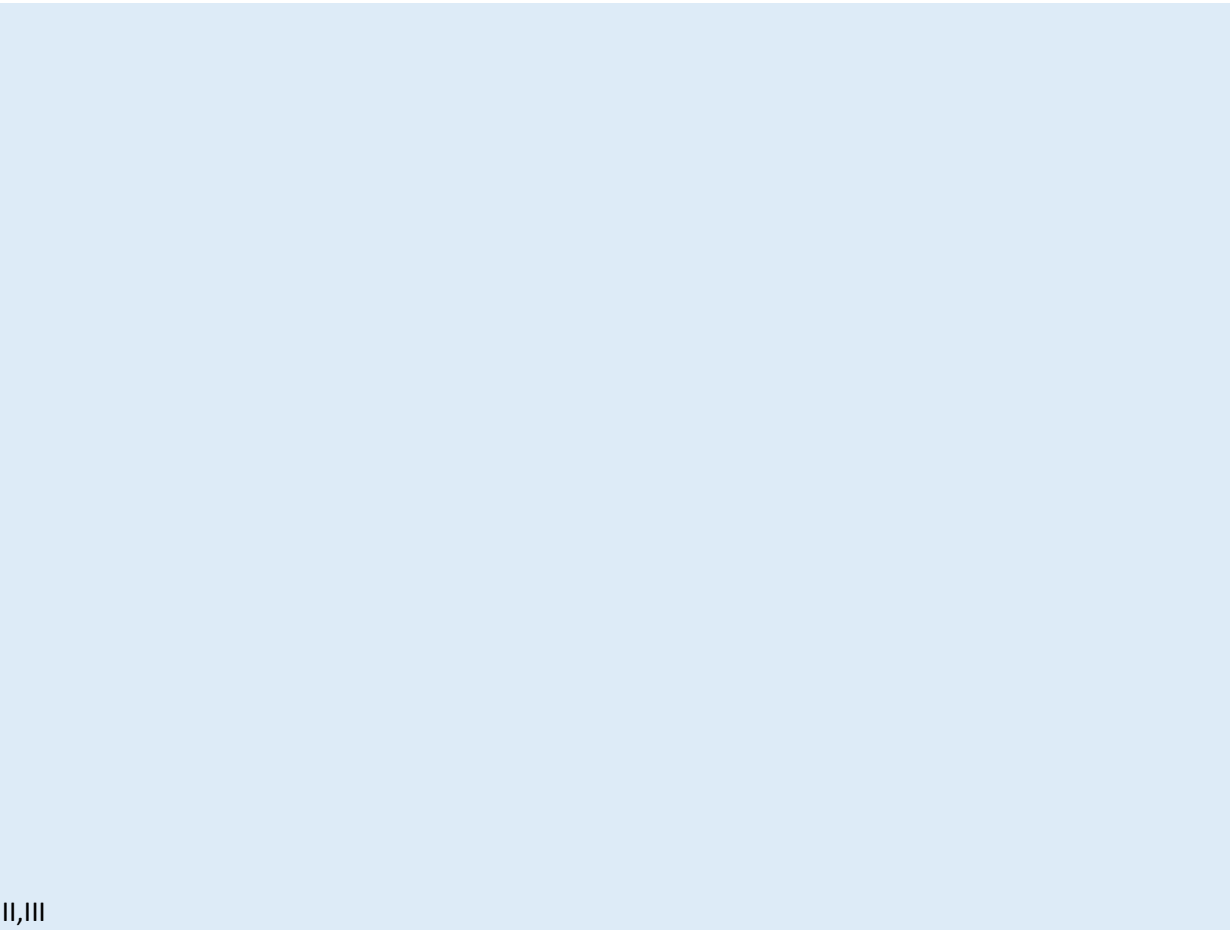

II,III

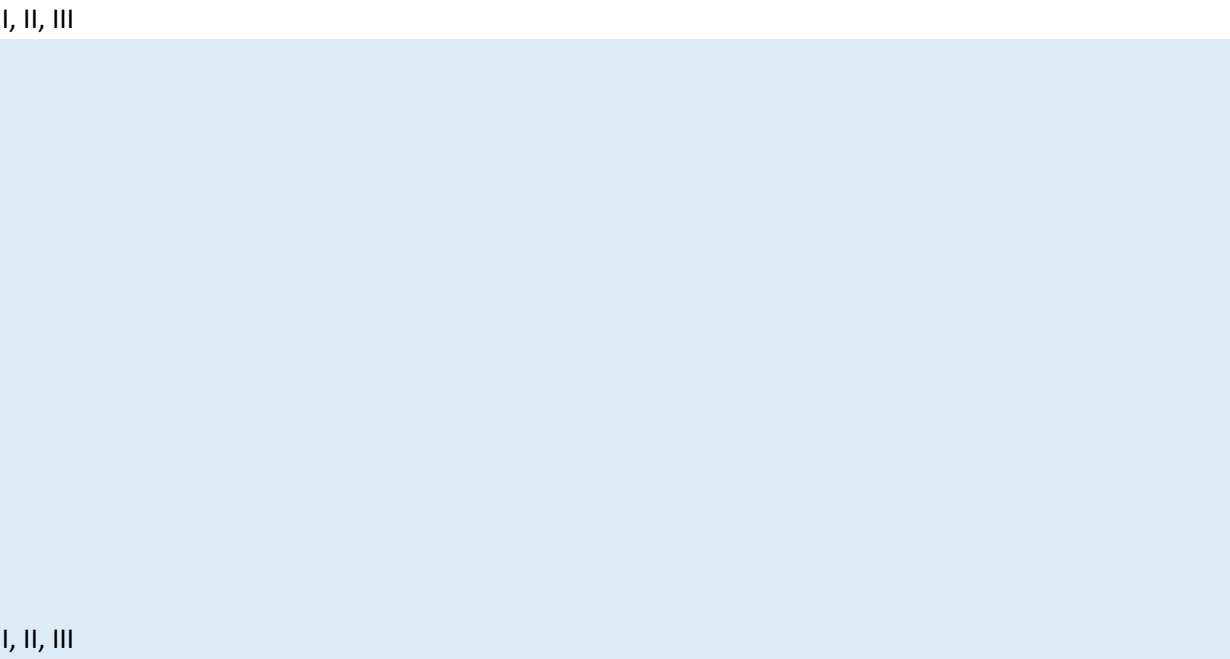

I, II, III

I, II, III

I, II, III

I, II, III

II, III

II, III, IV

I, II,

I, II, III

I, II

I, II, III, IV

II, III

---

ESC criteria summary ex. I, II, III = 3 (number)

Managment and outcome

3

3

3

4

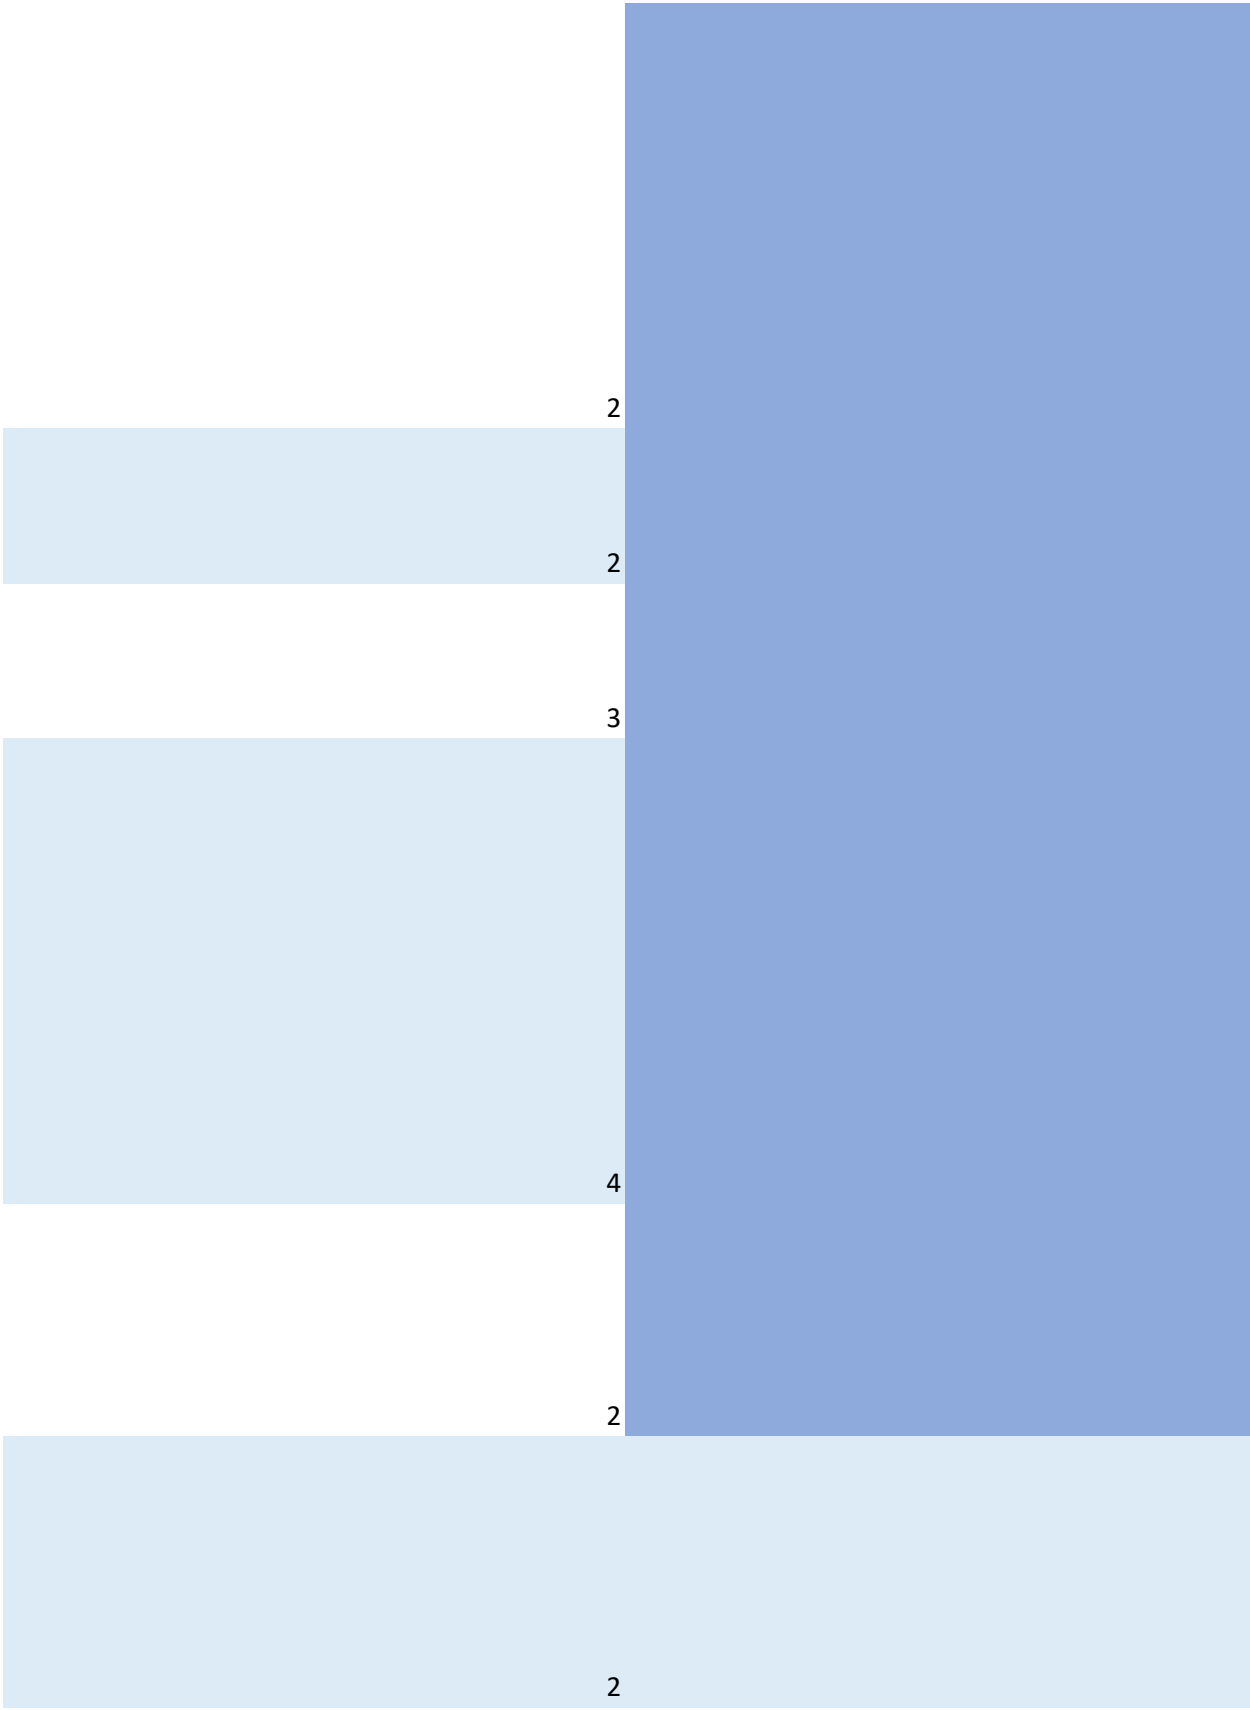

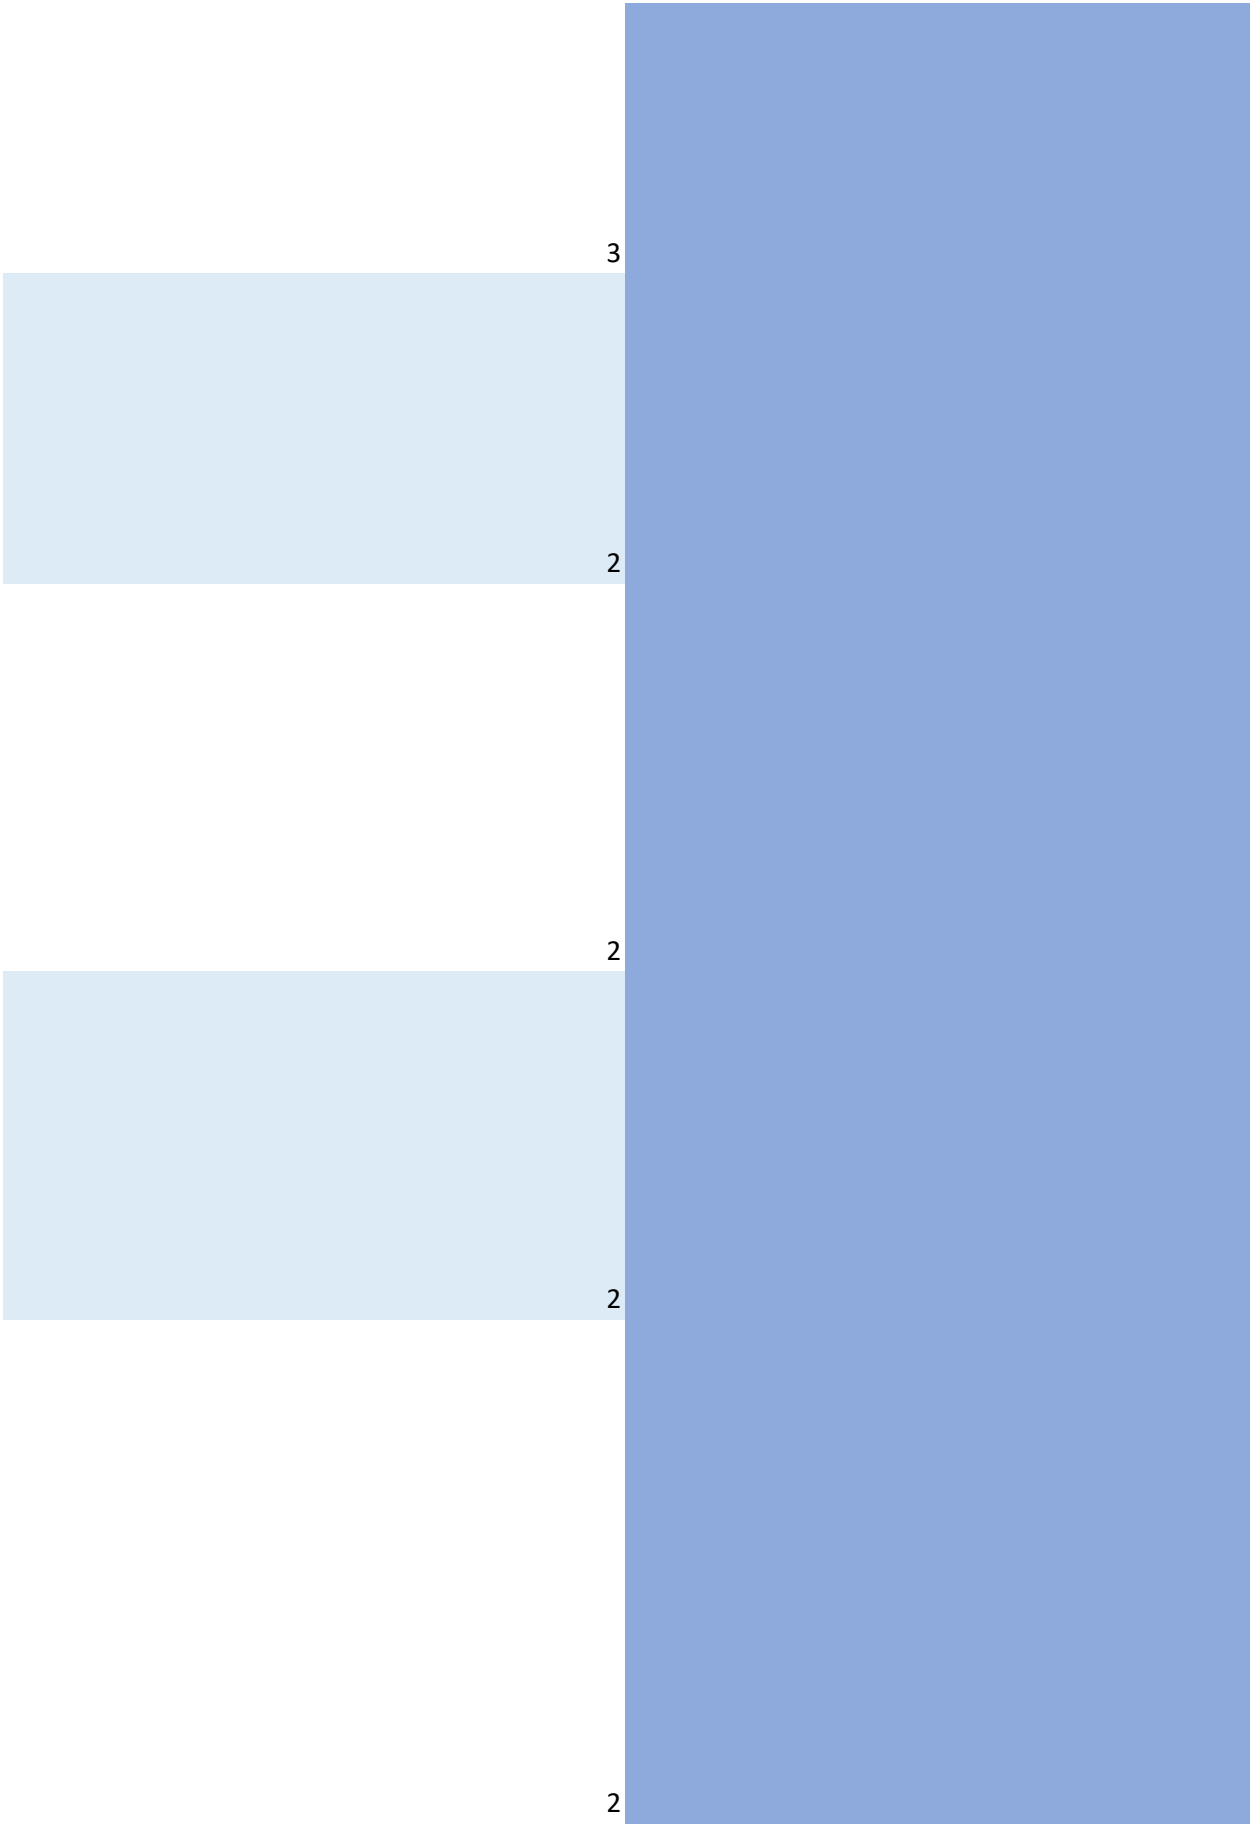

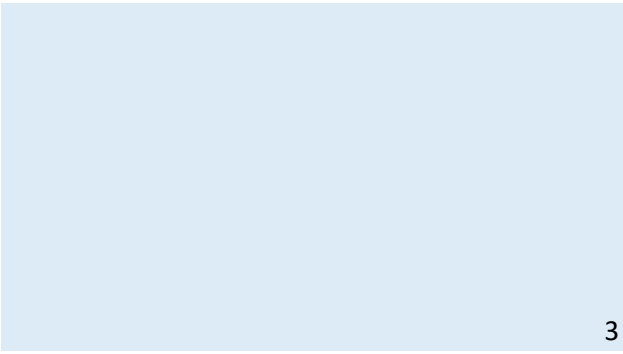

3

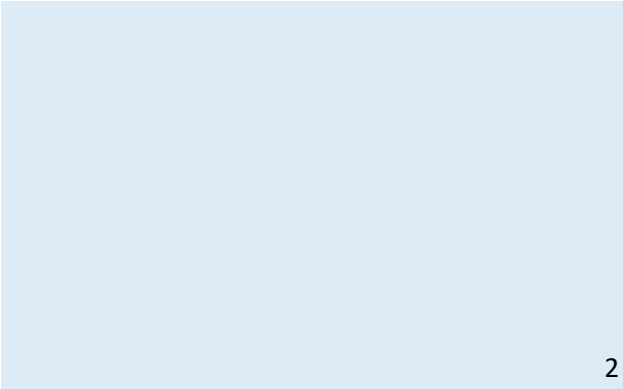

2

2

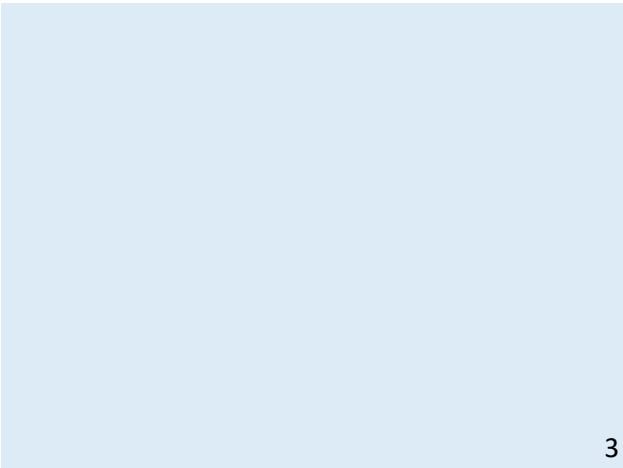

3

3

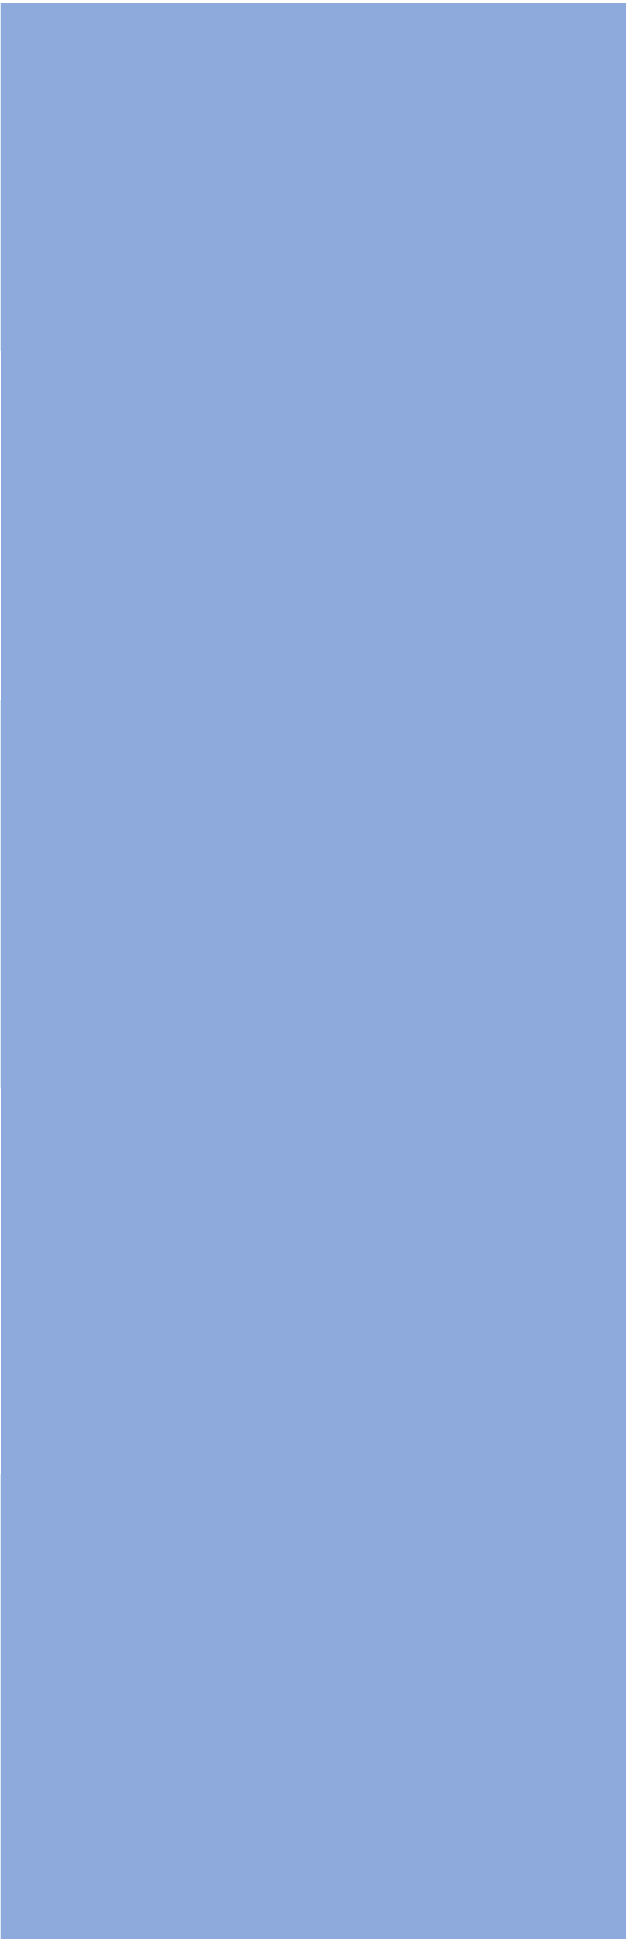

3

2

3

3

1

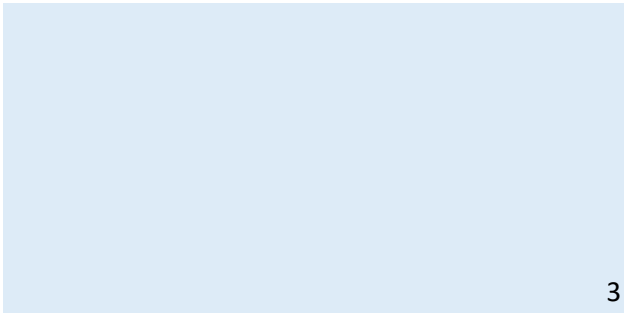

3

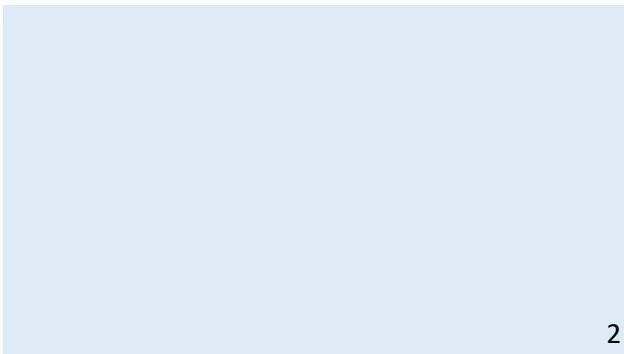

2

2

4

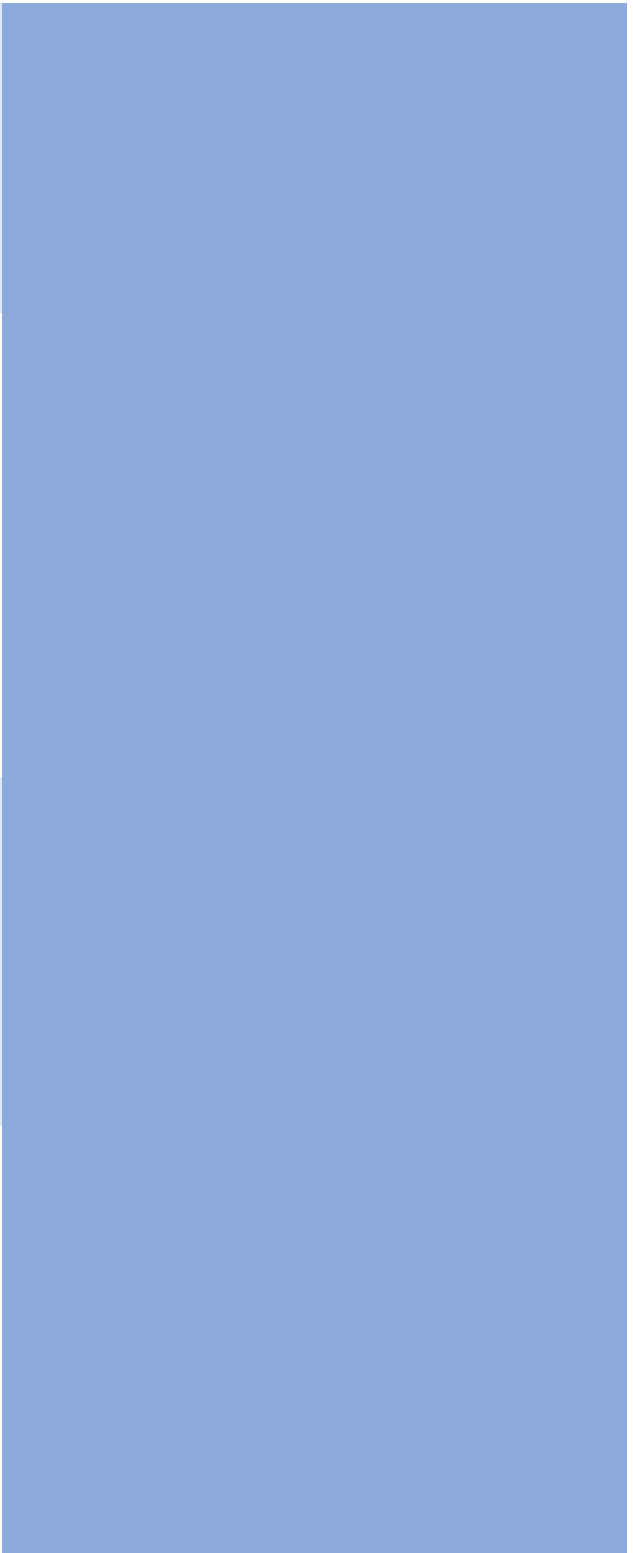

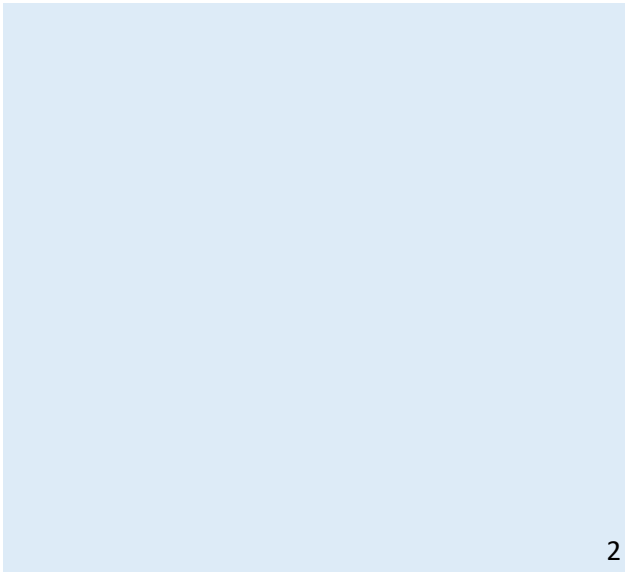

2

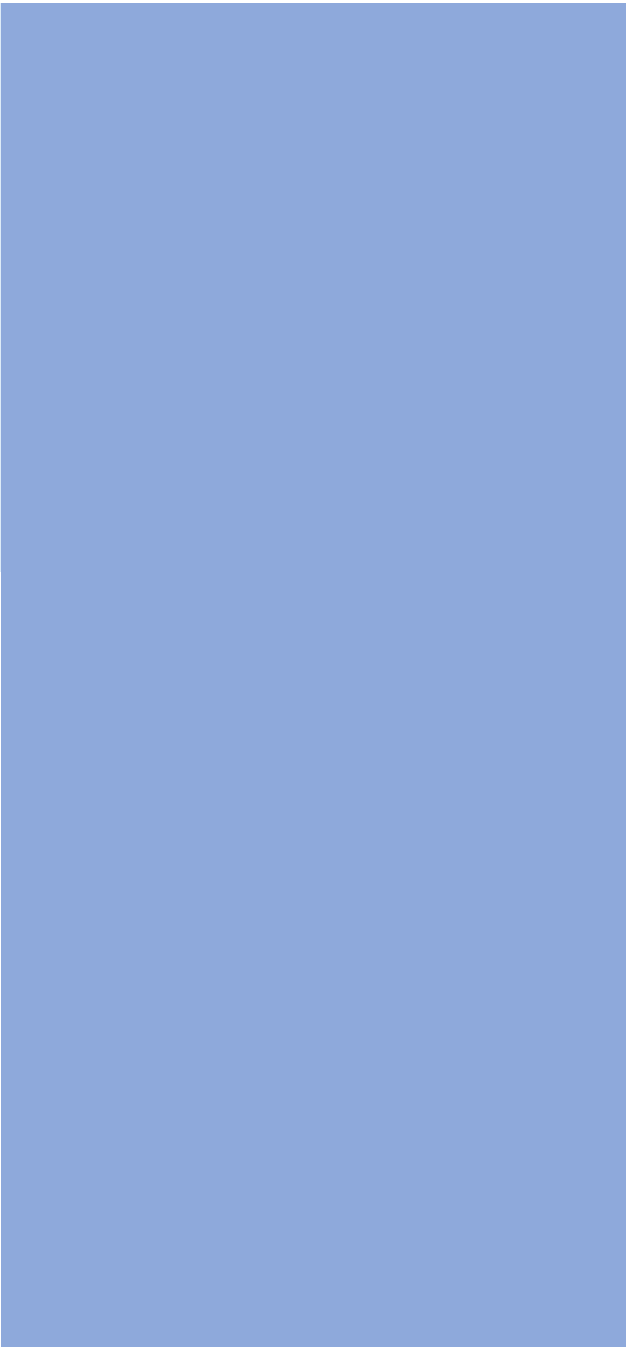

4

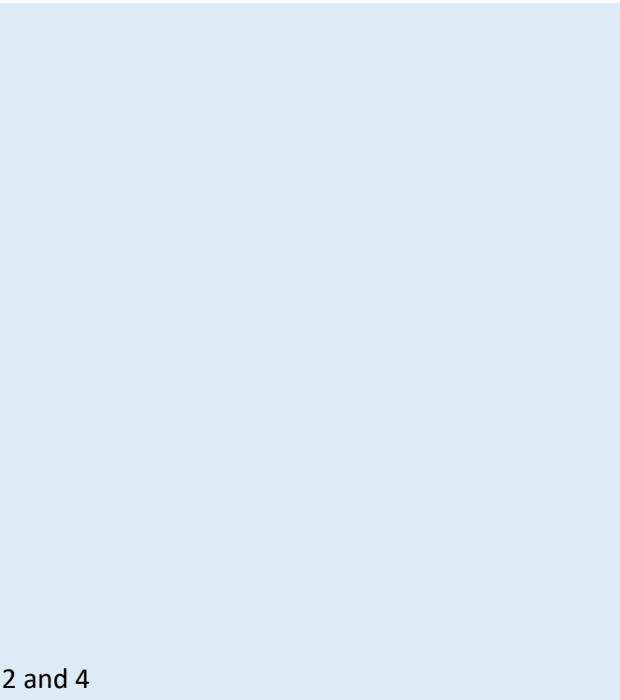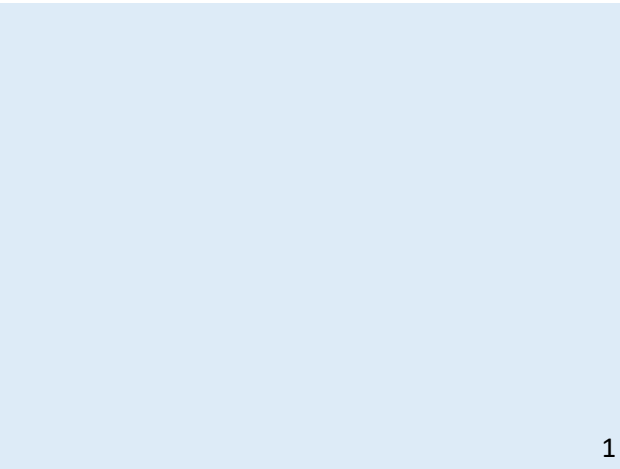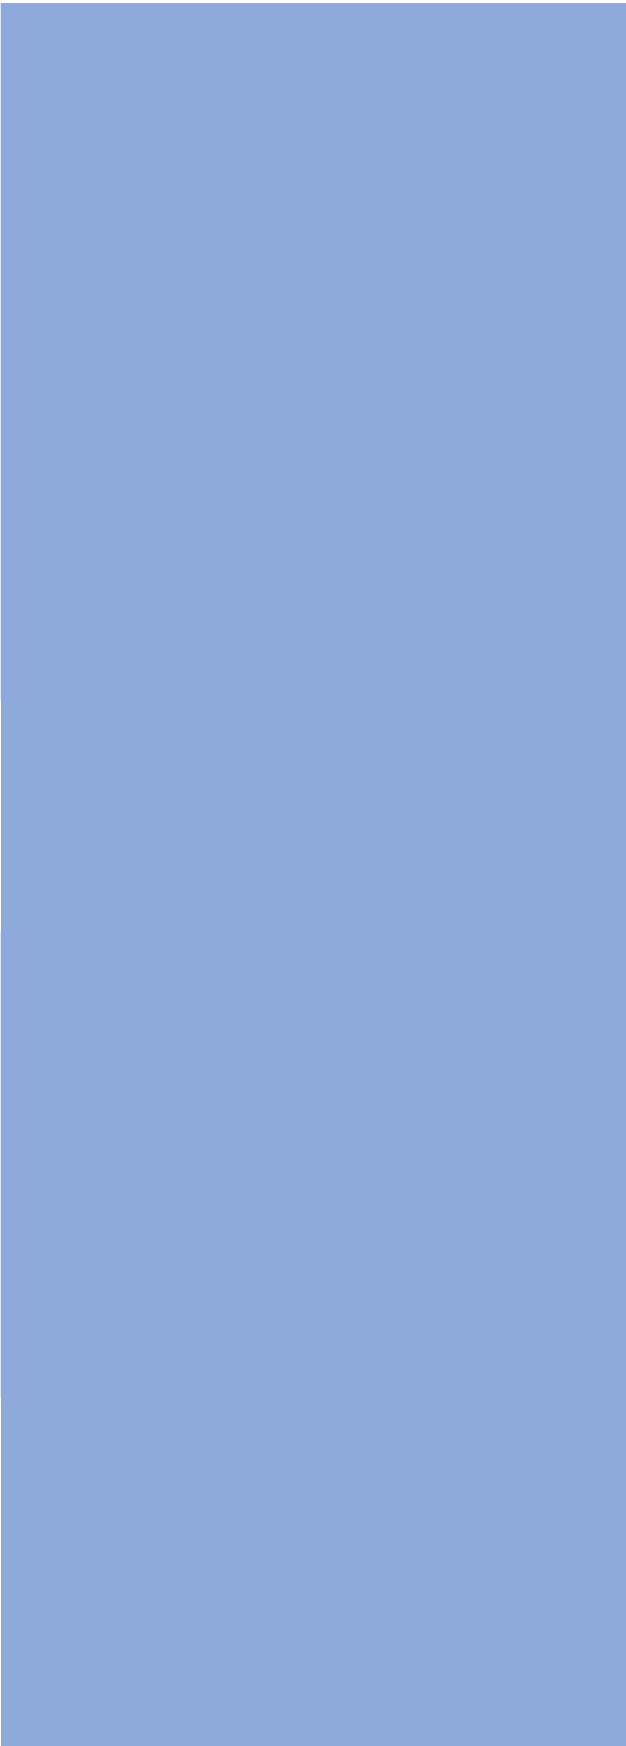

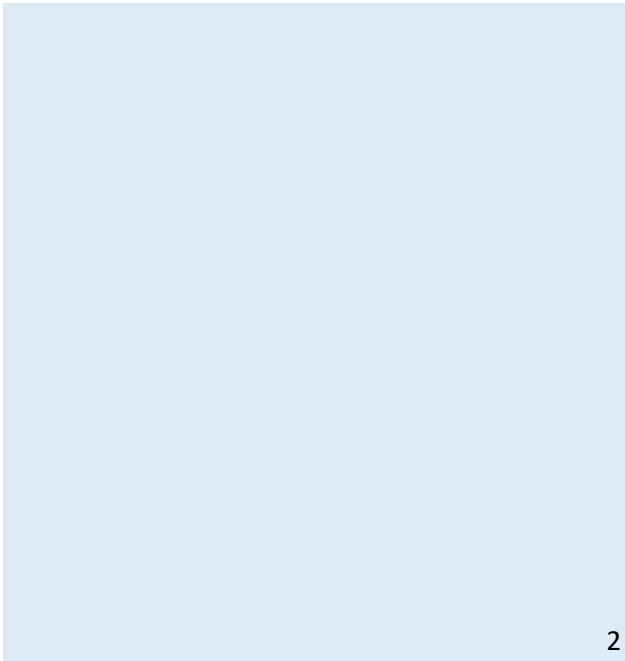

2

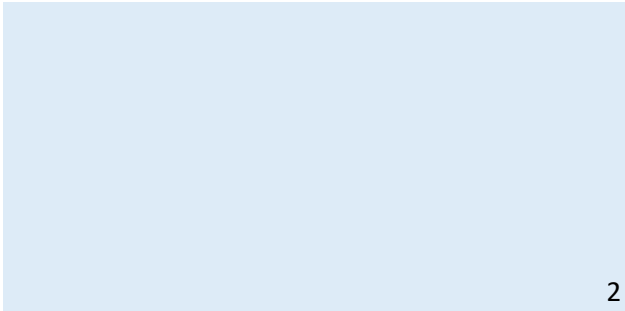

2

2

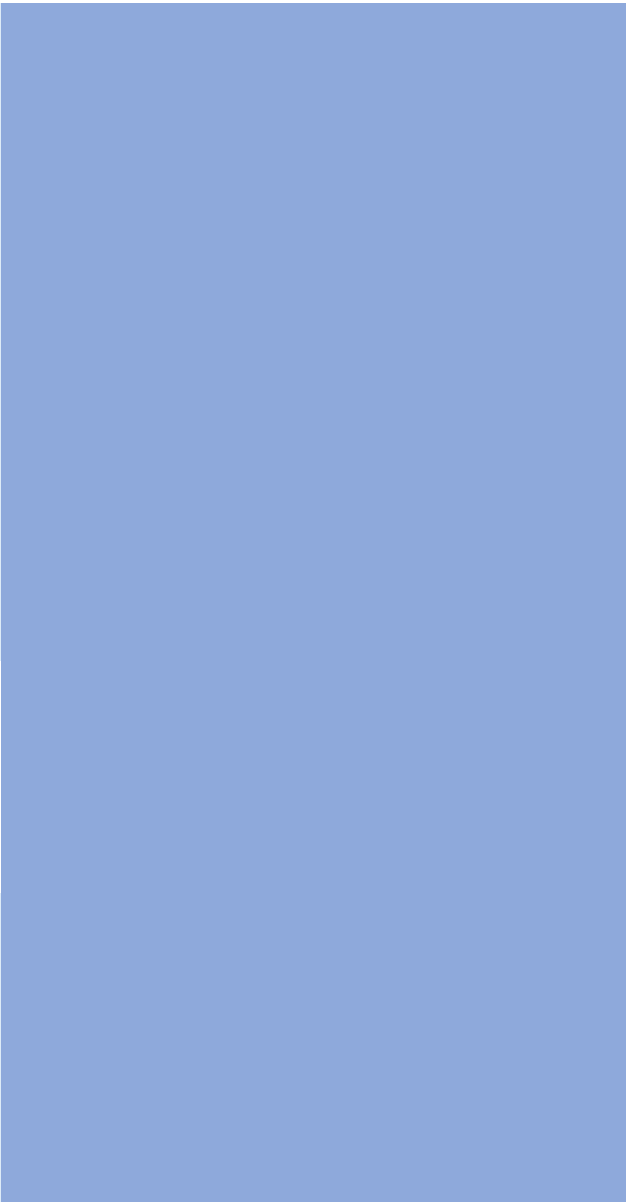

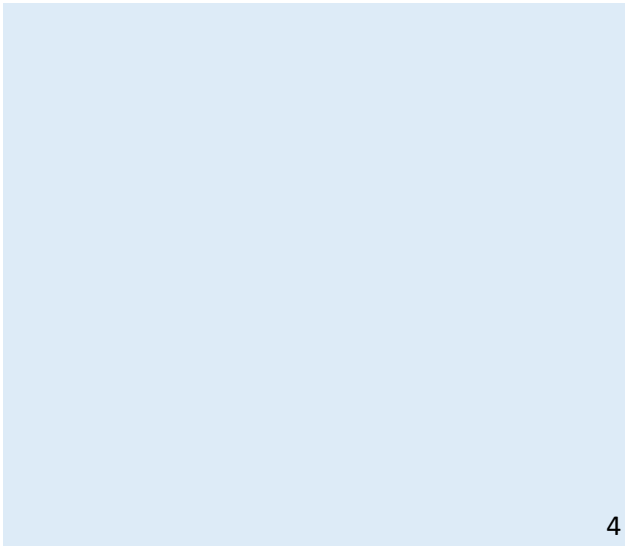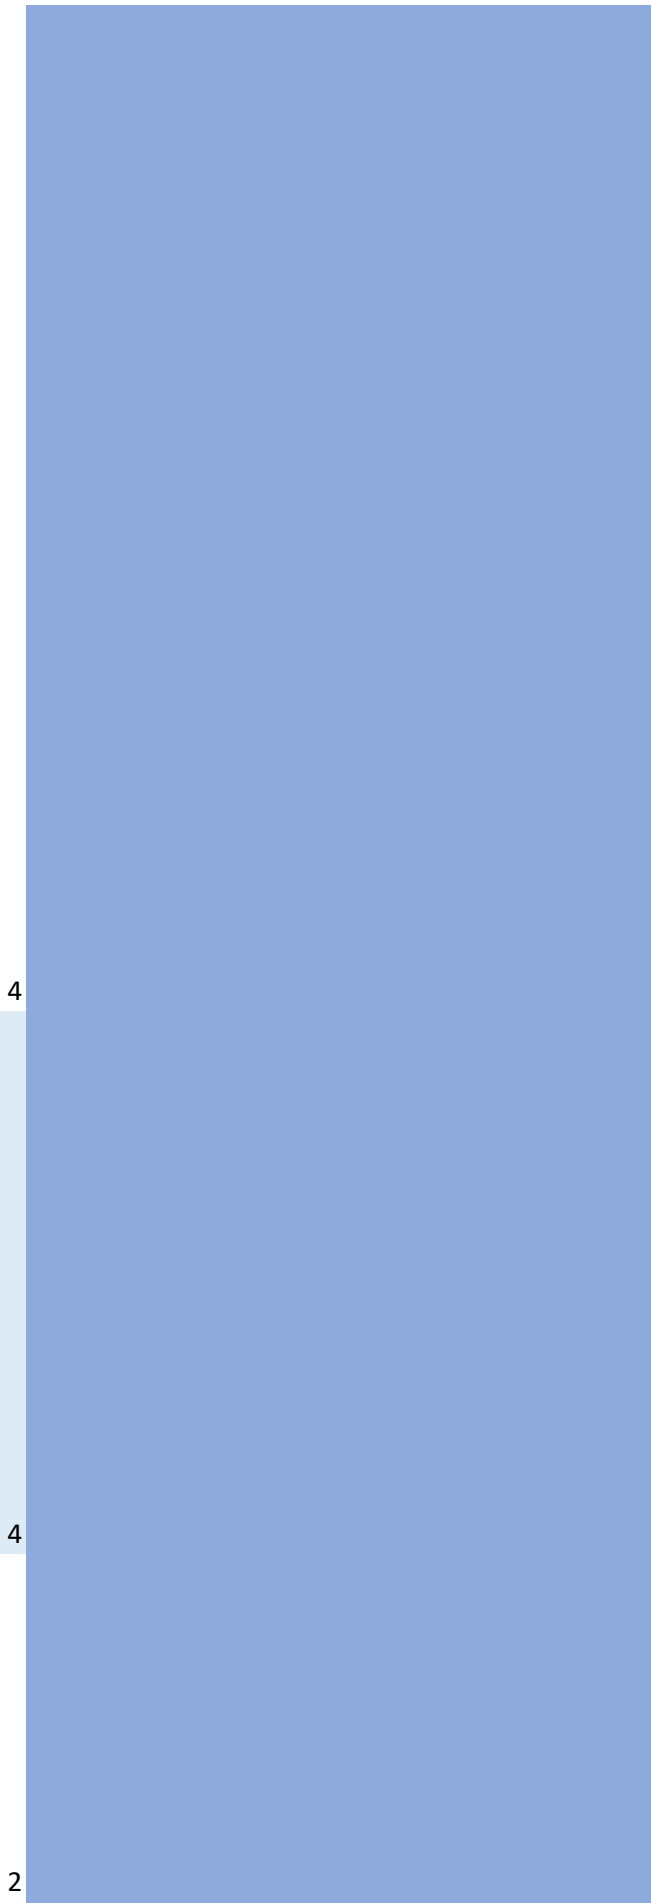



3

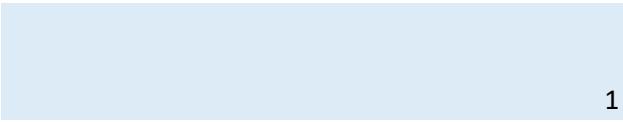

3

1

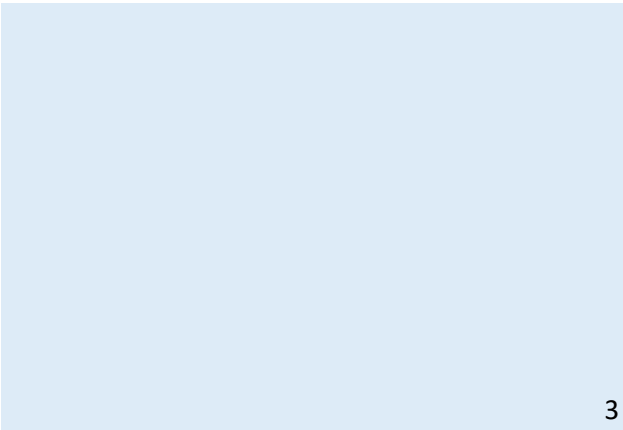

3

3

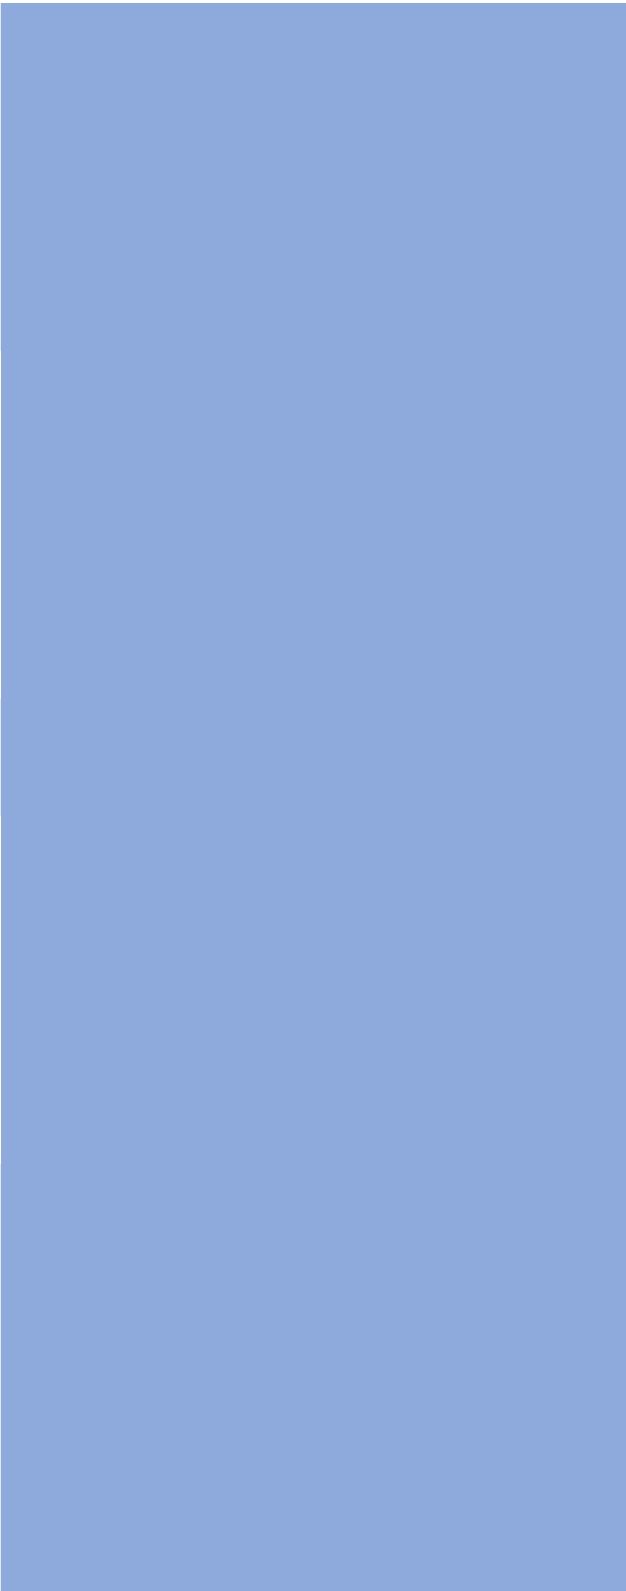

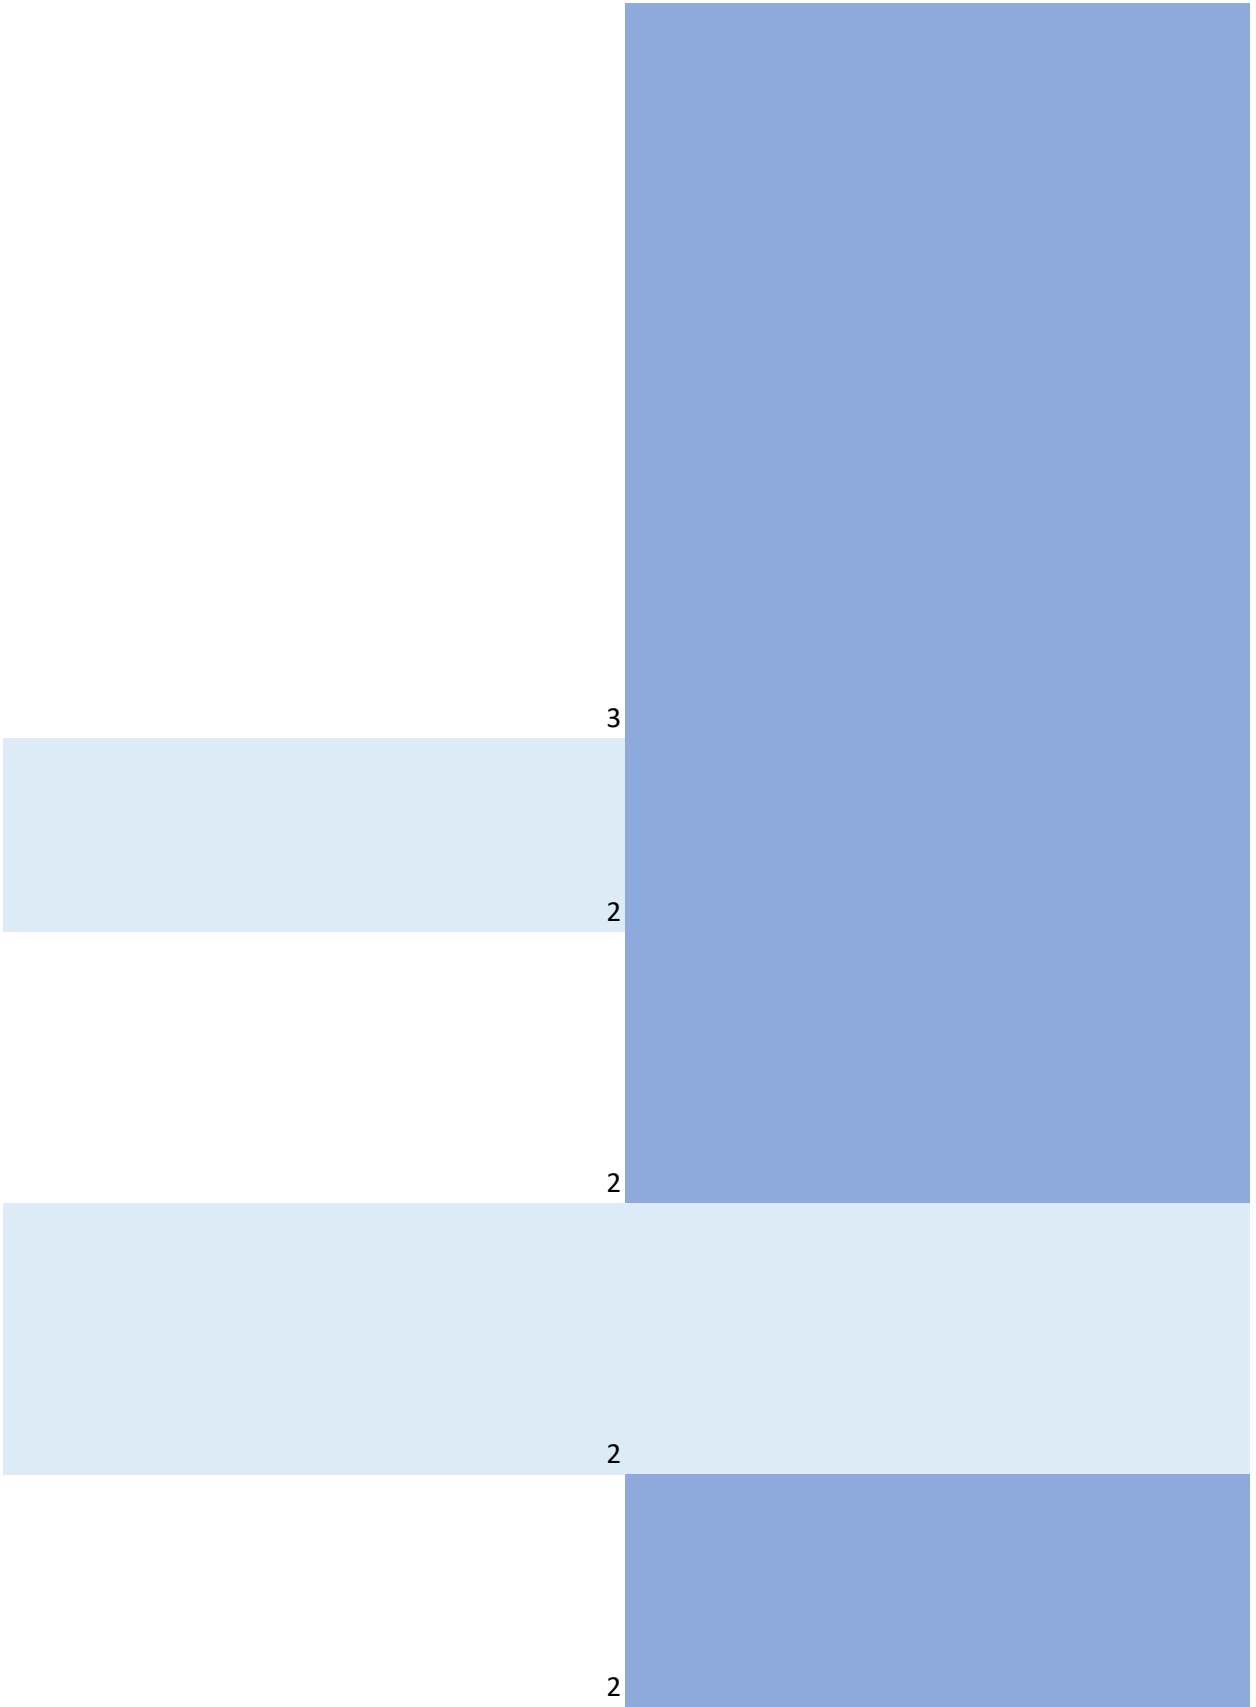

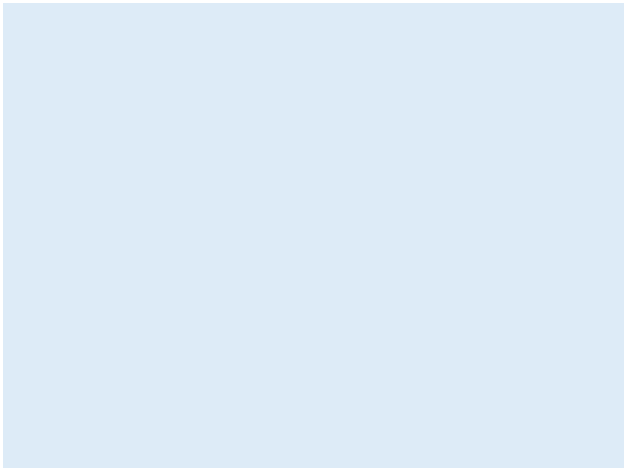

4

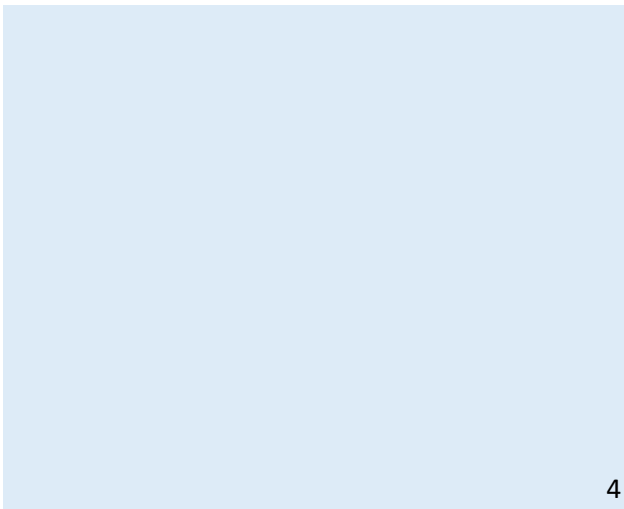

4

2

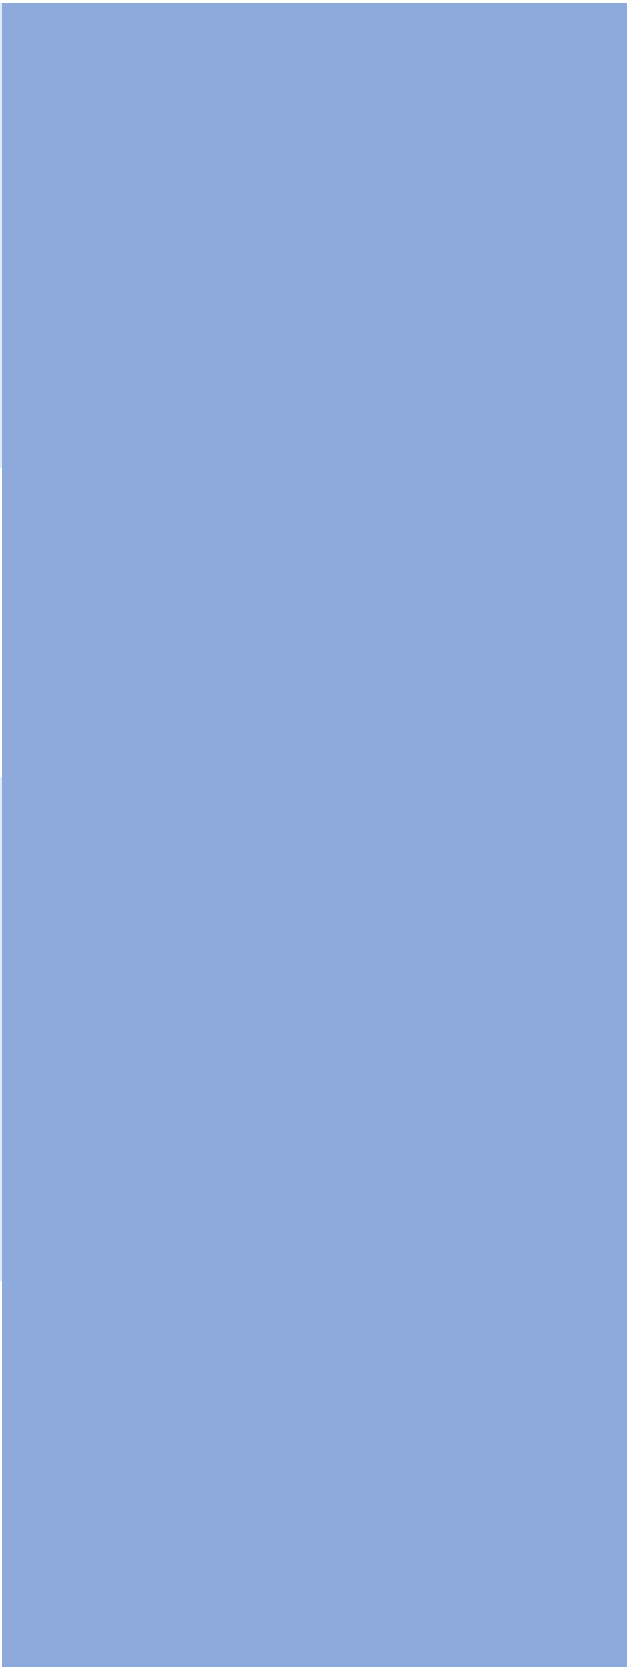

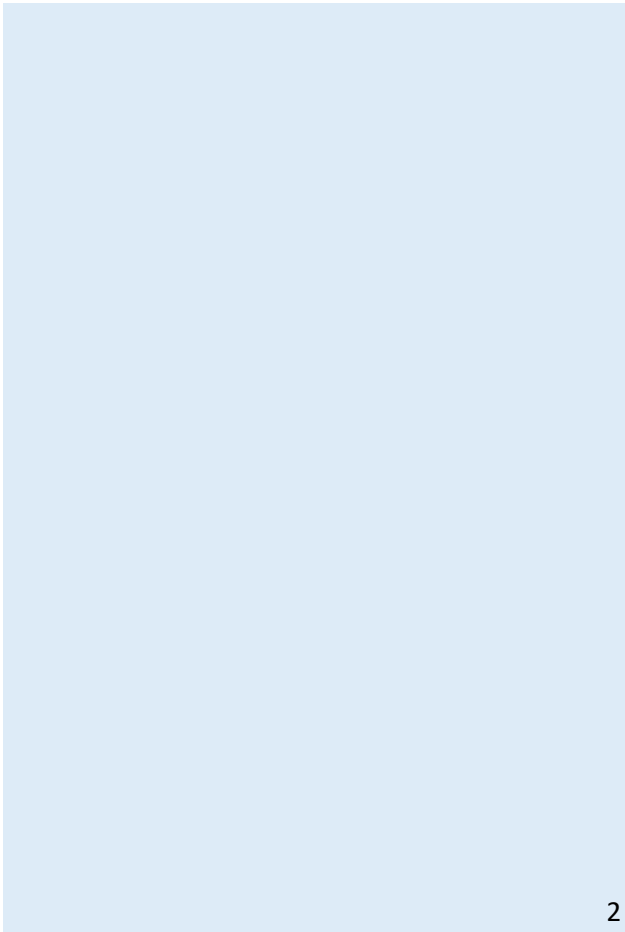

2

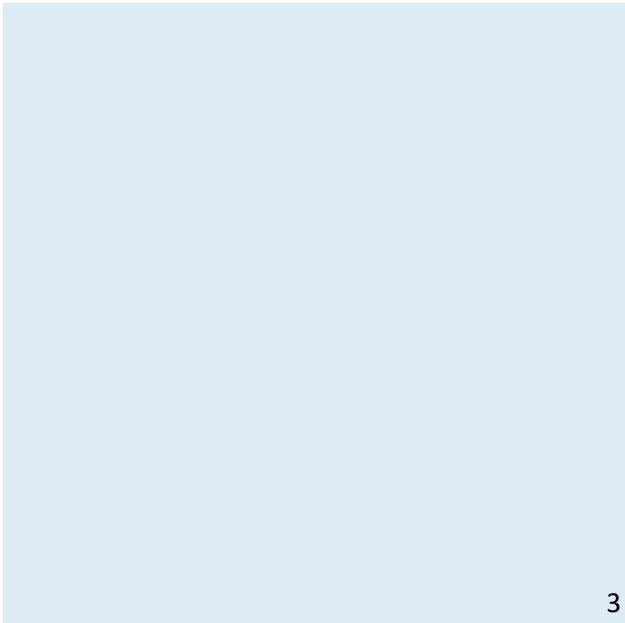

3

3

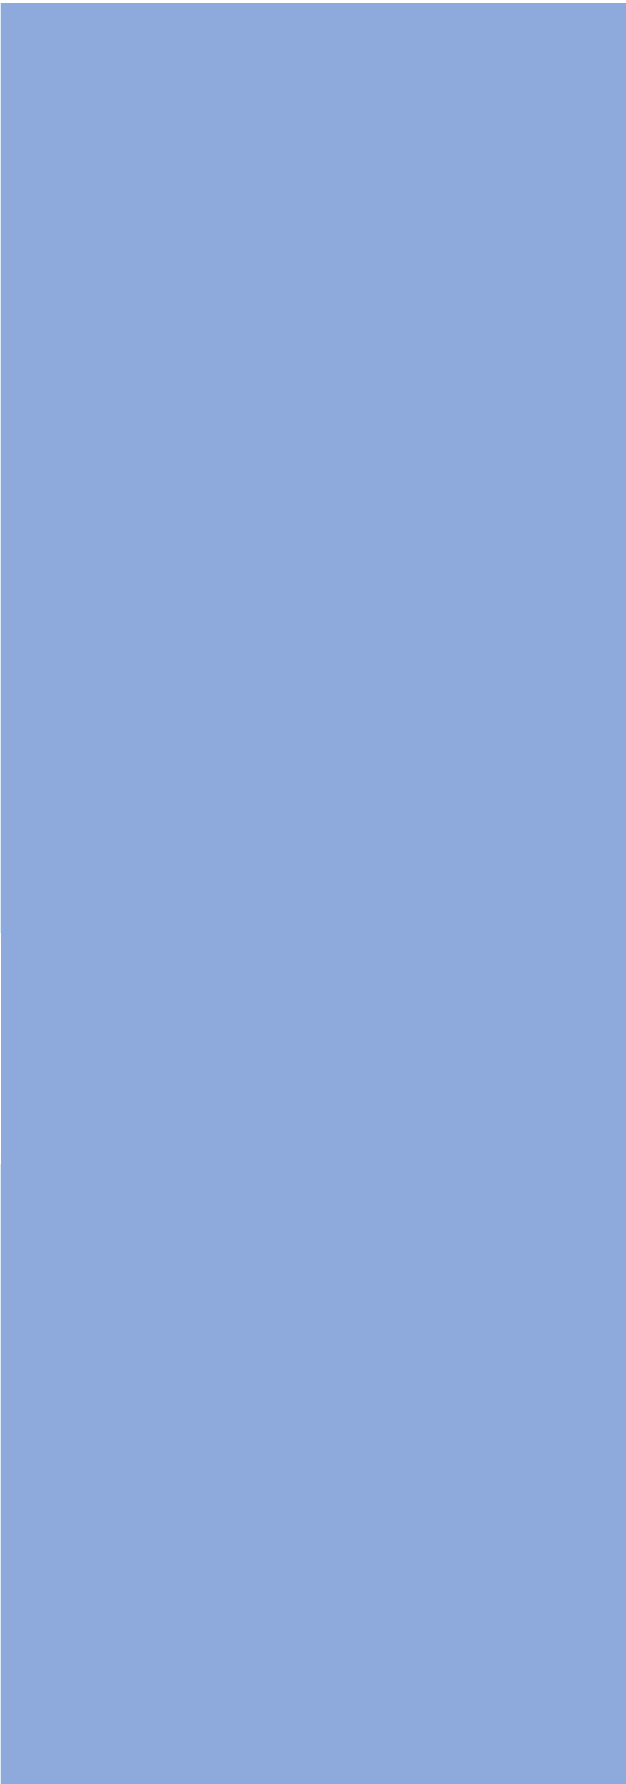

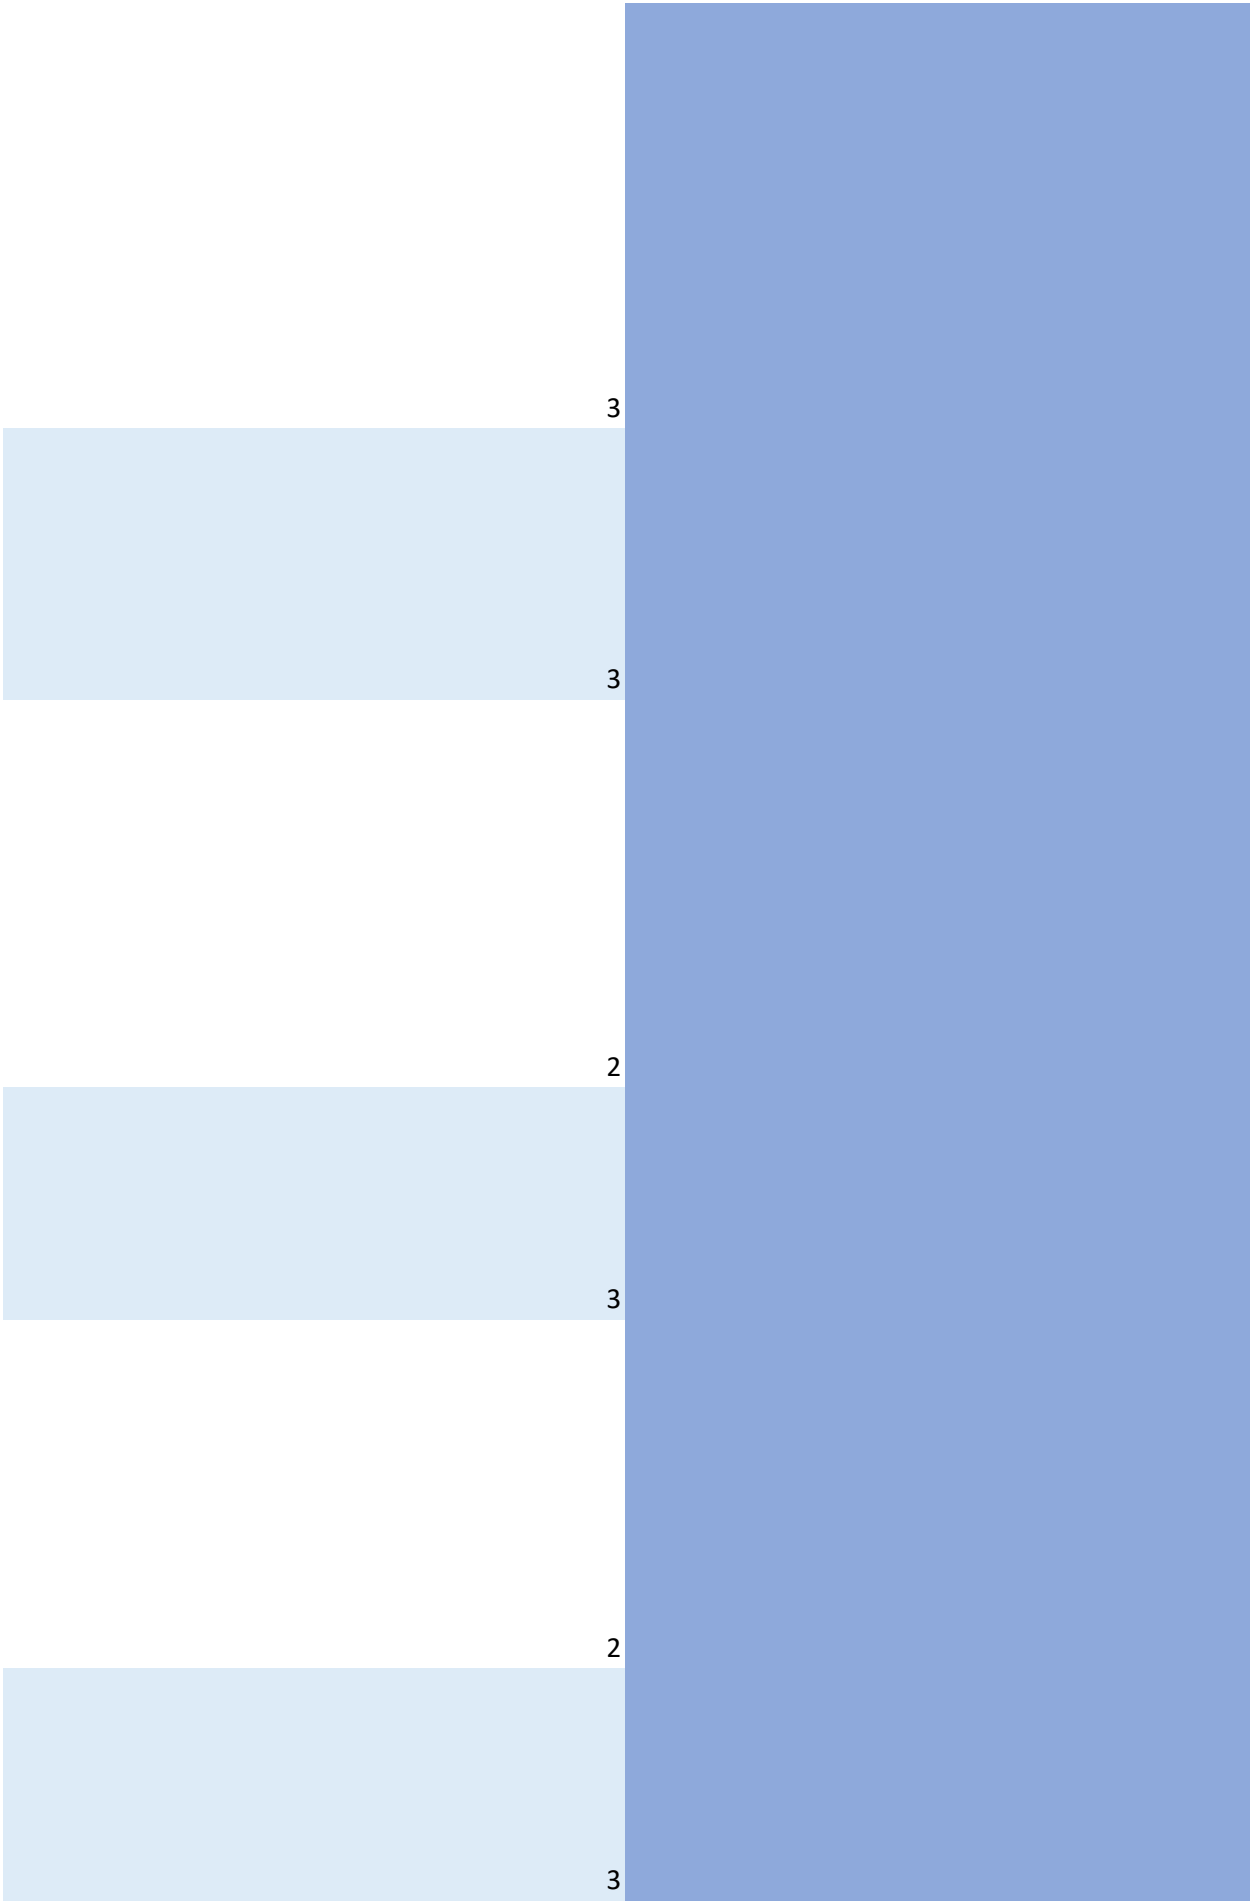

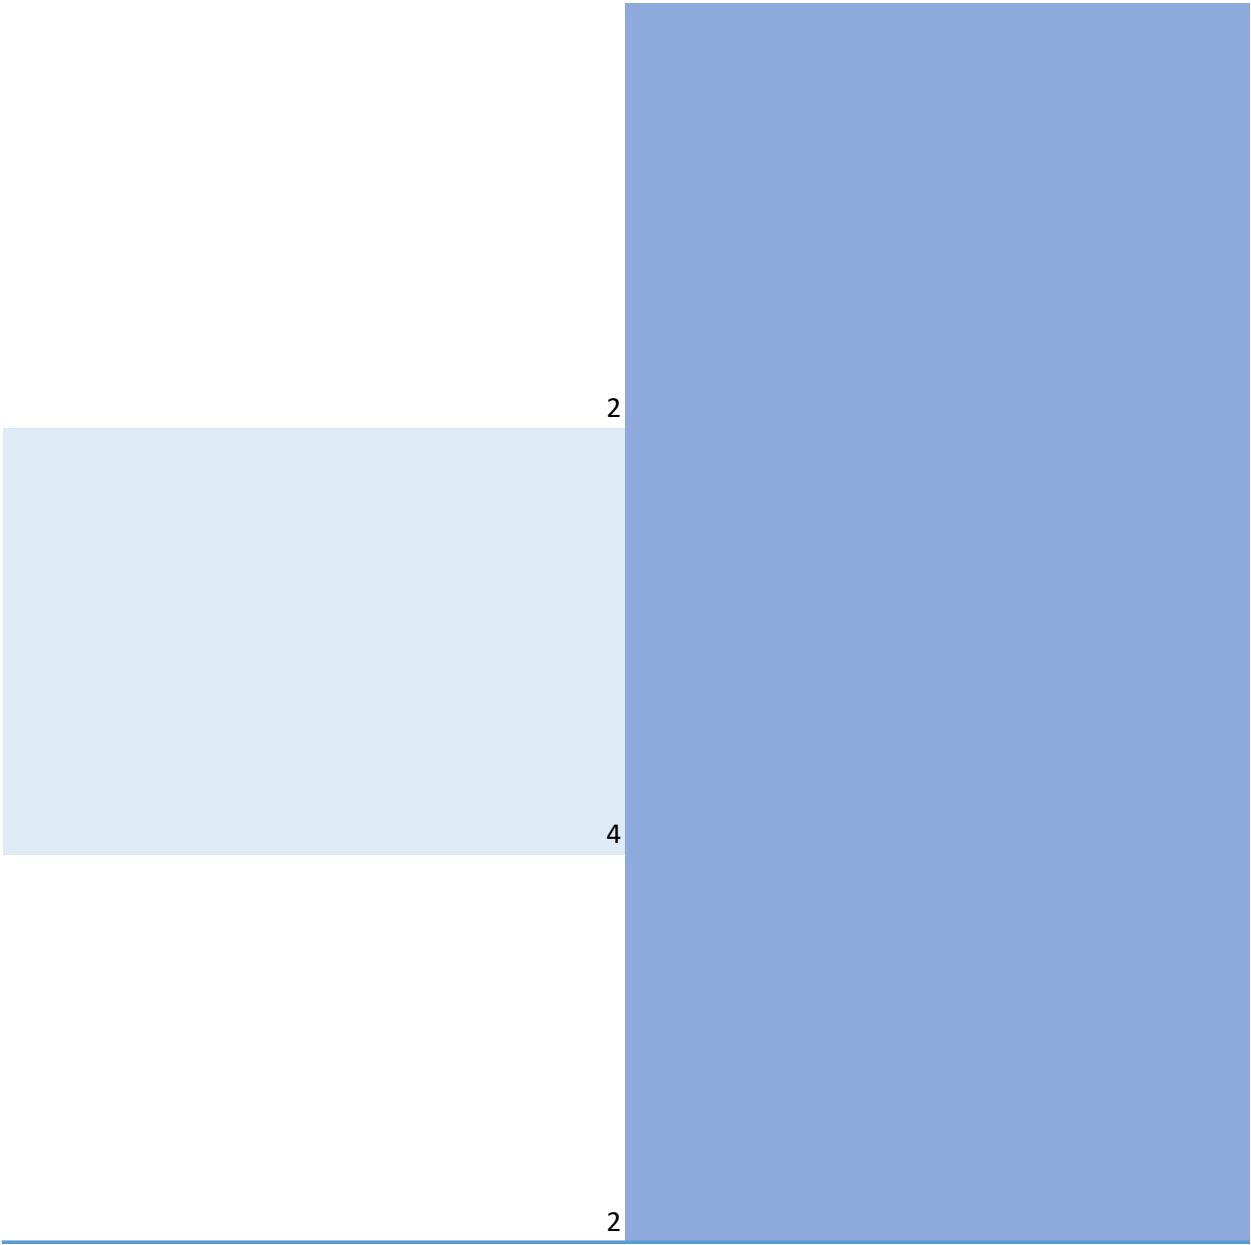

---

| In-hospital mangment (pharmacotherapy) | In-hospital managment (procedures - ECMO, intubation, tranplant etc.) |
|----------------------------------------|-----------------------------------------------------------------------|
| aspirin, fondaparinux, hydrocortisone  | mechanical ventilation                                                |

|    |    |
|----|----|
| NR | NR |
| NR | NR |

|                                                                                     |                         |
|-------------------------------------------------------------------------------------|-------------------------|
| lopinavir/ritonavir, hydroxychloroquine,                                            | CPAP                    |
| high-dose diuretics, broad-spectrum antibiotics, inotropic and vasopressive support | mechanical ventilation, |

immunoglobulins, steroids, anticoagulant  
(nafamostat metylate)

IABP, V-A ECMO, CRRT

bisoprolol, ramipril

NR

methylprednisolone 1g daily, intravenous diuretics NR

dobutamine, kanrenone 50mg, furosemide 20-40mg, bisoprolol 2,5mg, aspirin 500mg twice a day, hydroxychloroquine 200mg twice a daily, lopinavir/ritonavir 2 tablets of 200/50mg twice a day, methylprednisolone 1mg/kg for 3 days,

NR

methylprednisolone 200mg/day, immunoglobulin 20g/day, norepinephrine, diuretics (furosemide and torasemide), milrinone, piperacillin sulbactam, pantoprazol

NR

lopinavir/ritonavir, interferon alfa-1b, methylprednisolone, immunoglobulin, piperacillin-tazobactam,

ventilatory support - high-flow oxygen, CRRT, ECMO,

|                                                                                                                                                                                                                                                                                   |                                                                                                                                                                                                                  |
|-----------------------------------------------------------------------------------------------------------------------------------------------------------------------------------------------------------------------------------------------------------------------------------|------------------------------------------------------------------------------------------------------------------------------------------------------------------------------------------------------------------|
| IV methylprednisolone at 1.2mg/kg/d (40-mg Q8h), changed to high-dose IV methylprednisolone “pulse” therapy of 10mg/kg/d (1 g/d) for 3 days followed by tapering dose over 8 weeks. vasopresors: norepinephrine 20 mcg/min, dobutamine 10 µg/kg/min, and milrinone 0.5 mcg/kg/min | femoral-femoral VA-ECMO, CRRT, biventricular assist devices (BiVAD) with right ventricular assist device (RVAD) and Impella cardiac power (CP) microaxial left ventricular assist device (LVAD), pericardiostomy |
|-----------------------------------------------------------------------------------------------------------------------------------------------------------------------------------------------------------------------------------------------------------------------------------|------------------------------------------------------------------------------------------------------------------------------------------------------------------------------------------------------------------|

|                                                                                                                                                                                                                                           |                                  |
|-------------------------------------------------------------------------------------------------------------------------------------------------------------------------------------------------------------------------------------------|----------------------------------|
| vasopressors, inotropes, piperacillin/tazobactam, and vancomycin, norepinephrine 32 µg/min and epinephrin 5 µg/min, high-dose IV methylprednisolone “pulse” therapy of 15mg/kg/d (1g/d) for 3 days followed by tapering dose over 8 weeks | Impella CP microaxial LVAD, CRRT |
|-------------------------------------------------------------------------------------------------------------------------------------------------------------------------------------------------------------------------------------------|----------------------------------|

|                                                                                                                                                                                                                                                                                                                                           |                                     |
|-------------------------------------------------------------------------------------------------------------------------------------------------------------------------------------------------------------------------------------------------------------------------------------------------------------------------------------------|-------------------------------------|
| high-dose corticosteroid pulse therapy, anakinra (interleukin-1 receptor antagonist) IV 100mg tid for 7 days and IV immunoglobulin (IVIG) 2-g/kg single dose, empirically on piperacillin/tazobactam and vancomycin, inotropic agents (milrinone 0.375 mcg/kg/min and dobutamine 2.5 µg/kg/min), vasopressors (norepinephrine 20 mcg/min) | femoral-femoral VA-ECMO, Impella CP |
|-------------------------------------------------------------------------------------------------------------------------------------------------------------------------------------------------------------------------------------------------------------------------------------------------------------------------------------------|-------------------------------------|

|                                                                                                                                                                                                             |    |
|-------------------------------------------------------------------------------------------------------------------------------------------------------------------------------------------------------------|----|
| intravenous immunoglobulin (IVIG; 1 g/kg), broad-spectrum antibiotics (meropenem [500 mg] and doxycycline [200 mg/day]), high-dose corticosteroid (methylprednisolone 1 g/day), and remdesivir for COVID-19 | NR |
|-------------------------------------------------------------------------------------------------------------------------------------------------------------------------------------------------------------|----|

|                                                                                                                                                                             |    |
|-----------------------------------------------------------------------------------------------------------------------------------------------------------------------------|----|
| corticosteroids (methylprednisolone 1 mg/kg/day), broad-spectrum antibiotics (meropenem [500 mg q8 h for 5 days] and doxycycline [200 mg/day]), and remdesivir for COVID-19 | NR |
|-----------------------------------------------------------------------------------------------------------------------------------------------------------------------------|----|

meropenem [500 mg q8 h for 5 days] and  
doxycycline [200 mg/day]), methylprednisolone 1  
g/day, and remdesivir intubation, DC shock

meropenem [500 mg q8 h for 5 days] and  
doxycycline  
[200 mg/day]), methylprednisolone 1 g/day, and  
remdesivir NR

meropenem [500 mg q8 h for 5 days] and  
doxycycline [200 mg/day]), corticosteroid  
(methylprednisolone 1 mg/kg/day), and  
remdesivir. NR

broad-spectrum antibiotics (meropenem [500 mg  
q8 h for 5 days] and doxycycline [200 mg/day]),  
corticosteroid (methylprednisolone  
1 mg/kg/day), and remdesivir NR

IVIg (1 g/kg), broad-spectrum antibiotics  
(meropenem [500 mg q8 h for 5 days] and  
doxycycline [200 mg/day]), high-dose  
corticosteroid (methylprednisolone 1 g/day), and  
remdesivir cardio-version and lidocaine administration,  
resuscitation

heparin, dexamethasone

NR

continuous adrenalin/noradrenaline infusion,  
prophylactic antibiotic therapy  
(piperacillin/tazobactam)

2xresuscitation

amoxiclav, then i.v. piperacillin–tazobactam.

oxygen requirement via nasal cannula.

a 4-day regimen of intravenous immunoglobulin  
(IVIG) 20g daily and methylprednisolone (50 mg  
every 6 h)

initially placed on a non-rebreather mask with  
supplemental oxygen via nasal cannula and  
placed in the prone position, then quickly  
intubated and started on hydroxychloroquine  
therapy

methylprednisolone (1000 mg daily for 3 days) and  
gamma globulin (80 g daily for 2 days) in addition  
to catecholamine infusion and ECMO support

intubated and cannulated for extracorporeal  
membrane oxygenation (ECMO)

intravenous fluid bolus, antibiotics, and pressor support (norepinephrine), steroids

emergent right heart catheterization, placement of a percutaneous transvalvular left ventricular support device (Impella CP), veno-arterial extracorporeal membrane oxygenation (ECMO), hemodialysis

Hydrocortisone 50 mg, 6-hourly, and broad-spectrum antibiotics (piperacillin/tazobactam and vancomycin). Treatment with intravenous immunoglobulin (3 days), methylprednisolone (3 days), and tocilizumab.

Urgent pericardiocentesis, continuous renal replacement therapy. Coronary angiogram and endomyocardial biopsy performed via right common femoral artery (CFA). Pericardial tamponade requiring insertion of pericardial drain.

no information

an ICD was implanted on the 20th day of admission (due to the risk of sudden cardiac death), Synchronized cardioversion shock at 150 joules was applied with a resolution of the VT to 80 beats per minute of sinus rhythm on ECG re-evaluation

inotropic support with dobutamine (5 µg/kg/min)

Percutaneous subxiphoid pericardiocentesis (evacuation of 200 ml of citrine yellow effusion). Then - The patient was sedated, intubated and mechanical ventilation was instituted. Then - implantation of peripheral VA-ECMO as a bridge to recovery. Then - ventilator-associated pneumonia (Streptococcus pneumoniae and Haemophilus influenzae).

hydroxychloroquine and ceftriaxone (patient allergic to macrolides), adrenaline, levofloxacin (500 mg twice daily), antiviral therapy with remdesivir (100 mg once daily) and oseltamivir (150 mg once daily), anticoagulation therapy with low molecular weight heparin (LMWH) (6,000 IU twice daily), diuretic, pantoprazole (20 mg twice daily) and dexamethasone (10 mg once daily), aripiprazole (20 mg once daily), low doses of ramipril (2.5 mg) and bisoprolol (2.5 mg)

oxygen therapy at 10 L/min with non-rebreather mask, high-flow and then intubation, hemotransfusion,

loading dose of aspirin and fondaparinux, dobutamine, entacavir, antilymphocyte serum, high-dose corticosteroids (CS), and mycophenolate mofetil; maintenance used decreasing dose of CS, mycophenolate mofetil, and cyclosporine.

Emergency pericardiocentesis with removal of 300 mL of serosanguinous exudative fluid, clinical and biological status worsened rapidly progressive biventricular hypokinetic non-dilated cardiomyopathy, intubation, VA-ECMO, intra aortic balloon, heart transplantation

intravenous (IV) fluid boluses, vasopressors, and IV antibiotics, hydroxychloroquine and azithromycin, noradrenaline and vasopressin, tocilizumab, methylprednisolone, and IV immunoglobulin/ aspirin 800 mg three times a day and colchicine 0.5 mg twice a day intubation/ NR

colchicine (500 µg twice daily) and ibuprofen (400 mg three times daily), 1200 mg per day of ibuprofen, 30 mg per day of prednisolone, codeine phosphate, 0.9% sodium chloride NR

noradrenalin, dobutamine intubation, VA-ECMO

methylprednisolone (200 mg/day), and intravenous human immunoglobulin (IVIG; 20 g/day) for 4 days, hydroxychloroquine (800 mg on day 1, then 400 mg/day) and azithromycin (500 mg/day), both during 5 days without a QTc greater than 450 ms, and lopinavir/ritonavir (800/200 mg/day, 10 days), norepinephrine, dobutamine, levosimendan, furosemide oxygen therapy without mechanical ventilation

intravenous ceftriaxone (1 g once daily),  
intravenous azithromycin (500 mg once daily), and  
a loading dose of oral hydroxychloroquine (400 mg  
twice daily). In addition to antimicrobial therapy,  
the patient also received intravenous furosemide  
(60 mg once) for clinical hypervolemia, heart  
failure treatment

5L/min of oxygen via nasal cannula, then 15L/  
min, BiPAP

methylprednisolone 100 mg then  
methylprednisolone 100 mg and tocilizumab 800  
mg and tocilizumab 800 mg, high-dose vasopressor  
support

VA-ECMO, continuous venovenous  
haemofiltration, biventricular support with a  
ProtekDuo and axillary Impella 5.0

Serum therapy and intravenous (IV) antibiotic  
treatment with meropenem 1 g/8 h plus  
metronidazole 500 mg/8 h, hydroxychloroquine,  
azithromycin and 600 mg of IV tocilizumab,  
dobutamine, nitroprusside

intubation

norepinephrine, insulin drip for the management of DKA and broad-spectrum antibiotics coverage with IV vancomycin and piperacillin-tazobactam, potassium, dobutamine, norepinephrine, heparine, methylprednisolone 1 gram daily for three days      intubation, Impella

A: ibuprofen 400mg 3x/d for three weeks  
 acetylsalicyl acid 100mg/ d  
 pantoprazole 40mg/d B:sacubitril/  
 valsartan 24/26mg 2x/d  
 bisoprolol 5mg/d  
 ivabradine 5mg 2x/d  
 eplerenone 25mg/ d  
 torasemid 20mg 2x/d  
 acetylsalicyl acid 100mg/ d  
 clopidogrel 75mg/ d  
 atorvastatin 40mg/d  
 pantoprazole 40mg/ d

NR

1. intravenous fluid resuscitation and a low rate of noradrenaline (0.01 µg/kg/min)
2. levosimendan infusion
3. high-dose intravenous immunoglobulin (IVIG), dexamethasone and IL-1-blockade (anakinra)

percutaneous ventricular assist device - Impella  
 invasive mechanical ventilation  
 V-A ECMO

|                                                                                         |    |
|-----------------------------------------------------------------------------------------|----|
| Hydroxychloroquine, azithromycin, ceftriaxone, tigecycline, favipiravir, and colchicine | no |
|-----------------------------------------------------------------------------------------|----|

|                                                            |    |
|------------------------------------------------------------|----|
| colchicine 0.5 mg twice daily, prednisone 40 mg once daily | no |
|------------------------------------------------------------|----|

|                                                                                                                                                                                                                                                                                                                                                                         |                                                                                                                                            |
|-------------------------------------------------------------------------------------------------------------------------------------------------------------------------------------------------------------------------------------------------------------------------------------------------------------------------------------------------------------------------|--------------------------------------------------------------------------------------------------------------------------------------------|
| 5 mg of ramipril and 5 mg of bisoprolol<br>hydroxychloroquine,<br>azithromycin, and ceftriaxone<br>methylprednisolone, 500 mg intravenously daily<br>for 4 days, with subsequent prednisone taper;<br>colchicine, 0.6 mg every 12 h<br>milrinone, norepinephrine,<br>interleukin-6 inhibitor tocilizumab,<br>aldose reductase inhibitor (ARI) currently known as AT-001 | no<br><br><br><br><br><br>endotracheal intubation and mechanical ventilation<br>neuromuscular blockade with continuous rocuronium infusion |
|-------------------------------------------------------------------------------------------------------------------------------------------------------------------------------------------------------------------------------------------------------------------------------------------------------------------------------------------------------------------------|--------------------------------------------------------------------------------------------------------------------------------------------|

|                                                                                                                                                                                                                                                               |                                                                                                                                                         |
|---------------------------------------------------------------------------------------------------------------------------------------------------------------------------------------------------------------------------------------------------------------|---------------------------------------------------------------------------------------------------------------------------------------------------------|
| fluid overloading and norepinephrine<br>immunoglobulins (80 mg/d) for 4 days and<br>methylprednisolone (500 mg/d) at tapering doses<br>for 14 days and antiviral treatment consisting of<br>IFN B (0.25 mg/48 h) and ritonavir/lopinavir (400 mg/100 mg/12 h) | balloon counterpulsation and venoarterial<br>extracorporeal membrane oxygenation (ECMO)<br>via the femoral artery, resuscitation,<br>pericardiocentesis |
|---------------------------------------------------------------------------------------------------------------------------------------------------------------------------------------------------------------------------------------------------------------|---------------------------------------------------------------------------------------------------------------------------------------------------------|

ramipril, bisoprolol and prednisone  
(1 mg/Kg daily) in addition to anti-viral therapy  
with remdesivir

no

bisoprolol and lisinopril

no

500-mg dose of azithromycin and a single 75-mg  
dose of oseltamivir.

NR

Hydroxychloroquine, Intravenous Dexamethasone,  
Intravenous  
Immunoglobulin, intravenous Ascorbic acid nd oral  
Melatonin, broad-spectrum antibiotics,  
vasopressor and amiodaron, , Midodrine

NR

intravenous diuretics, rate-control agents,  
anticoagulation, ACE inhibitor and  
mineralocorticoid antagonist

NR

aspirin 300 mg, clopidogrel 300 mg and  
simvastatin 20mg, proton pump inhibitor PPI 40mg,  
plavix kardegic, converting enzyme inhibitor,  
bisoprolol, and sars cov 2 infection treatment:  
vitamin c, zinc, azythromicin, dexamethasone and  
curative anticoagulation Enoxaparin high concentration mask 8l/min

cefotaxime and clindamycin, acetylsalicylic acid  
300 mg, furosemide and norepinephrine (2 L/min) by nasal cannula

Aspirin (3,000 mg/day) and colchicine (1 mg/day),  
prednisolone NR

subcutaneous anakinra (100 mg  
daily), an interleukin-1 receptor antagonist NR

moxicillin with clavulanic acid, clarithromycin, and antipyretics

bone marrow and lymph node biopsy

aspirin (81 mg once daily), Clopidogrel (75 mg once daily) and colchicine (0.6 mg twice daily), Enalapril (2.5 mg once daily) and carvedilol (3.125 mg twice daily)

NR

500 mg oral azithromycin, 1 g ceftriaxone i.v./daily. 125 mg i.v methylprednisolone/ 1x, 40 mg prednisone p.o / daily, aspirin 325 mg, ticagrelor 180 mg, and a heparin infusion (initial bolus 60 U/kg, followed by 12 U/kg/h). dobutamine, norepinephrine, furosemide, vancomycin and piperacillin/tazobactam

Central venous catheter was placed and showed low cardiac output with a significantly reduced mixed venous O2 saturation of 28%

|                                                                                         |                                                                                                                   |
|-----------------------------------------------------------------------------------------|-------------------------------------------------------------------------------------------------------------------|
| norepinephrine , heparin, tocilizumab,<br>hydroxychloroquine, oseltamivir, azithromycin | veno-arterial extra- corporeal membrane<br>oxygenation (VA-ECMO), continuous venous-<br>venous haemodiafiltration |
|-----------------------------------------------------------------------------------------|-------------------------------------------------------------------------------------------------------------------|

|                                                                      |                    |
|----------------------------------------------------------------------|--------------------|
| Vasopressors, Inotropes, Azithromycin,<br>Vancomycin, Cefepime, IVIG | Pericardiocentesis |
|----------------------------------------------------------------------|--------------------|

|                                                                                                                                   |    |
|-----------------------------------------------------------------------------------------------------------------------------------|----|
| angiotensin-converting enzyme inhibitors and<br>beta-blockers, anticoagulant and anti-arrhythmic<br>therapy, antibiotic treatment | NR |
|-----------------------------------------------------------------------------------------------------------------------------------|----|

|                                        |    |
|----------------------------------------|----|
| cyclophosphamide and high-dose steroid | no |
|----------------------------------------|----|

|                                                                                                                                                                                              |      |
|----------------------------------------------------------------------------------------------------------------------------------------------------------------------------------------------|------|
| Hydroxychloroquine and azithromycin,<br>broad-spectrum antibiotics and hydrocortisone                                                                                                        | ECMO |
| cetaminophen intravenous (IV) drip,<br>ceftriaxone, and vancomycin, hydroxychloroquine<br>and<br>azithromycin, dobutamine, indomethacin,<br>Intravenous methylprednisolone and<br>colchicine | no   |

acetaminophen

no

hydroxychloroquine, azithromycin, bisoprolol,  
tocilizumab, methylprednisolone

NR

adrenaline, noradrenaline

non-invasive ventilation, IABP, VA-ECMO, ortotra

---

| Complications (cardiogenic shock, ARDS, heart failure, multi-organ failure etc., with day of occurrence) | Outcome (death/recovered/undetermined) with time |
|----------------------------------------------------------------------------------------------------------|--------------------------------------------------|
| ARDS                                                                                                     | NR                                               |

|    |    |
|----|----|
| NR | NR |
| NR | NR |

|                                                |                                 |
|------------------------------------------------|---------------------------------|
| NR                                             | recovered, discharged on day 13 |
| ARDS, mixed distributive and cardiogenic shock | recovered, discharged on day 12 |

|                   |                                                                                                    |
|-------------------|----------------------------------------------------------------------------------------------------|
| Cardiogenic shock | recovered, transferred to the previous for rehabilitation hospital on the 24th day after admission |
|-------------------|----------------------------------------------------------------------------------------------------|

NR

NR

|               |                                           |
|---------------|-------------------------------------------|
| heart failure | recovered, duration of hospitalization NR |
|---------------|-------------------------------------------|

heart failure

At the time of submission, the patient still hospitalized with progressive clinical and hemodynamic improvement.

Reported that the myocardial injury markers fully recovered to the normal range after 3 weeks of treatment.

cardiogenic shock and pulmonary infection

septic shock and DIC

death on the 33rd day of hospitalization

|                                                         |                                                                                                                                               |
|---------------------------------------------------------|-----------------------------------------------------------------------------------------------------------------------------------------------|
| cardiogenic tamponade with concurrent cardiogenic shock | discharged home 28 days after admission                                                                                                       |
|                                                         | discharged home 23 days after admission on intermittent hemodialysis, which was stopped 3 weeks later after improvement of the renal function |
| cardiogenic and vasodilatory shock                      |                                                                                                                                               |

|                                    |                                                                                                                             |
|------------------------------------|-----------------------------------------------------------------------------------------------------------------------------|
| cardiogenic and vasodilatory shock | recovery. After 14 days of hospitalization, the patient was discharged home. At this time, both MSC devices were explanted. |
|------------------------------------|-----------------------------------------------------------------------------------------------------------------------------|

|    |                                                                        |
|----|------------------------------------------------------------------------|
| NR | death. she died due to cardiac arrest (less than 24 h after admission) |
|----|------------------------------------------------------------------------|

|    |                                                                                                                                                            |
|----|------------------------------------------------------------------------------------------------------------------------------------------------------------|
| NR | recovery. discharged after 2 weeks with an ejection fraction of 45%, Follow-up of the patient for 3 months revealed an LVEF of 45% and normal RV function. |
|----|------------------------------------------------------------------------------------------------------------------------------------------------------------|

NR

recovery. Follow-up of the patient for 3 months showed an LVEF of 45%–50%

NR

recovery. discharged after 7 days with stable hemodynamics. Follow-up of the patient for 3 months showed an LVEF of 45% and a normal cTnl value.

NR

recovery. discharged in a satisfying condition. Follow-up of the patient for 3 months showed an LVEF of 45%, mild pericardial effusion, and normal right ventricular size and function.

NR

recovered within 3 days and was discharged in a satisfying condition. Follow-up of the patient for 3 months revealed LVEF of 45%–50% and a normal cardiac function

NR

recovery, discharged in a satisfying condition after 10 days. Follow-up of the patient over 3 months demonstrated an LVEF of 50%

|    |                                                |
|----|------------------------------------------------|
| NR | recovery. discharged in a satisfying condition |
|----|------------------------------------------------|

|  |                                                                         |
|--|-------------------------------------------------------------------------|
|  | the patient died of cardio-respiratory failure within 48 h of admission |
|--|-------------------------------------------------------------------------|

|    |                    |
|----|--------------------|
| NR | recovery (10 DOHS) |
|----|--------------------|

|   |                                                                                                  |
|---|--------------------------------------------------------------------------------------------------|
| - | RECOVERY - The patient was ultimately discharged for physical rehabilitation on hospital day 52. |
|---|--------------------------------------------------------------------------------------------------|

|                   |                                                     |
|-------------------|-----------------------------------------------------|
| Cardiogenic shock | death on day 5 due to intractable cardiogenic shock |
|-------------------|-----------------------------------------------------|

|                                                                 |                                                                                    |
|-----------------------------------------------------------------|------------------------------------------------------------------------------------|
| combined right and left ventricular failure, multiorgan failure | significant improvement in hemodynamics and ejection fraction over the next 5 days |
|-----------------------------------------------------------------|------------------------------------------------------------------------------------|

Pulseless electrical activity cardiac arrest with extra-corporeal membrane oxygenation (ECMO) and cardiopulmonary resuscitation (CPR). Distal perfusion cannulae placed. Development of ischaemic right lower leg (without ECMO cannulae) requiring DSA and fasciotomy.

death, after 9 days of hospitalization

|      |                                                                                                                                                 |
|------|-------------------------------------------------------------------------------------------------------------------------------------------------|
| none | Recovery. The patient remained asymptomatic for the rest of the hospitalization period and was discharged home after 22 days of hospitalization |
|------|-------------------------------------------------------------------------------------------------------------------------------------------------|

Cardiogenic shock in less than 12 h with signs of systemic hypoperfusion (systemic arterial pressure <60 mm Hg, sweating, vomiting, oliguria, and lactate 4.5 mmol/L) and further degradation of the left ventricular systolic function (LVEF 10%, left ventricular outflow tract time-velocity integral 6 cm) despite an escalation of the inotropic (dobutamine 10 µg/kg/min) and vasopressor (noradrenaline 0.17 µg/kg/min) support.

Recovery. At 3-month follow-up, echocardiography confirmed the complete myocardial recovery (LVEF 65%) and cardiac magnetic resonance imaging showed no signs of myocardial residual fibrosis.

clinical deterioration due to cardiogenic shock with severe hypotension, tachycardia, oliguria, anemia, and marked desaturation

Recovery. After 3 weeks, the patient was discharged, hemodynamically stable and asymptomatic.

patient became hypotensive and hypoxaemic (nasal cannula, oxygen 4 L/min) with clinical signs of pulmonary oedema, rapidly progressive biventricular hypokinetic non-dilated cardiomyopathy, myocarditis fulminant with cardiogenic shock

The patient fully recovered and was discharged from the hospital for cardiovascular rehabilitation without any persistent respiratory or cardiac symptom.

acute kidney injury, ARDS/ NR

discharged on day 16  
/chest pain-free upon  
discharge

lower limb myositis

discharged day 13

AKI KDIGO 3, need for vasoactive support, cardiogenic  
shock

deceased 6 days after  
admission

cardiogenic shock

discharged day 16

respiratory distress

discharged

recovered from critical illness and is currently on the general medical floor awaiting

respiratory distress, hypotensive, rapid atrial fibrillation, respiratory failure, oliguric kidney failure

discharge to a rehabilitation centre

cardiogenic shock

One month after discharge, he was completely recovered

ARDS, ventricular tachycardia, cardiogenic shock due to myocarditis fulminant, acute oliguric renal failure

The Impella device was then removed, dobutamine was weaned off, and the patient was extubated the next day.

NR

Discharged

septic shock, severe end-organ failure

recovery

no

recovery

no

recovery

no

recovery

cardiogenic shock, severe ARDS,

recovery

cardiac arrest - electrical activity with no pulse and requiring cardiopulmonary resuscitation, emergent pericardiocentesis (drainage of serous fluid), and high-dose vasopressors for hemodynamic recovery

recovery

|    |          |
|----|----------|
| no | recovery |
| no | NR       |

|                                                                   |       |
|-------------------------------------------------------------------|-------|
| NR                                                                | NR    |
| a combination of cardiogenic and septic shoc, respiratory<br>arre | death |

|    |          |
|----|----------|
| NR | recovery |
|----|----------|

NR

discharged on day 7

respiratory distress with oliguria and hypotension, facial nerve palsy after discharge

discharged 11 days after admission

Ten days after admission, the patient also had bilateral peripheral facial nerve palsy; he could not close his mouth completely and had a drooping corner of the mouth that was more severe on the left side than on the right. He was also unable to wrinkle his forehead, and brain magnetic resonance imaging showed no abnormal findings

discharged 24 days after admission

NR

recovered

Kikuchi-Fujimoto disease

dsicharged, at 7  
months physical  
impairment persists,  
and on  
echocardiography  
reduced ejection  
fraction (53%) with  
impaired global systolic  
heart function is still  
present

no

discharged

with acute on chronic respiratory failure

death

|                                                   |                                                                                                                                                                                                               |
|---------------------------------------------------|---------------------------------------------------------------------------------------------------------------------------------------------------------------------------------------------------------------|
| cardiogenic shock secondary to severe myocarditis | recovery. The patient's condition improved gradually, off oxy- gen, and a repeat transthoracic echocardiogram at 60 days showed improved cardiac function with a left ven- tricular ejection fraction of 50%. |
|---------------------------------------------------|---------------------------------------------------------------------------------------------------------------------------------------------------------------------------------------------------------------|

|                                                     |                 |
|-----------------------------------------------------|-----------------|
| gastro-intestinal bleeding and multi-organ failure. | death ( 4 DOHS) |
|-----------------------------------------------------|-----------------|

|    |                 |
|----|-----------------|
| NR | recovery, day 9 |
|----|-----------------|

|                                         |          |
|-----------------------------------------|----------|
| acute renal injury with microhaematuria | recovery |
|-----------------------------------------|----------|

|                         |               |
|-------------------------|---------------|
| cardiogenic shock, ARDS | death (7DOHS) |
|-------------------------|---------------|

|      |    |
|------|----|
| ARDS | NR |
|------|----|

no

NR

no

recovery

cardiogenic shock, sepsis

death
